# Supplementary material for: A copper-catalyzed direct C(sp2)–H alkylsulfonylation of alkenes using alkylsilyl peroxides and DABCO·(SO2)2
Source: Royal Society of Chemistry journal article supplement (doi:10.1039/d3qo01119d), 2023-01-01

## Supporting Information

### A copper-catalyzed direct C(sp<sup>2</sup>)-H alkylsulfonylation of alkenes, alkylsilyl peroxides and DABCO·(SO<sub>2</sub>)<sub>2</sub>

Xueni Tian,<sup>a</sup> Lingling Chen,<sup>a</sup> Tonghao Zhu<sup>\*,a</sup> and Jie Wu<sup>\*,a,b,c</sup>

<sup>a</sup> School of Pharmaceutical and Chemical Engineering & Institute for Advanced Studies, Taizhou University, Taizhou 318000, China

<sup>b</sup> State Key Laboratory of Organometallic Chemistry, Shanghai Institute of Organic Chemistry, Chinese Academy of Sciences, Shanghai 200032, China

<sup>c</sup> School of Chemistry and Chemical Engineering, Henan Normal University, Xinxiang 453007, China

\*E-mail: zhuth@tzc.edu.cn and jie\_wu@fudan.edu.cn

#### Table of Contents

|                                                                                   |         |
|-----------------------------------------------------------------------------------|---------|
| 1. General Information                                                            | S2      |
| 2. General procedures for the synthesis of ( <i>E</i> )-vinyl sulfone derivatives | S3      |
| 3. Gram-scale and gram-scale synthesis of <b>3aa</b>                              | S4      |
| 4. Optimization of reaction conditions                                            | S5-S6   |
| 5. References                                                                     | S7      |
| 6. Characterization data for products                                             | S8-S28  |
| 7. <sup>1</sup> H, <sup>19</sup> F and <sup>13</sup> C NMR spectra of products    | S29-S86 |

### **General Information**

All reactions were carried out in oven dried Schlenk tubes under nitrogen atmosphere. Alkylsilyl peroxides **2** were prepared as reported.<sup>1</sup> Copper iodide (CuI) was purchased from Adamas-beta, DABCO·(SO<sub>2</sub>)<sub>2</sub> and 1,10-phenanthroline were purchased from Bidepharm.com. <sup>1</sup>H, <sup>13</sup>C, <sup>19</sup>F NMR spectra were recorded in CDCl<sub>3</sub> on Bruker Avance 400 MHz spectrometers. High resolution mass spectra (HRMS) were obtained using a commercial apparatus (ESI Source). Electrospray-ionisation HRMS data were acquired on a Q-ToF mass spectrometer (Waters SYNAPT G2-Si) LC-MS TOF. NMR spectra were taken using TMS (<sup>1</sup>H,  $\delta = 0$ ), CDCl<sub>3</sub>(<sup>1</sup>H,  $\delta = 7.26$ ) and CDCl<sub>3</sub>(<sup>13</sup>C, CPD  $\delta = 77.0$ ) as the internal standards, respectively. Column chromatography was generally performed on silica gel (300-400 mesh) and reactions were monitored by thin layer chromatography (TLC) using UV light to visualize the course of the reactions.

### General procedures for the synthesis of (*E*)-vinyl sulfone derivatives

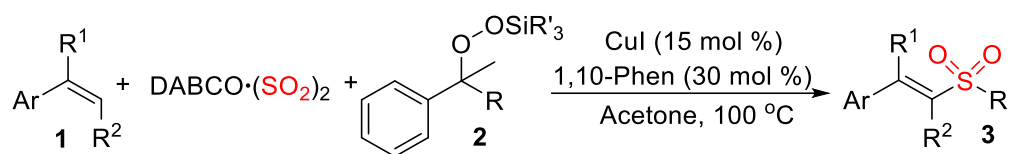

Alkene **1** (0.2 mmol), DABCO·(SO<sub>2</sub>)<sub>2</sub> (0.3 mmol, 1.5 equiv), CuI (0.03 mmol, 15 mol %) and 1,10-phenanthroline (0.06 mmol, 30 mol %) were added sequentially into Schlenk tube under nitrogen. Then, alkylsilyl peroxide **2** (0.6 mmol, 3.0 equiv) and acetone (1 mL) were added rapidly by syringe. The resulting mixture was allowed to stir at 100 °C in the oil bath for 3 hours. Upon completion, the solvent was removed under vacuum and the residue was purified by flash column chromatography to afford product **3**.

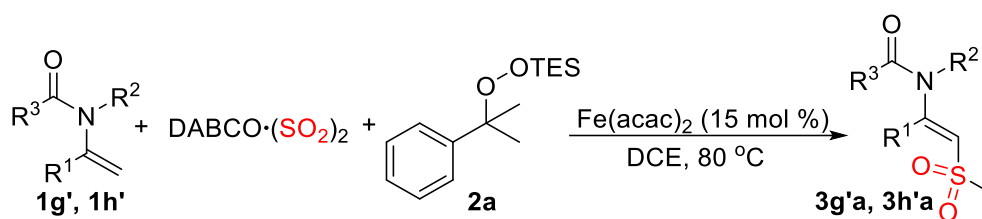

Enamide **1g'** or **1h'** (0.2 mmol), DABCO·(SO<sub>2</sub>)<sub>2</sub> (0.3 mmol, 1.5 equiv), Fe(acac)<sub>2</sub> (0.03 mmol, 15 mol %) were added sequentially into Schlenk tube under nitrogen. Then, triethyl((2-phenylpropan-2-yl)peroxy)silane **2a** (0.6 mmol, 3.0 equiv) and 1,2-dichloroethane (1 mL) were added rapidly by syringe. The resulting mixture was allowed to stir at 80 °C in the oil bath for 12 hours. Upon completion, the solvent was removed under vacuum and the residue was purified by flash column chromatography to afford product **3g'a** or **3h'a**.

**Gram-scale and gram-scale synthesis of 3aa**

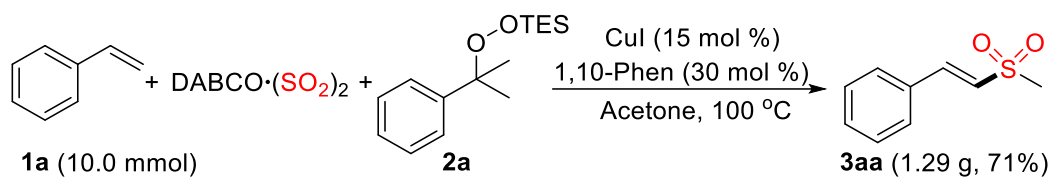

DABCO·(SO<sub>2</sub>)<sub>2</sub> (15.0 mmol, 1.5 equiv), CuI (1.5 mmol, 15 mol %) and 1,10-phenanthroline (3.0 mmol, 30 mol %) were added sequentially into Schlenk tube under nitrogen. Then, styrene **1a** (10.0 mmol), triethyl((2-phenylpropan-2-yl)peroxy)silane **2a** (30.0 mmol, 3.0 equiv) and acetone (50 mL) were added rapidly by syringe. The resulting mixture was allowed to stir at 100 °C in the oil bath for 3 hours. Upon completion, the solvent was removed under vacuum and the residue was purified by flash column chromatography to afford product **3aa** (1.29 g, 71%).

### Optimization of reaction conditions<sup>a</sup>

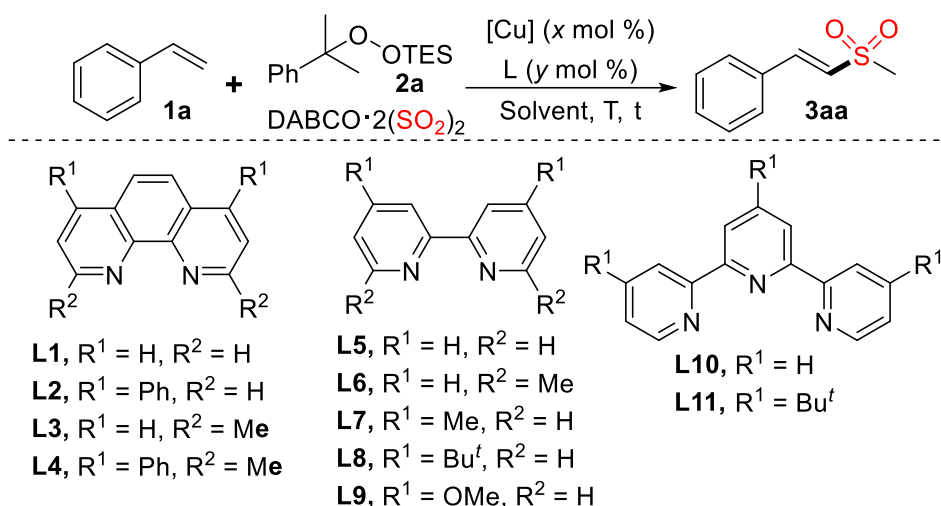

| Entry           | [Cu] (mol %)                               | L (mol %)       | Solvent     | T (°C) | t (h) | Yield (%) <sup>b</sup> |
|-----------------|--------------------------------------------|-----------------|-------------|--------|-------|------------------------|
| 1               | CuCl (10)                                  | <b>L1</b> (15)  | MeCN        | 80     | 12    | 10                     |
| 2               | CuBr (10)                                  | <b>L1</b> (15)  | MeCN        | 80     | 12    | 17                     |
| 3               | CuI (10)                                   | <b>L1</b> (15)  | MeCN        | 80     | 12    | 25                     |
| 4               | CuOAc (10)                                 | <b>L1</b> (15)  | MeCN        | 80     | 12    | 9                      |
| 5               | CuTc (10)                                  | <b>L1</b> (15)  | MeCN        | 80     | 12    | Trace                  |
| 6               | CuCN (10)                                  | <b>L1</b> (15)  | MeCN        | 80     | 12    | Trace                  |
| 7               | CuOTf (10)                                 | <b>L1</b> (15)  | MeCN        | 80     | 12    | Trace                  |
| 8               | Cu(MeCN) <sub>4</sub> BF <sub>4</sub> (10) | <b>L1</b> (15)  | MeCN        | 80     | 12    | 8                      |
| 9               | Cu(MeCN) <sub>4</sub> PF <sub>6</sub> (10) | <b>L1</b> (15)  | MeCN        | 80     | 12    | 9                      |
| 10              | CuCl <sub>2</sub> (10)                     | <b>L1</b> (15)  | MeCN        | 80     | 12    | 13                     |
| 11              | CuBr <sub>2</sub> (10)                     | <b>L1</b> (15)  | MeCN        | 80     | 12    | 18                     |
| 12              | Cu(acac) <sub>2</sub> (10)                 | <b>L1</b> (15)  | MeCN        | 80     | 12    | Trace                  |
| 13              | CuI (10)                                   | <b>L2</b> (15)  | MeCN        | 80     | 12    | 23                     |
| 14              | CuI (10)                                   | <b>L3</b> (15)  | MeCN        | 80     | 12    | 18                     |
| 15              | CuI (10)                                   | <b>L4</b> (15)  | MeCN        | 80     | 12    | 15                     |
| 16              | CuI (10)                                   | <b>L5</b> (15)  | MeCN        | 80     | 12    | 22                     |
| 17              | CuI (10)                                   | <b>L6</b> (15)  | MeCN        | 80     | 12    | 12                     |
| 18              | CuI (10)                                   | <b>L7</b> (15)  | MeCN        | 80     | 12    | 20                     |
| 19              | CuI (10)                                   | <b>L8</b> (15)  | MeCN        | 80     | 12    | 19                     |
| 20              | CuI (10)                                   | <b>L9</b> (15)  | MeCN        | 80     | 12    | 23                     |
| 21              | CuI (10)                                   | <b>L10</b> (15) | MeCN        | 80     | 12    | 23                     |
| 22              | CuI (10)                                   | <b>L11</b> (15) | MeCN        | 80     | 12    | 23                     |
| 23              | CuI (10)                                   | <b>L1</b> (15)  | EA          | 80     | 12    | 8                      |
| 24              | CuI (10)                                   | <b>L1</b> (15)  | Acetone     | 80     | 12    | 31                     |
| 25              | CuI (10)                                   | <b>L1</b> (15)  | DMSO        | 80     | 12    | 13                     |
| 26              | CuI (10)                                   | <b>L1</b> (15)  | DMF         | 80     | 12    | N.D.                   |
| 27              | CuI (10)                                   | <b>L1</b> (15)  | DCE         | 80     | 12    | 17                     |
| 28              | CuI (10)                                   | <b>L1</b> (15)  | Toluene     | 80     | 12    | 14                     |
| 29              | CuI (10)                                   | <b>L1</b> (15)  | 1,4-dioxane | 80     | 12    | N.D.                   |
| 30              | CuI (10)                                   | <b>L1</b> (15)  | Acetone     | 80     | 6     | 33                     |
| 31              | CuI (10)                                   | <b>L1</b> (15)  | Acetone     | 80     | 3     | 32                     |
| 32              | CuI (10)                                   | <b>L1</b> (15)  | Acetone     | 80     | 1     | 20                     |
| 33              | CuI (10)                                   | <b>L1</b> (15)  | Acetone     | 60     | 3     | 8                      |
| 34              | CuI (10)                                   | <b>L1</b> (15)  | Acetone     | 100    | 3     | 36                     |
| 35              | CuI (10)                                   | <b>L1</b> (15)  | Acetone     | 120    | 3     | 34                     |
| 36 <sup>c</sup> | CuI (10)                                   | <b>L1</b> (15)  | Acetone     | 100    | 3     | 30                     |

|                       |                 |                  |                |            |          |           |
|-----------------------|-----------------|------------------|----------------|------------|----------|-----------|
| 37 <sup>d</sup>       | CuI (10)        | <b>L1</b> (15)   | Acetone        | 100        | 3        | 51        |
| 38 <sup>e</sup>       | CuI (10)        | <b>L1</b> (15)   | Acetone        | 100        | 3        | 58        |
| 39 <sup>e,f</sup>     | CuI (10)        | <b>L1</b> (15)   | Acetone        | 100        | 3        | 36        |
| 40 <sup>e,g</sup>     | CuI (10)        | <b>L1</b> (15)   | Acetone        | 100        | 3        | 46        |
| 41 <sup>e</sup>       | CuI (5)         | <b>L1</b> (7.5)  | Acetone        | 100        | 3        | 37        |
| 42 <sup>e</sup>       | CuI (15)        | <b>L1</b> (22.5) | Acetone        | 100        | 3        | 78        |
| 43 <sup>e</sup>       | CuI (20)        | <b>L1</b> (30)   | Acetone        | 100        | 3        | 76        |
| 44 <sup>e</sup>       | CuI (15)        | <b>L1</b> (15)   | Acetone        | 100        | 3        | 26        |
| 45 <sup>e</sup>       | CuI (15)        | <b>L1</b> (18)   | Acetone        | 100        | 3        | 58        |
| <b>46<sup>e</sup></b> | <b>CuI (15)</b> | <b>L1 (30)</b>   | <b>Acetone</b> | <b>100</b> | <b>3</b> | <b>81</b> |

<sup>a</sup> Reaction conditions: styrene **1a** (0.2 mmol), alkylsilyl peroxide **2a**, DABCO·(SO<sub>2</sub>)<sub>2</sub>, Cu-catalyst, ligand, solvent (1.0 mL), N<sub>2</sub>, in oil bath. <sup>b</sup> GC yield using dodecane as internal standard. <sup>c</sup> GC yield using dodecane as internal standard. <sup>d</sup> 1.2 equiv of **2a** was used. <sup>e</sup> 2.0 equiv of **2a** was used. <sup>f</sup> 3.0 equiv of **2a** was used. <sup>g</sup> 1.2 equiv of DABCO·(SO<sub>2</sub>)<sub>2</sub> was used. <sup>h</sup> 2.0 equiv of DABCO·(SO<sub>2</sub>)<sub>2</sub> was used.

## References

1. (a) R. Sakamoto, S. Sakurai, K. Maruoka, *Chem. Eur. J.* **2017**, *23*, 9030; (b) J.-C. Yang, L. Chen, F. Yang, P. Li, L.-N. Guo, *Org. Chem. Front.* **2019**, *6*, 2792.
2. F.-S. He, X. Gong, P. Rojsitthisak, J. Wu, *J. Org. Chem.* **2019**, *84*, 13159.
3. X. Gao, X. Pan, J. Gao, H. Huang, G. Yuan, Y. Li, *Chem. Commun.* **2015**, *51*, 210.
4. A. Battace, T. Zair, H. Doucet, M. Santelli, *Synthesis* **2006**, 3495.
5. J.-Y. Chen, X.-L. Chen, X. Li, L.-B. Qu, Q. Zhang, L.-K. Duan, Y.-Y. Xia, X. Chen, K. Sun, Z.-D. Liu, Y.-F. Zhao, *Eur. J. Org. Chem.* **2015**, 314.
6. M.-Y. Chang, Y.-S. Wu, Y.-T. Hsiao, *Synthesis* **2018**, *50*, 4651.
7. H.-M. Guo, B.-Q. He, X. Wu, *Org. Lett.* **2022**, *24*, 3199.
8. H. Jiang, X. Chen, Y. Zhang, S. Yu, *Adv. Synth. Catal.* **2013**, *355*, 809.
9. Y. Xu, X. Tang, W. Hu, W. Wu, H. Jiang, *Green Chem.* **2014**, *16*, 3720.
10. M. Pramanik, K. Choudhuri, P. Mal, *Asian J. Org. Chem.* **2019**, *8*, 144.
11. L. K. Liu, C. T. Hong, *J. Chinese Chem. Soc.* **1978**, *25*, 87.
12. N. Jeremias, L.-M. Mohr, T. Bach, *Org. Lett.* **2021**, *23*, 5674.
13. T. Zhu, J. Shen, Y. Sun, J. Wu, *Chem. Commun.* **2021**, *57*, 915.

### Characterization data for compounds

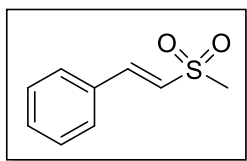

(*E*)-2-(2-(methylsulfonyl)vinyl)benzene (**3aa**)<sup>2</sup>: 28.1 mg, 77%, white solid, m.p.: 75.2 – 77.5 °C. *n*-hexane/ethyl acetate = 3/1 – 2/1 as an eluent. <sup>1</sup>H NMR (400 MHz, CDCl<sub>3</sub>) δ ppm 7.63 (d, *J* = 15.5 Hz, 1H), 7.50 – 7.55 (m, 2H), 7.49 – 7.39 (m, 3H), 6.94 (d, *J* = 15.5 Hz, 1H), 3.05 (s, 3H); <sup>13</sup>C NMR (100 MHz, CDCl<sub>3</sub>) δ ppm 143.9, 131.9, 131.3, 129.1, 128.5, 126.0, 43.19.

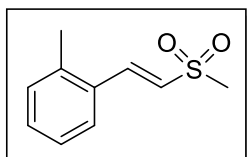

(*E*)-1-methyl-2-(2-(methylsulfonyl)vinyl)benzene (**3ba**)<sup>3</sup>: 29.3 mg, 75%, light yellow solid, m.p.: 78.0 – 80.7 °C. *n*-hexane/ethyl acetate = 3/1 – 2/1 as an eluent. <sup>1</sup>H NMR (400 MHz, CDCl<sub>3</sub>) δ ppm 7.91 (d, *J* = 15.4 Hz, 1H), 7.54 – 7.49 (m, 1H), 7.37 – 7.31 (m, 1H), 7.28 – 7.20 (m, 2H), 6.86 (d, *J* = 15.4 Hz, 1H), 3.05 (s, 3H), 2.45 (s, 3H); <sup>13</sup>C NMR (100 MHz, CDCl<sub>3</sub>) δ ppm 141.5, 138.2, 131.1, 131.0, 130.8, 126.9, 126.8, 126.5, 43.2, 19.7.

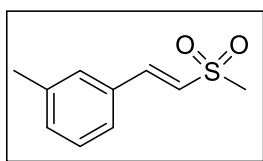

(*E*)-1-methyl-3-(2-(methylsulfonyl)vinyl)benzene (**3ca**)<sup>3</sup>: 29.6 mg, 75%, light yellow oil, *n*-hexane/ethyl acetate = 3/1 – 2/1 as an eluent. <sup>1</sup>H NMR (400 MHz, CDCl<sub>3</sub>) δ ppm 7.59 (d, *J* = 15.4 Hz, 1H), 7.36 – 7.22 (m, 4H), 6.93 (d, *J* = 15.4 Hz, 1H), 3.04 (s, 3H), 2.38 (s, 3H); <sup>13</sup>C NMR (100 MHz, CDCl<sub>3</sub>) δ ppm 144.0, 138.8, 132.1, 131.9, 129.1, 128.9, 125.75, 125.68, 43.2, 21.2.



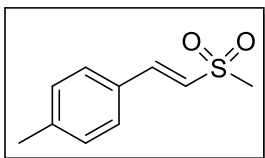

(*E*)-1-methyl-4-(2-(methylsulfonyl)vinyl)benzene (**3da**)<sup>2</sup>: 32.6 mg, 83%, white solid, m.p.: 105.1 – 107.7 °C. *n*-hexane/ethyl acetate = 3/1 – 2/1 as an eluent. <sup>1</sup>H NMR (400 MHz, CDCl<sub>3</sub>) δ ppm 7.59 (d, *J* = 15.4 Hz, 1H), 7.41 (d, *J* = 7.9 Hz, 2H), 7.23 (d, *J* = 7.8 Hz, 2H), 6.88 (d, *J* = 15.4 Hz, 1H), 3.03 (s, 3H), 2.39 (s, 3H); <sup>13</sup>C NMR (100 MHz, CDCl<sub>3</sub>) δ ppm 143.9, 142.0, 129.8, 129.2, 128.5, 124.8, 43.3, 21.5.

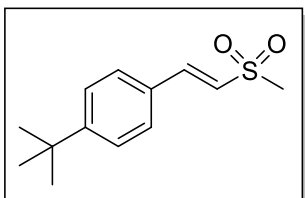

(*E*)-1-(*tert*-butyl)-4-(2-(methylsulfonyl)vinyl)benzene (**3ea**)<sup>2</sup>: 32.1 mg, 67%, light yellow solid, m.p.: 87.3 – 90.1 °C. *n*-hexane/ethyl acetate = 3/1 as an eluent. <sup>1</sup>H NMR (400 MHz, CDCl<sub>3</sub>) δ ppm 7.61 (d, *J* = 15.4 Hz, 1H), 7.49 – 7.41 (m, 4H), 6.91 (d, *J* = 15.5 Hz, 1H), 3.03 (s, 3H), 1.33 (s, 9H); <sup>13</sup>C NMR (100 MHz, CDCl<sub>3</sub>) δ ppm 155.0, 143.8, 129.2, 128.4, 126.1, 125.0, 43.3 34.9, 31.0.

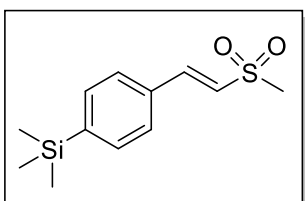

(*E*)-trimethyl(4-(2-(methylsulfonyl)vinyl)phenyl)silane (**3fa**): 36.6 mg, 72%, white solid, m.p.: 89.1 – 91.1 °C. *n*-hexane/ethyl acetate = 3/1 as an eluent. <sup>1</sup>H NMR (400 MHz, CDCl<sub>3</sub>) δ ppm 7.63 (d, *J* = 15.5 Hz, 1H), 7.58 (d, *J* = 8.0 Hz, 2H), 7.49 (d, *J* = 7.9 Hz, 2H), 6.96 (d, *J* = 15.4 Hz, 1H), 3.04 (s, 3H), 0.28 (s, 9H); <sup>13</sup>C NMR (100 MHz, CDCl<sub>3</sub>) δ ppm 145.2, 144.0, 134.0, 132.0, 127.6, 126.1, 43.2, -1.4; HRMS (ESI) *m/z*: [M+Na]<sup>+</sup> calcd for C<sub>12</sub>H<sub>18</sub>NaO<sub>2</sub>SSi<sup>+</sup> 277.0689, found 277.0691.

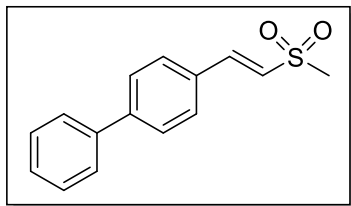

(*E*)-4-(2-(methylsulfonyl)vinyl)-1,1'-biphenyl (**3ga**): 33.9 mg, 66%, white solid, m.p.: 181.8 – 183.7 °C. *n*-hexane/ethyl acetate = 3/1 – 2/1 as an eluent. <sup>1</sup>H NMR (400 MHz, CDCl<sub>3</sub>) δ ppm 7.70 – 7.63 (m, 3H), 7.63 – 7.56 (m, 4H), 7.47 (t, *J* = 7.5 Hz, 2H), 7.39 (t, *J* = 7.3 Hz, 1H), 6.96 (d, *J* = 15.4 Hz, 1H), 3.06 (s, 3H); <sup>13</sup>C NMR (100 MHz, CDCl<sub>3</sub>) δ ppm 144.1, 143.5, 139.7, 130.9, 129.0, 128.9, 128.1, 127.7, 127.0, 125.8, 43.3; HRMS (ESI) *m/z*: [M+Na]<sup>+</sup> calcd for C<sub>15</sub>H<sub>14</sub>NaO<sub>2</sub>S<sup>+</sup> 281.0607, found 281.0615.

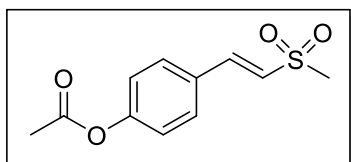

(*E*)-4-(2-(methylsulfonyl)vinyl)phenyl acetate (**3ha**): 31.4 mg, 65%, white solid, m.p.: 92.6 – 95.4 °C. *n*-hexane/ethyl acetate = 3/1 – 2/1 as an eluent. <sup>1</sup>H NMR (400 MHz, CDCl<sub>3</sub>) δ ppm 7.60 (d, *J* = 15.5 Hz, 1H), 7.54 (d, *J* = 8.6 Hz, 2H), 7.17 (d, *J* = 8.6 Hz, 2H), 6.90 (d, *J* = 15.4 Hz, 1H), 3.04 (s, 3H), 2.32 (s, 3H); <sup>13</sup>C NMR (100 MHz, CDCl<sub>3</sub>) δ ppm 168.9, 152.8, 142.8, 129.7, 129.6, 126.2, 122.4, 43.2, 21.1; HRMS (ESI) *m/z*: [M+Na]<sup>+</sup> calcd for C<sub>11</sub>H<sub>12</sub>NaO<sub>4</sub>S<sup>+</sup> 263.0349, found 263.0361.

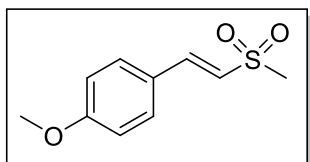

(*E*)-1-methoxy-4-(2-(methylsulfonyl)vinyl)benzene (**3ia**)<sup>3</sup>: 19.2 mg, 45%, white solid, m.p.: 130.5 – 133.1 °C. *n*-hexane/ethyl acetate = 3/1 – 2/1 as an eluent. <sup>1</sup>H NMR (400 MHz, CDCl<sub>3</sub>) δ ppm 7.57 (d, *J* = 15.4 Hz, 1H), 7.47 (d, *J* = 8.8 Hz, 2H), 6.93 (d, *J* = 8.8 Hz, 2H), 6.78 (d, *J* = 15.4 Hz, 1H), 3.85 (s, 3H), 3.03 (s, 3H); <sup>13</sup>C NMR (100 MHz, CDCl<sub>3</sub>) δ ppm 162.1, 143.2, 130.3, 124.6, 123.2, 114.5, 55.4, 43.4.

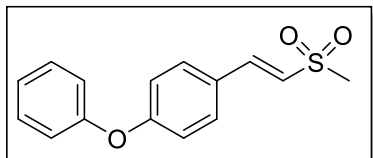

(*E*)-1-(2-(methylsulfonyl)vinyl)-4-phenoxybenzene (**3ja**): 32.7 mg, 60%, light yellow solid, m.p.: 98.8 – 101.2 °C. *n*-hexane/ethyl acetate = 3/1 as an eluent. <sup>1</sup>H NMR (400 MHz, CDCl<sub>3</sub>) δ ppm 7.59 (d, *J* = 15.4 Hz, 1H), 7.48 (d, *J* = 8.7 Hz, 2H), 7.39 (t, *J* = 7.9 Hz, 2H), 7.23 – 7.15 (m, 1H), 7.06 (d, *J* = 7.7 Hz, 2H), 7.02 – 6.97 (m, 2H), 6.83 (d, *J* = 15.4 Hz, 1H), 3.03 (s, 3H); <sup>13</sup>C NMR (100 MHz, CDCl<sub>3</sub>) δ ppm 160.5, 155.5, 143.2, 130.3, 130.0, 126.4, 124.44, 124.41, 119.9, 118.2, 43.3; HRMS (ESI) *m/z*: [M+Na]<sup>+</sup> calcd for C<sub>15</sub>H<sub>14</sub>NaO<sub>3</sub>S<sup>+</sup> 297.0556, found 297.0567.

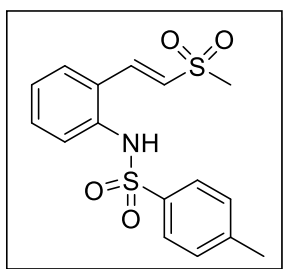

(*E*)-4-methyl-*N*-(2-(2-(methylsulfonyl)vinyl)phenyl)benzenesulfonamide (**3ka**): 21.7 mg, 31%, white solid, m.p.: 132.4 – 134.2 °C. *n*-hexane/ethyl acetate = 2/1 as an eluent. <sup>1</sup>H NMR (400 MHz, CDCl<sub>3</sub>) δ ppm 7.67 (d, *J* = 15.4 Hz, 1H), 7.57 (d, *J* = 8.0 Hz, 2H), 7.50 (d, *J* = 7.7 Hz, 1H), 7.36 (t, *J* = 7.6 Hz, 1H), 7.31 – 7.19 (m, 5H), 6.82 (d, *J* = 15.4 Hz, 1H), 3.03 (s, 3H), 2.38 (s, 3H); <sup>13</sup>C NMR (100 MHz, CDCl<sub>3</sub>) δ ppm 144.2, 139.3, 135.7, 135.2, 131.9, 129.8, 128.7, 128.2, 127.59, 127.57, 127.5, 127.2, 43.1, 21.6; HRMS (ESI) *m/z*: [M+Na]<sup>+</sup> calcd for C<sub>16</sub>H<sub>17</sub>NNaO<sub>4</sub>S<sub>2</sub><sup>+</sup> 374.0491, found 374.0501.

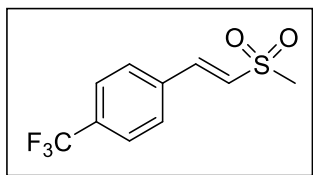

(*E*)-1-(2-(methylsulfonyl)vinyl)-4-(trifluoromethyl)benzene (**3la**)<sup>2</sup>: 40.7 mg, 81%, light yellow solid, m.p.: 137.8 – 140.6 °C. *n*-hexane/ethyl acetate = 3/1 as an eluent. <sup>1</sup>H

NMR (400 MHz, CDCl<sub>3</sub>)  $\delta$  ppm 7.77 – 7.60 (m, 5H), 7.06 (d,  $J$  = 15.5 Hz, 1H), 3.08 (s, 3H); <sup>13</sup>C NMR (100 MHz, CDCl<sub>3</sub>)  $\delta$  ppm 142.0, 135.4, 137 (q,  $J$  = 32.7 Hz), 128.7, 126.1 (q,  $J$  = 3.7 Hz), 123.5 (q,  $J$  = 270.7 Hz), 43.0; <sup>19</sup>F NMR (376 MHz, CDCl<sub>3</sub>)  $\delta$  ppm -62.96 (s).

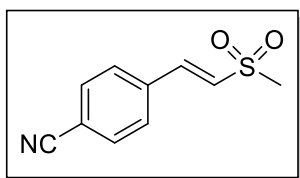

(*E*)-4-(2-(methylsulfonyl)vinyl)benzonitrile (**3ma**)<sup>3</sup>: 22.7 mg, 55%, light yellow solid, m.p.: 162.0 – 164.6 °C. *n*-hexane/ethyl acetate = 3/1 as an eluent. <sup>1</sup>H NMR (400 MHz, CDCl<sub>3</sub>)  $\delta$  ppm 7.74 (d,  $J$  = 8.3 Hz, 2H), 7.68 – 7.61 (m, 3H), 7.06 (d,  $J$  = 15.5 Hz, 1H), 3.08 (s, 3H); <sup>13</sup>C NMR (100 MHz, CDCl<sub>3</sub>)  $\delta$  ppm 141.5, 136.2, 132.8, 129.7, 128.9, 117.9, 114.5, 43.0.

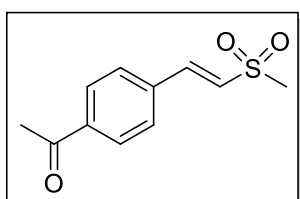

(*E*)-1-(4-(2-(methylsulfonyl)vinyl)phenyl)ethan-1-one (**3na**)<sup>4</sup>: 22.6 mg, 50%, white solid, m.p.: 140.2 – 141.6 °C. *n*-hexane/ethyl acetate = 2/1 as an eluent. <sup>1</sup>H NMR (400 MHz, CDCl<sub>3</sub>)  $\delta$  ppm 8.01 (d,  $J$  = 8.1 Hz, 2H), 7.71 – 7.59 (m, 3H), 7.06 (d,  $J$  = 15.4 Hz, 1H), 3.08 (s, 3H), 2.64 (s, 3H); <sup>13</sup>C NMR (100 MHz, CDCl<sub>3</sub>)  $\delta$  ppm 197.1, 142.3, 138.7, 136.2, 128.9, 128.6, 128.5, 43.1, 26.7.

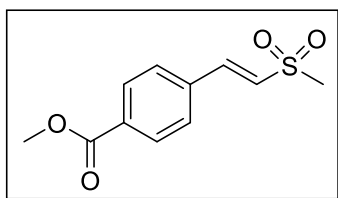

methyl (*E*)-4-(2-(methylsulfonyl)vinyl)benzoate (**3oa**)<sup>3</sup>: 28.4 mg, 59%, white solid, m.p.: 120.0 – 122.2 °C. *n*-hexane/ethyl acetate = 2/1 as an eluent. <sup>1</sup>H NMR (400 MHz,

CDCl<sub>3</sub>)  $\delta$  ppm 8.09 (d,  $J$  = 8.3 Hz, 2H), 7.66 (d,  $J$  = 15.5 Hz, 1H), 7.59 (d,  $J$  = 8.2 Hz, 2H), 7.04 (d,  $J$  = 15.5 Hz, 1H), 3.95 (s, 3H), 3.07 (s, 3H); <sup>13</sup>C NMR (100 MHz, CDCl<sub>3</sub>)  $\delta$  ppm 166.1, 142.5, 136.1, 132.3, 130.2, 128.43, 128.41, 52.4, 43.1.

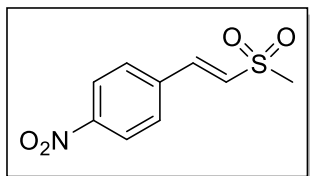

(*E*)-1-(2-(methylsulfonyl)vinyl)-4-nitrobenzene (**3pa**)<sup>3</sup>: 24.9 mg, 55%, light yellow solid, m.p.: 185.0 – 188.0 °C. *n*-hexane/ethyl acetate = 2/1 as an eluent. <sup>1</sup>H NMR (400 MHz, CDCl<sub>3</sub>)  $\delta$  ppm 8.31 (d,  $J$  = 8.8 Hz, 2H), 7.76 – 7.65 (m, 3H), 7.09 (d,  $J$  = 15.5 Hz, 1H), 3.09 (s, 3H); <sup>13</sup>C NMR (100 MHz, CDCl<sub>3</sub>)  $\delta$  ppm 149.1, 141.1, 138.0, 130.3, 129.3, 124.4, 43.0.

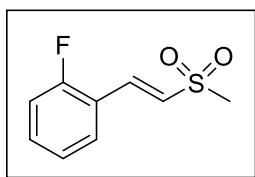

(*E*)-1-fluoro-2-(2-(methylsulfonyl)vinyl)benzene (**3qa**)<sup>5</sup>: 28.2 mg, 70%, light yellow oil, *n*-hexane/ethyl acetate = 3/1 as an eluent. <sup>1</sup>H NMR (400 MHz, CDCl<sub>3</sub>)  $\delta$  ppm 7.70 (d,  $J$  = 15.6 Hz, 1H), 7.54 – 7.41 (m, 2H), 7.22 (t,  $J$  = 7.6 Hz, 1H), 7.18 – 7.08 (m, 2H), 3.06 (s, 3H); <sup>13</sup>C NMR (100 MHz, CDCl<sub>3</sub>)  $\delta$  ppm 161.5 (d,  $J$  = 254.0 Hz), 137.0 (d,  $J$  = 2.0 Hz), 132.9 (d,  $J$  = 9.0 Hz), 130.4 (d,  $J$  = 3.0 Hz), 129.0 (d,  $J$  = 9.0 Hz), 124.7 (d,  $J$  = 4.0 Hz), 120.1 (d,  $J$  = 12.0 Hz), 116.4 (d,  $J$  = 21.0 Hz), 43.1; <sup>19</sup>F NMR (376 MHz, CDCl<sub>3</sub>)  $\delta$  ppm -112.23 (dt,  $J$  = 12.0, 6.1 Hz).

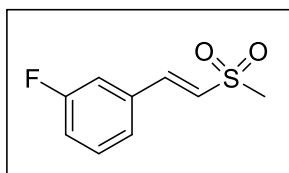

(*E*)-1-fluoro-3-(2-(methylsulfonyl)vinyl)benzene (**3ra**)<sup>5</sup>: 26.0 mg, 65%, light yellow solid, m.p.: 82.2 – 84.6 °C. *n*-hexane/ethyl acetate = 3/1 as an eluent. <sup>1</sup>H NMR (400

MHz, CDCl<sub>3</sub>)  $\delta$  ppm 7.60 (d,  $J$  = 15.4 Hz, 1H), 7.42 (td,  $J$  = 8.0, 5.7 Hz, 1H), 7.31 (dt,  $J$  = 7.7, 1.3 Hz, 1H), 7.23 (dt,  $J$  = 9.4, 1.7 Hz, 1H), 7.16 (tdd,  $J$  = 8.3, 2.6, 1.1 Hz, 1H), 6.95 (d,  $J$  = 15.4 Hz, 1H), 3.06 (s, 3H); <sup>13</sup>C NMR (100 MHz, CDCl<sub>3</sub>)  $\delta$  ppm 162.9 (d,  $J$  = 246.0 Hz), 142.5 (d,  $J$  = 2.0 Hz), 134.1 (d,  $J$  = 8.0 Hz), 130.8 (d,  $J$  = 8.0 Hz), 127.5, 124.6 (d,  $J$  = 3.0 Hz), 118.3 (d,  $J$  = 21.0 Hz), 114.8 (d,  $J$  = 22.0 Hz), 43.1; <sup>19</sup>F NMR (376 MHz, CDCl<sub>3</sub>)  $\delta$  ppm -111.62 (td,  $J$  = 8.8, 5.9 Hz).

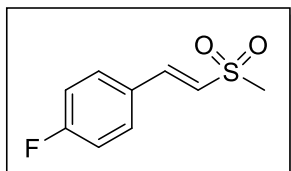

(*E*)-1-fluoro-4-(2-(methylsulfonyl)vinyl)benzene (**3sa**)<sup>2</sup>: 28.8 mg, 72%, white solid, m.p.: 122.5 – 124.6 °C. *n*-hexane/ethyl acetate = 3/1 as an eluent. <sup>1</sup>H NMR (400 MHz, CDCl<sub>3</sub>)  $\delta$  ppm 7.60 (d,  $J$  = 15.5 Hz, 1H), 7.56 – 7.50 (m, 2H), 7.18 – 7.08 (m, 2H), 6.88 (d,  $J$  = 15.5 Hz, 1H), 3.05 (s, 3H); <sup>13</sup>C NMR (100 MHz, CDCl<sub>3</sub>)  $\delta$  ppm 164.4 (d,  $J$  = 252.0 Hz), 142.6, 130.6 (d,  $J$  = 8.0 Hz), 128.2 (d,  $J$  = 3.0 Hz), 125.8 (d,  $J$  = 3.0 Hz), 116.3 (d,  $J$  = 21.0 Hz), 43.2; <sup>19</sup>F NMR (376 MHz, CDCl<sub>3</sub>)  $\delta$  ppm -107.42 (tt,  $J$  = 9.1, 5.5 Hz).

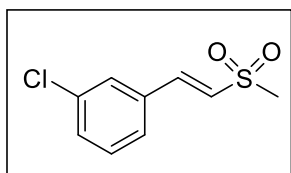

(*E*)-1-chloro-3-(2-(methylsulfonyl)vinyl)benzene (**3ta**): 32.5 mg, 75%, white solid, m.p.: 69.7 – 70.2 °C. *n*-hexane/ethyl acetate = 3/1 as an eluent. <sup>1</sup>H NMR (400 MHz, CDCl<sub>3</sub>)  $\delta$  ppm 7.57 (d,  $J$  = 15.5 Hz, 1H), 7.51 (t,  $J$  = 1.8 Hz, 1H), 7.45 – 7.34 (m, 3H), 6.97 (d,  $J$  = 15.5 Hz, 1H), 3.06 (s, 3H); <sup>13</sup>C NMR (100 MHz, CDCl<sub>3</sub>)  $\delta$  ppm 142.2, 135.0, 133.7, 131.1, 130.3, 128.1, 127.6, 126.8, 43.1; HRMS (ESI)  $m/z$ : [M+Na]<sup>+</sup> calcd for C<sub>9</sub>H<sub>9</sub><sup>35</sup>ClNaO<sub>2</sub>S<sup>+</sup> 238.9904, found 238.9907; calcd for C<sub>9</sub>H<sub>9</sub><sup>37</sup>ClNaO<sub>2</sub>S<sup>+</sup> 240.9874, found 240.9879.

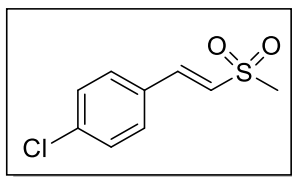

(*E*)-1-chloro-4-(2-(methylsulfonyl)vinyl)benzene (**3ua**)<sup>2</sup>: 33.9 mg, 78%, white solid, m.p.: 119.4 – 121.5 °C. *n*-hexane/ethyl acetate = 3/1 as an eluent. <sup>1</sup>H NMR (400 MHz, CDCl<sub>3</sub>) δ ppm 7.58 (d, *J* = 15.4 Hz, 1H), 7.50 – 7.44 (m, 2H), 7.43 – 7.37 (m, 2H), 6.93 (d, *J* = 15.5 Hz, 1H), 3.05 (s, 3H); <sup>13</sup>C NMR (100 MHz, CDCl<sub>3</sub>) δ ppm 142.5, 137.4, 130.5, 129.7, 129.4, 126.6, 43.2.

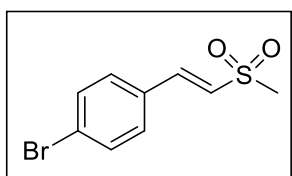

(*E*)-1-bromo-4-(2-(methylsulfonyl)vinyl)benzene (**3va**)<sup>2</sup>: 35.8 mg, 69%, white solid, m.p.: 120.3 – 122.5 °C. *n*-hexane/ethyl acetate = 3/1 as an eluent. <sup>1</sup>H NMR (400 MHz, CDCl<sub>3</sub>) δ ppm 7.63 – 7.50 (m, 3H), 7.39 (d, *J* = 8.5 Hz, 2H), 6.96 (d, *J* = 15.5 Hz, 1H), 3.05 (s, 3H); <sup>13</sup>C NMR (100 MHz, CDCl<sub>3</sub>) δ ppm 142.5, 132.3, 130.9, 129.8, 126.7, 125.7, 43.1.

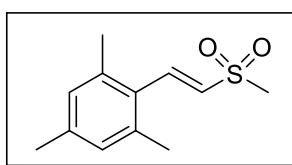

(*E*)-1,3,5-trimethyl-2-(2-(methylsulfonyl)vinyl)benzene (**3wa**)<sup>4</sup>: 18.0 mg, 40%, white solid, m.p.: 103.8 – 105.6 °C. *n*-hexane/ethyl acetate = 3/1 as an eluent. <sup>1</sup>H NMR (400 MHz, CDCl<sub>3</sub>) δ ppm 7.81 (d, *J* = 15.8 Hz, 1H), 6.92 (s, 2H), 6.62 (d, *J* = 15.8 Hz, 1H), 3.04 (s, 3H), 2.35 (s, 6H), 2.29 (s, 3H); <sup>13</sup>C NMR (100 MHz, CDCl<sub>3</sub>) δ ppm 142.0, 139.6, 137.1, 130.4, 129.5, 128.1, 43.2, 21.1, 21.0.

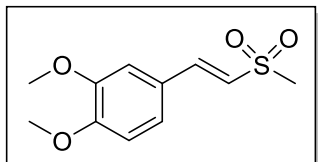

(*E*)-1,2-dimethoxy-4-(2-(methylsulfonyl)vinyl)benzene (**3xa**)<sup>6</sup>: 22.9 mg, 47%, white solid, m.p.: 116.5 – 118.7 °C. *n*-hexane/ethyl acetate = 2/1 – 1/1 as an eluent. <sup>1</sup>H NMR (400 MHz, CDCl<sub>3</sub>) δ ppm 7.55 (d, *J* = 15.4 Hz, 1H), 7.12 (dd, *J* = 8.3, 1.9 Hz, 1H), 7.02 (d, *J* = 2.0 Hz, 1H), 6.90 (d, *J* = 8.3 Hz, 1H), 6.81 (d, *J* = 15.3 Hz, 1H), 3.93 (d, *J* = 3.8 Hz, 6H), 3.04 (s, 3H); <sup>13</sup>C NMR (100 MHz, CDCl<sub>3</sub>) δ ppm 151.8, 149.2, 143.9, 124.8, 123.4, 123.4, 111.0, 109.8, 55.94, 55.87, 43.4.

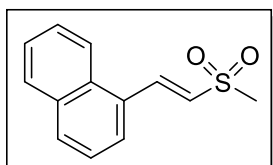

(*E*)-1-(2-(methylsulfonyl)vinyl)naphthalene (**3ya**)<sup>4</sup>: 20.0 mg, 43%, light yellow solid, m.p.: 114.2 – 116.3 °C. *n*-hexane/ethyl acetate = 3/1 as an eluent. <sup>1</sup>H NMR (400 MHz, CDCl<sub>3</sub>) δ ppm 8.47 (d, *J* = 15.1 Hz, 1H), 8.14 (d, *J* = 8.3 Hz, 1H), 7.95 (d, *J* = 8.2 Hz, 1H), 7.90 (d, *J* = 8.0 Hz, 1H), 7.73 (d, *J* = 7.2 Hz, 1H), 7.63 – 7.47 (m, 3H), 7.03 (d, *J* = 15.2 Hz, 1H), 3.10 (s, 3H); <sup>13</sup>C NMR (100 MHz, CDCl<sub>3</sub>) δ ppm 141.0, 133.6, 131.6, 131.2, 129.1, 128.8, 128.4, 127.3, 126.5, 125.7, 125.3, 122.9, 43.2.

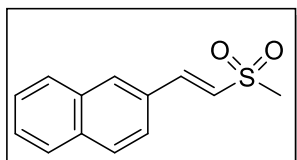

(*E*)-2-(2-(methylsulfonyl)vinyl)naphthalene (**3za**)<sup>3</sup>: 36.6 mg, 79%, light yellow solid, m.p.: 141.6 – 143.8 °C. *n*-hexane/ethyl acetate = 3/1 as an eluent. <sup>1</sup>H NMR (400 MHz, CDCl<sub>3</sub>) δ ppm 7.94 – 7.81 (m, 4H), 7.77 (d, *J* = 15.4 Hz, 1H), 7.63 – 7.50 (m, 3H), 7.04 (d, *J* = 15.4 Hz, 1H), 3.07 (s, 3H); <sup>13</sup>C NMR (100 MHz, CDCl<sub>3</sub>) δ ppm 143.9, 134.4, 133.0, 131.0, 129.4, 129.0, 128.6, 127.8, 127.7, 126.9, 126.0, 123.2, 43.3.



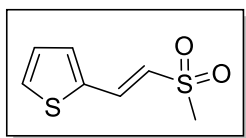

(*E*)-2-(2-(methylsulfonyl)vinyl)thiophene (**3a'a**)<sup>2</sup>: 19.9 mg, 53%, brown oil, *n*-hexane/ethyl acetate = 3/1 – 2/1 as an eluent. <sup>1</sup>H NMR (400 MHz, CDCl<sub>3</sub>) δ ppm 7.74 (d, *J* = 15.2 Hz, 1H), 7.49 (d, *J* = 5.1 Hz, 1H), 7.34 (d, *J* = 3.6 Hz, 1H), 7.10 (dd, *J* = 5.0, 3.7 Hz, 1H), 6.71 (d, *J* = 15.1 Hz, 1H), 3.04 (s, 3H); <sup>13</sup>C NMR (100 MHz, CDCl<sub>3</sub>) δ ppm 136.5, 136.5, 132.7, 130.1, 128.4, 124.1, 43.4.

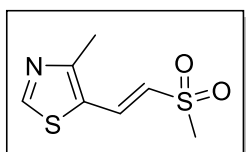

(*E*)-4-methyl-5-(2-(methylsulfonyl)vinyl)thiazole (**3b'a**)<sup>3</sup>: 10.2 mg, 25%, brown solid, m.p.: 115.2 – 117.8 °C. *n*-hexane/ethyl acetate = 3/1 – 2/1 as an eluent. <sup>1</sup>H NMR (400 MHz, CDCl<sub>3</sub>) δ ppm 8.80 (s, 1H), 7.77 (d, *J* = 15.0 Hz, 1H), 6.67 (d, *J* = 15.0 Hz, 1H), 3.06 (s, 3H), 2.60 (s, 3H); <sup>13</sup>C NMR (100 MHz, CDCl<sub>3</sub>) δ ppm 157.7, 154.0, 133.2, 126.8, 125.7, 43.3, 15.7.

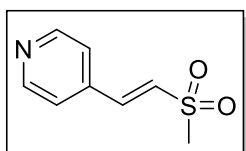

(*E*)-4-(2-(methylsulfonyl)vinyl)pyridine (**3c'a**): 11.0 mg, 30%, brown solid, m.p.: 121.9 – 122.5 °C. *n*-hexane/ethyl acetate = 1/1 as an eluent. <sup>1</sup>H NMR (400 MHz, CDCl<sub>3</sub>) δ ppm 8.77 (br, 2H), 7.59 (d, *J* = 15.5 Hz, 1H), 7.41 (br, 2H), 7.15 (d, *J* = 15.5 Hz, 1H), 3.08 (s, 3H); <sup>13</sup>C NMR (100 MHz, CDCl<sub>3</sub>) δ ppm 150.7, 141.1, 139.2, 130.9, 122.2, 42.9; HRMS (ESI) *m/z*: [M+Na]<sup>+</sup> calcd for C<sub>8</sub>H<sub>10</sub>NO<sub>2</sub>S<sup>+</sup> 184.0427, found 184.0434.

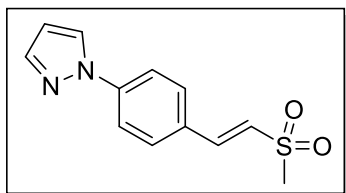

(*E*)-1-(4-(2-(methylsulfonyl)vinyl)phenyl)-1*H*-pyrazole (**3d'a**): 20.8 mg, 42%, light yellow solid, m.p.: 150.3 – 151.6 °C. *n*-hexane/ethyl acetate = 3/1 as an eluent. <sup>1</sup>H NMR (400 MHz, CDCl<sub>3</sub>) δ ppm 8.00 (s, 1H), 7.84 – 7.74 (m, 3H), 7.68 – 7.58 (m, 3H), 6.93 (d, *J* = 15.5 Hz, 1H), 6.52 (s, 1H), 3.06 (s, 3H); <sup>13</sup>C NMR (100 MHz, CDCl<sub>3</sub>) δ ppm 142.8, 142.0, 141.9, 129.9, 129.8, 126.7, 125.9, 119.1, 108.5, 43.3; HRMS (ESI) *m/z*: [M+Na]<sup>+</sup> calcd for C<sub>12</sub>H<sub>12</sub>N<sub>2</sub>NaO<sub>2</sub>S<sup>+</sup> 271.0512, found 271.0525.

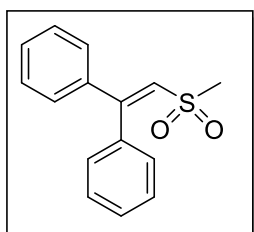

(2-(methylsulfonyl)ethene-1,1-diyl)dibenzene (**3e'a**)<sup>3</sup>: 12.4 mg, 24%, white solid, m.p.: 101.5 – 103.7 °C. *n*-hexane/ethyl acetate = 3/1 as an eluent. <sup>1</sup>H NMR (400 MHz, CDCl<sub>3</sub>) δ ppm 7.52 – 7.23 (m, 10H), 6.87 (s, 1H), 2.68 (s, 3H); <sup>13</sup>C NMR (100 MHz, CDCl<sub>3</sub>) δ ppm 154.8, 139.0, 135.6, 130.4, 129.8, 129.5, 128.7, 128.31, 128.29, 128.0, 43.2.

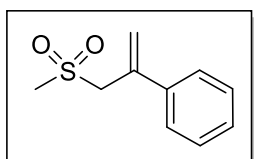

(3-(methylsulfonyl)prop-1-en-2-yl)benzene (**3f'a**)<sup>3</sup>: 12.6 mg, 32%, light yellow oil, *n*-hexane/ethyl acetate = 3/1 as an eluent. <sup>1</sup>H NMR (400 MHz, CDCl<sub>3</sub>) δ ppm 7.50 – 7.44 (m, 2H), 7.42 – 7.31 (m, 3H), 5.77 (s, 1H), 5.57 (s, 1H), 4.20 (s, 2H), 2.72 (s, 3H); <sup>13</sup>C NMR (100 MHz, CDCl<sub>3</sub>) δ ppm 138.6, 136.6, 128.8, 128.5, 126.2, 122.1, 60.7, 40.2.

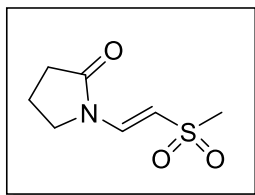

(*E*)-1-(2-(methylsulfonyl)vinyl)pyrrolidin-2-one (**3g'a**)<sup>8</sup>: 22.4 mg, 59%, light yellow solid, m.p.: 100.1 – 102.9 °C. *n*-hexane/ethyl acetate = 3/1 as an eluent. <sup>1</sup>H NMR (400 MHz, CDCl<sub>3</sub>) δ ppm 8.01 (d, *J* = 13.7 Hz, 1H), 5.79 (d, *J* = 13.7 Hz, 1H), 3.58 (t, *J* = 7.2 Hz, 2H), 3.00 (s, 3H), 2.58 (t, *J* = 8.2 Hz, 2H), 2.29 – 2.17 (m, 2H); <sup>13</sup>C NMR (100 MHz, CDCl<sub>3</sub>) δ ppm 174.3, 137.1, 108.8, 45.1, 44.4, 30.6, 17.4.

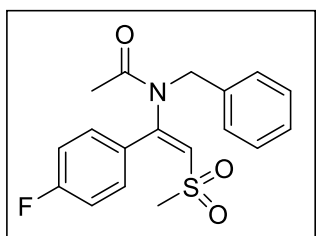

(*E*)-*N*-benzyl-*N*-(1-(4-fluorophenyl)-2-(methylsulfonyl)vinyl)acetamide (**3h'a**): 20.2 mg, 29%, white solid, m.p.: 113.9 – 116.7 °C. *n*-hexane/ethyl acetate = 3/1 -2/1 as an eluent. <sup>1</sup>H NMR (400 MHz, CDCl<sub>3</sub>) δ ppm 7.51 – 7.45 (m, 2H), 7.36 – 7.28 (m, 3H), 7.19 – 7.11 (m, 4H), 6.20 (s, 1H), 4.62 (s, 2H), 2.73 (s, 3H), 2.20 (s, 3H); <sup>13</sup>C NMR (100 MHz, CDCl<sub>3</sub>) δ ppm 170.1, 164.5 (d, *J* = 253.0 Hz), 150.9, 136.1, 132.1 (d, *J* = 9.0 Hz), 128.8, 128.3, 128.1 (d, *J* = 4.0 Hz), 128.0, 127.1, 116.0 (d, *J* = 22.0 Hz), 50.6, 43.3, 23.2; <sup>19</sup>F NMR (376 MHz, CDCl<sub>3</sub>) δ ppm -106.72 (tt, *J* = 8.8, 5.2 Hz); HRMS (ESI) *m/z*: [M+Na]<sup>+</sup> calcd for C<sub>18</sub>H<sub>18</sub>FNNaO<sub>3</sub>S<sup>+</sup> 370.0884, found 370.0883.

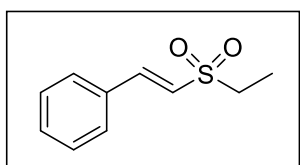

(*E*)-2-(ethylsulfonyl)vinylbenzene (**3ab**)<sup>9</sup>: 18.2 mg, 46%, light yellow solid, m.p.: 60.1 – 62.5 °C. *n*-hexane/ethyl acetate = 3/1 – 2/1 as an eluent. <sup>1</sup>H NMR (400 MHz, CDCl<sub>3</sub>) δ ppm 7.61 (d, *J* = 15.5 Hz, 1H), 7.56 – 7.50 (m, 2H), 7.48 – 7.40 (m, 3H), 6.83 (d, *J* = 15.5 Hz, 1H), 3.10 (q, *J* = 7.5 Hz, 2H), 1.39 (t, *J* = 7.5 Hz, 3H); <sup>13</sup>C NMR (100 MHz, CDCl<sub>3</sub>)

$\delta$  ppm 145.2, 132.2, 131.3, 129.1, 128.5, 123.9, 49.4, 7.2.

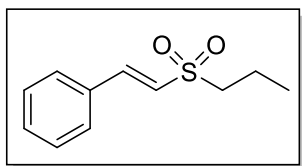

(*E*)-2-(propylsulfonyl)vinyl)benzene (**3ac**)<sup>7</sup>: 18.0 mg, 43%, colorless oil, *n*-hexane/ethyl acetate = 3/1 as an eluent. <sup>1</sup>H NMR (400 MHz, CDCl<sub>3</sub>)  $\delta$  ppm 7.60 (d, *J* = 15.5 Hz, 1H), 7.55 – 7.49 (m, 2H), 7.48 – 7.39 (m, 3H), 6.84 (d, *J* = 15.5 Hz, 1H), 3.12 – 2.99 (m, 2H), 1.94 – 1.81 (m, 2H), 1.07 (t, *J* = 7.5 Hz, 3H); <sup>13</sup>C NMR (100 MHz, CDCl<sub>3</sub>)  $\delta$  ppm 144.7, 132.2, 131.3, 129.1, 128.5, 124.7, 56.8, 16.3, 13.0.

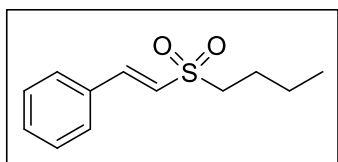

(*E*)-2-(propylsulfonyl)vinyl)benzene (**3ad**)<sup>10</sup>: 18.0 mg, 40%, light yellow oil, *n*-hexane/ethyl acetate = 3/1 as an eluent. <sup>1</sup>H NMR (400 MHz, CDCl<sub>3</sub>)  $\delta$  ppm 7.60 (d, *J* = 15.5 Hz, 1H), 7.55 – 7.50 (m, 2H), 7.46 – 7.39 (m, 3H), 6.85 (d, *J* = 15.5 Hz, 1H), 3.12 – 3.03 (m, 2H), 1.85 – 1.76 (m, 2H), 1.52 – 1.41 (m, 2H), 0.95 (t, *J* = 7.3 Hz, 3H); <sup>13</sup>C NMR (100 MHz, CDCl<sub>3</sub>)  $\delta$  ppm 144.6, 132.1, 131.2, 129.0, 128.5, 124.6, 54.8, 24.4, 21.5, 13.5.

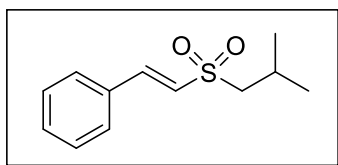

(*E*)-2-(isobutylsulfonyl)vinyl)benzene (**3ae**)<sup>11</sup>: 16.3 mg, 36%, colorless oil, *n*-hexane/ethyl acetate = 3/1 as an eluent. <sup>1</sup>H NMR (400 MHz, CDCl<sub>3</sub>)  $\delta$  ppm 7.60 (d, *J* = 15.5 Hz, 1H), 7.55 – 7.49 (m, 2H), 7.46 – 7.39 (m, 3H), 6.85 (d, *J* = 15.5 Hz, 1H), 2.98 (d, *J* = 6.5 Hz, 2H), 2.41 – 2.29 (m, 1H), 1.13 (d, *J* = 6.7 Hz, 6H); <sup>13</sup>C NMR (100 MHz,

CDCl<sub>3</sub>)  $\delta$  ppm 144.2, 132.2, 131.2, 129.1, 128.5, 125.6, 62.8, 24.0, 22.8.

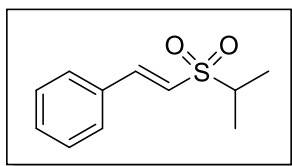

(*E*)-2-(isopropylsulfonyl)vinylbenzene (**3af**)<sup>12</sup>: 23.1 mg, 55%, light yellow solid, m.p.: 44.1 – 46.9 °C. *n*-hexane/ethyl acetate = 3/1 as an eluent. <sup>1</sup>H NMR (400 MHz, CDCl<sub>3</sub>)  $\delta$  ppm 7.59 (d, *J* = 15.6 Hz, 1H), 7.56 – 7.50 (m, 2H), 7.48 – 7.40 (m, 3H), 6.81 (d, *J* = 15.5 Hz, 1H), 3.20 – 3.11 (m, 1H), 1.40 (d, *J* = 6.9 Hz, 6H); <sup>13</sup>C NMR (100 MHz, CDCl<sub>3</sub>)  $\delta$  ppm 145.7, 132.2, 131.2, 129.0, 128.4, 122.2, 54.6, 15.5.

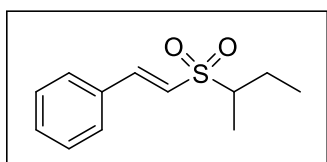

(*E*)-2-(*sec*-butylsulfonyl)vinylbenzene (**3ag**): 18.5 mg, 41%, colorless oil, *n*-hexane/ethyl acetate = 3/1 as an eluent. <sup>1</sup>H NMR (400 MHz, CDCl<sub>3</sub>)  $\delta$  ppm 7.63 – 7.49 (m, 3H), 7.48 – 7.38 (m, 3H), 6.79 (d, *J* = 15.5 Hz, 1H), 2.96 – 2.86 (m, 1H), 2.19 – 2.07 (m, 1H), 1.61 – 1.48 (m, 1H), 1.39 (d, *J* = 6.9 Hz, 3H), 1.05 (t, *J* = 7.5 Hz, 3H); <sup>13</sup>C NMR (100 MHz, CDCl<sub>3</sub>)  $\delta$  ppm 145.5, 132.3, 131.2, 129.0, 128.5, 122.6, 60.6, 22.5, 12.4, 11.2; HRMS (ESI) *m/z*: [M+Na]<sup>+</sup> calcd for C<sub>12</sub>H<sub>16</sub>NaO<sub>2</sub>S<sup>+</sup> 247.0763, found 247.0770.

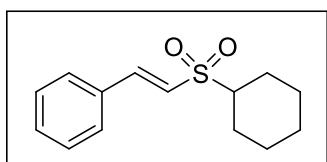

(*E*)-2-(cyclohexylsulfonyl)vinylbenzene (**3ah**)<sup>13</sup>: 22.5 mg, 45%, colorless oil, *n*-hexane/ethyl acetate = 3/1 as an eluent. <sup>1</sup>H NMR (400 MHz, CDCl<sub>3</sub>)  $\delta$  ppm 7.59 – 7.50 (m, 3H), 7.48 – 7.38 (m, 3H), 6.80 (d, *J* = 15.5 Hz, 1H), 2.88 (tt, *J* = 12.2, 3.5 Hz, 1H), 2.30 – 2.18 (m, 2H), 1.91 (dt, *J* = 13.1, 3.2 Hz, 2H), 1.71 (dt, *J* = 12.3, 3.1 Hz, 1H), 1.50

(qd,  $J = 12.5, 3.5$  Hz, 2H), 1.37 – 1.13 (m, 3H);  $^{13}\text{C}$  NMR (100 MHz,  $\text{CDCl}_3$ )  $\delta$  ppm 145.4, 132.2, 131.1, 129.0, 128.4, 122.7, 62.4, 25.3, 24.98, 24.96.

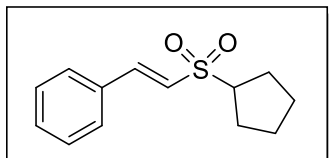

(*E*)-2-(cyclopentylsulfonyl)vinylbenzene (**3ai**): 23.8 mg, 50%, colorless oil, *n*-hexane/ethyl acetate = 3/1 as an eluent.  $^1\text{H}$  NMR (400 MHz,  $\text{CDCl}_3$ )  $\delta$  ppm 7.60 (d,  $J = 15.5$  Hz, 1H), 7.56 – 7.49 (m, 2H), 7.48 – 7.38 (m, 3H), 6.83 (d,  $J = 15.5$  Hz, 1H), 3.45 (tt,  $J = 9.0, 6.9$  Hz, 1H), 2.16 – 1.97 (m, 4H), 1.87 – 1.77 (m, 2H), 1.67 (m, 2H);  $^{13}\text{C}$  NMR (100 MHz,  $\text{CDCl}_3$ )  $\delta$  ppm 144.7, 132.3, 131.2, 129.1, 128.4, 123.8, 62.9, 27.0, 26.0; HRMS (ESI)  $m/z$ :  $[\text{M}+\text{Na}]^+$  calcd for  $\text{C}_{13}\text{H}_{16}\text{NaO}_2\text{S}^+$  259.0763, found 259.0771.

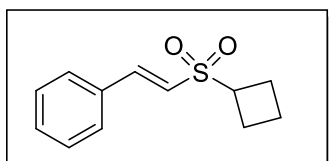

(*E*)-2-(cyclobutylsulfonyl)vinylbenzene (**3aj**)<sup>13</sup>: 24.7 mg, 56%, light yellow solid, m.p.: 76.8 – 79.7 °C. *n*-hexane/ethyl acetate = 3/1 as an eluent.  $^1\text{H}$  NMR (400 MHz,  $\text{CDCl}_3$ )  $\delta$  ppm 7.59 (d,  $J = 15.5$  Hz, 1H), 7.55 – 7.49 (m, 2H), 7.47 – 7.39 (m, 3H), 6.78 (d,  $J = 15.5$  Hz, 1H), 3.80 (quint,  $J = 8.2$  Hz, 1H), 2.64 – 2.50 (m, 2H), 2.37 – 2.26 (m, 2H), 2.12 – 2.00 (m, 2H);  $^{13}\text{C}$  NMR (100 MHz,  $\text{CDCl}_3$ )  $\delta$  ppm 145.0, 132.3, 131.2, 129.0, 128.4, 122.8, 55.6, 22.4, 17.0.

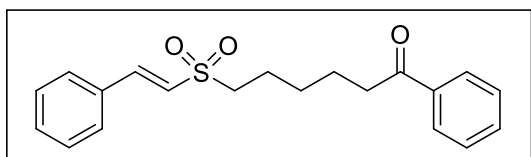

(*E*)-1-phenyl-6-(styrylsulfonyl)hexan-1-one (**3al**): 17.4 mg, 25%, white solid, m.p.: 58.7 – 60.1 °C. *n*-hexane/ethyl acetate = 3/1 – 2/1 as an eluent.  $^1\text{H}$  NMR (400 MHz,

CDCl<sub>3</sub>)  $\delta$  ppm 7.96 – 7.91 (m, 2H), 7.60 (d,  $J$  = 15.6 Hz, 1H), 7.57 – 7.51 (m, 3H), 7.45 (td,  $J$  = 7.5, 4.9 Hz, 5H), 6.84 (d,  $J$  = 15.5 Hz, 1H), 3.13 – 3.07 (m, 2H), 2.99 (t,  $J$  = 7.1 Hz, 2H), 1.94 – 1.84 (m, 2H), 1.83 – 1.73 (m, 2H), 1.59 – 1.48 (m, 2H); <sup>13</sup>C NMR (100 MHz, CDCl<sub>3</sub>)  $\delta$  ppm 199.7, 144.9, 136.7, 133.0, 132.1, 131.3, 129.1, 128.6, 128.5, 127.9, 124.5, 54.9, 37.9, 28.0, 23.4, 22.5; HRMS (ESI)  $m/z$ : [M+Na]<sup>+</sup> calcd for C<sub>20</sub>H<sub>22</sub>NaO<sub>3</sub>S<sup>+</sup> 365.1182, found 365.1188.

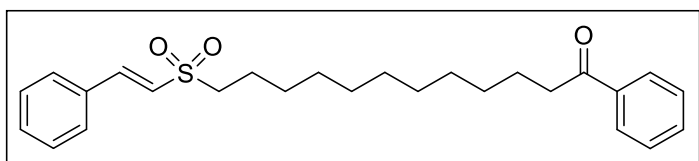

(*E*)-1-phenyl-12-(styrylsulfonyl)dodecan-1-one (**3am**): 22.8 mg, 27%, white solid, m.p.: 76.3 – 78.7 °C. *n*-hexane/ethyl acetate = 3/1 – 2/1 as an eluent. <sup>1</sup>H NMR (400 MHz, CDCl<sub>3</sub>)  $\delta$  ppm 7.99 – 7.93 (m, 2H), 7.63 – 7.55 (m, 2H), 7.54 – 7.50 (m, 2H), 7.49 – 7.40 (m, 5H), 6.83 (d,  $J$  = 15.5 Hz, 1H), 3.10 – 3.02 (m, 2H), 2.96 (t,  $J$  = 7.4 Hz, 2H), 1.87 – 1.77 (m, 2H), 1.76 – 1.68 (m, 2H), 1.48 – 1.22 (m, 14H); <sup>13</sup>C NMR (100 MHz, CDCl<sub>3</sub>)  $\delta$  ppm 200.6, 144.7, 137.0, 132.8, 132.2, 131.3, 129.1, 128.53, 128.51, 128.0, 124.6, 55.2, 38.6, 29.39, 29.37, 29.34, 29.29, 29.2, 29.0, 28.3, 24.3, 22.5; HRMS (ESI)  $m/z$ : [M+Na]<sup>+</sup> calcd for C<sub>26</sub>H<sub>34</sub>NaO<sub>3</sub>S<sup>+</sup> 449.2121, found 449.2115.

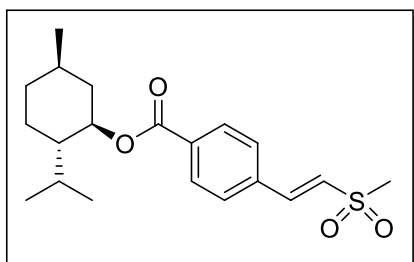

(1*R*,2*S*,5*R*)-2-isopropyl-5-methylcyclohexyl 4-((*E*)-2-(methylsulfonyl)vinyl)benzoate (**3n'a**): 40.8 mg, 56%, colorless oil, *n*-hexane/ethyl acetate = 3/1 -2/1 as an eluent. <sup>1</sup>H NMR (400 MHz, CDCl<sub>3</sub>)  $\delta$  ppm 8.09 (d,  $J$  = 8.1 Hz, 2H), 7.67 (d,  $J$  = 15.5 Hz, 1H), 7.59 (d,  $J$  = 8.2 Hz, 2H), 7.04 (d,  $J$  = 15.5 Hz, 1H), 4.95 (td,  $J$  = 10.9, 4.4 Hz, 1H), 3.07 (s, 3H), 2.17 – 2.09 (m, 1H), 2.01 – 1.88 (m, 1H), 1.79 – 1.70 (m, 2H), 1.64 – 1.50 (m, 2H), 1.20

– 1.05 (m, 2H), 0.93 (dd,  $J = 6.8, 4.4$  Hz, 7H), 0.80 (d,  $J = 7.0$  Hz, 3H);  $^{13}\text{C}$  NMR (100 MHz,  $\text{CDCl}_3$ )  $\delta$  ppm 165.1, 142.6, 135.9, 133.1, 130.2, 128.4, 128.2, 75.3, 47.1, 43.1, 40.8, 34.2, 31.4, 26.5, 23.5, 22.0, 20.7, 16.4; HRMS (ESI)  $m/z$ :  $[\text{M}+\text{Na}]^+$  calcd for  $\text{C}_{20}\text{H}_{28}\text{NaO}_4\text{S}^+$  387.1601, found 387.1598.

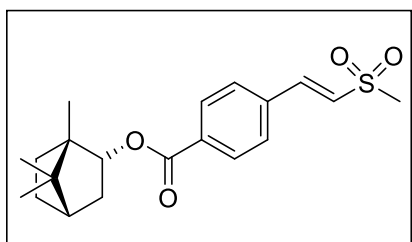

(1S,2R,4S)-1,7,7-trimethylbicyclo[2.2.1]heptan-2-yl 4-((E)-2-(methylsulfonyl)vinyl)benzoate (**3o'a**): 44.5 mg, 61%, white solid, m.p.: 100.8 – 103.2 °C. *n*-hexane/ethyl acetate = 3/1 -2/1 as an eluent.  $^1\text{H}$  NMR (400 MHz,  $\text{CDCl}_3$ )  $\delta$  ppm 8.11 (d,  $J = 8.2$  Hz, 2H), 7.68 (d,  $J = 15.5$  Hz, 1H), 7.61 (d,  $J = 8.1$  Hz, 2H), 7.04 (d,  $J = 15.4$  Hz, 1H), 5.17 – 5.09 (m, 1H), 3.08 (s, 3H), 2.54 – 2.44 (m, 1H), 2.17 – 2.07 (m, 1H), 1.88 – 1.72 (m, 2H), 1.50 – 1.38 (m, 1H), 1.37 – 1.27 (m, 1H), 1.13 (dd,  $J = 13.8, 3.5$  Hz, 1H), 0.97 (s, 3H), 0.92 (d,  $J = 1.9$  Hz, 6H);  $^{13}\text{C}$  NMR (100 MHz,  $\text{CDCl}_3$ )  $\delta$  ppm 165.8, 142.6, 135.9, 133.1, 130.1, 128.4, 128.3, 81.0, 49.0, 47.8, 44.8, 43.1, 36.8, 28.0, 27.3, 19.6, 18.8, 13.6; HRMS (ESI)  $m/z$ :  $[\text{M}+\text{Na}]^+$  calcd for  $\text{C}_{20}\text{H}_{26}\text{NaO}_4\text{S}^+$  385.1444, found 385.1446.

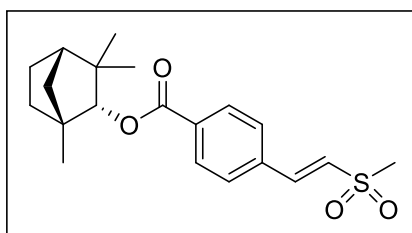

(1R,2R,4S)-1,3,3-trimethylbicyclo[2.2.1]heptan-2-yl 4-((E)-2-(methylsulfonyl)vinyl)benzoate (**3p'a**): 40.7 mg, 56%, colorless oil, *n*-hexane/ethyl acetate = 3/1 -2/1 as an eluent.  $^1\text{H}$  NMR (400 MHz,  $\text{CDCl}_3$ )  $\delta$  ppm 8.11 (d,  $J = 8.3$  Hz, 2H), 7.68 (d,  $J = 15.5$  Hz, 1H), 7.61 (d,  $J = 8.3$  Hz, 2H), 7.03 (d,  $J = 15.5$  Hz, 1H), 4.63 (d,  $J = 1.8$  Hz, 1H), 3.08 (s, 3H), 1.98 – 1.87 (m, 1H), 1.83 – 1.75 (m, 2H), 1.70 – 1.65 (m, 1H), 1.60 – 1.48 (m, 1H), 1.30 – 1.21 (m, 2H), 1.19 (s, 3H), 1.12 (s, 3H), 0.84 (s, 3H);  $^{13}\text{C}$  NMR (100 MHz,  $\text{CDCl}_3$ )



$\delta$  ppm 165.9, 142.6, 136.0, 132.9, 130.2, 128.4, 128.3, 87.2, 48.6, 48.3, 43.1, 41.4, 39.8, 29.7, 26.8, 25.8, 20.2, 19.4; HRMS (ESI)  $m/z$ :  $[M+Na]^+$  calcd for  $C_{20}H_{26}NaO_4S^+$  385.1444, found 385.1457.

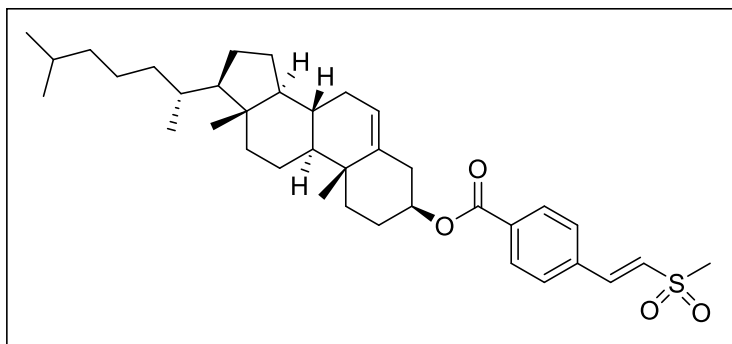

(3*S*,8*S*,9*S*,10*R*,13*R*,14*S*,17*R*)-10,13-dimethyl-17-((*R*)-6-methylheptan-2-yl)-2,3,4,7,8,9,10,11,12,13,14,15,16,17-tetradecahydro-1*H*-cyclopenta[*a*]phenanthren-3-yl 4-((*E*)-2-(methylsulfonyl)vinyl)benzoate (**3q'a**): 48.1 mg, 40%, white solid, m.p.: 184.5 – 186.5 °C. *n*-hexane/ethyl acetate = 3/1 -2/1 as an eluent.  $^1H$  NMR (400 MHz,  $CDCl_3$ )  $\delta$  ppm 8.09 (d,  $J$  = 8.1 Hz, 2H), 7.66 (d,  $J$  = 15.5 Hz, 1H), 7.58 (d,  $J$  = 8.2 Hz, 2H), 7.02 (d,  $J$  = 15.5 Hz, 1H), 5.43 (d,  $J$  = 3.9 Hz, 1H), 4.95 – 4.81 (m, 1H), 3.06 (s, 3H), 2.47 (d,  $J$  = 8.1 Hz, 2H), 2.08 – 1.90 (m, 4H), 1.64 – 1.44 (m, 6H), 1.43 – 0.96 (m, 19H), 0.92 (d,  $J$  = 6.5 Hz, 3H), 0.87 (dd,  $J$  = 6.6, 1.8 Hz, 6H), 0.69 (s, 3H);  $^{13}C$  NMR (100 MHz,  $CDCl_3$ )  $\delta$  ppm 165.0, 142.7, 139.4, 135.9, 133.1, 130.2, 128.3, 128.2, 122.9, 75.1, 56.6, 56.1, 50.0, 43.1, 42.3, 39.7, 39.5, 38.1, 36.9, 36.6, 36.1, 35.7, 31.9, 31.8, 28.2, 28.0, 27.8, 24.2, 23.8, 22.8, 22.5, 21.0, 19.3, 18.7, 11.8; HRMS (ESI)  $m/z$ :  $[M+Na]^+$  calcd for  $C_{37}H_{54}NaO_4S^+$  617.3635, found 617.3651.

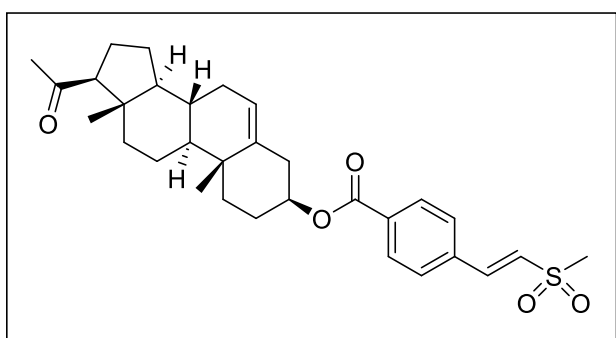

(3*S*,8*S*,9*S*,10*R*,13*S*,14*S*,17*S*)-17-acetyl-10,13-dimethyl-2,3,4,7,8,9,10,11,12,13,14,15,16,17-tetradecahydro-1*H*-cyclopenta[*a*]phenanthren-3-yl 4-((*E*)-2-(methylsulfonyl)vinyl)benzoate (**3r'a**): 58.1 mg, 55%, yellow solid, m.p.: 176.5 – 179.4 °C. *n*-hexane/ethyl acetate = 3/1 -2/1 as an eluent. <sup>1</sup>H NMR (400 MHz, CDCl<sub>3</sub>) δ ppm 8.09 (d, *J* = 8.1 Hz, 2H), 7.66 (d, *J* = 15.5 Hz, 1H), 7.59 (d, *J* = 8.1 Hz, 2H), 7.03 (d, *J* = 15.5 Hz, 1H), 5.43 (d, *J* = 3.0 Hz, 1H), 4.94 – 4.82 (m, 1H), 3.07 (s, 3H), 2.56 (t, *J* = 8.9 Hz, 1H), 2.48 (d, *J* = 7.8 Hz, 2H), 2.25 – 2.11 (m, 4H), 2.10 – 1.99 (m, 3H), 1.94 (dt, *J* = 13.4, 3.6 Hz, 1H), 1.82 – 1.42 (m, 9H), 1.31 – 1.15 (m, 3H), 1.08 (s, 3H), 0.65 (s, 3H); <sup>13</sup>C NMR (100 MHz, CDCl<sub>3</sub>) δ ppm 209.6, 165.0, 142.6, 139.4, 135.9, 133.0, 130.2, 128.34, 128.29, 122.6, 74.9, 63.6, 56.8, 49.8, 43.9, 43.1, 38.7, 38.0, 36.9, 36.6, 31.8, 31.7, 31.5, 27.7, 24.4, 22.8, 21.0, 19.3, 13.2; HRMS (ESI) *m/z*: [M+Na]<sup>+</sup> calcd for C<sub>31</sub>H<sub>40</sub>NaO<sub>5</sub>S<sup>+</sup> 547.2489, found 547.2493.

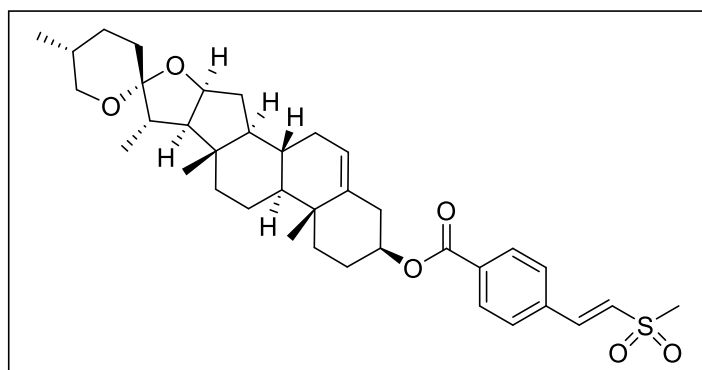

(4*S*,5'*R*,6*aR*,6*bS*,8*aS*,8*bR*,9*S*,10*R*,11*aS*,12*aS*,12*bS*)-5',6*a*,8*a*,9-tetramethyl-1,3,3',4,4',5,5',6,6*a*,6*b*,6',7,8,8*a*,8*b*,9,11*a*,12,12*a*,12*b*-icosahydrospiro[naphtho[2',1':4,5]indeno[2,1-*b*]furan-10,2'-pyran]-4-yl 4-((*E*)-2-(methylsulfonyl)vinyl)benzoate (**3s'a**): 32.4 mg, 26%, light yellow solid, m.p.: 237.1 – 240.0 °C. *n*-hexane/ethyl acetate = 3/1 -2/1 as an eluent. <sup>1</sup>H NMR (400 MHz, CDCl<sub>3</sub>) δ ppm 8.09 (d, *J* = 8.1 Hz, 2H), 7.66 (d, *J* = 15.5 Hz, 1H), 7.58 (d, *J* = 8.1 Hz, 2H), 7.02 (d, *J* = 15.5 Hz, 1H), 5.43 (d, *J* = 4.1 Hz, 1H), 4.92 – 4.82 (m, 1H), 4.42 (q, *J* = 7.4 Hz, 1H), 3.48 (dd, *J* = 10.4, 3.1 Hz, 1H), 3.38 (t, *J* = 10.9 Hz, 1H), 3.07 (s, 3H), 2.48 (d, *J* = 8.1 Hz, 2H), 2.08 – 1.41 (m, 18H), 1.35 – 1.12 (m, 4H), 1.09 (s, 3H), 0.98 (d, *J* = 6.9 Hz, 3H), 0.79 (d, *J* = 7.0 Hz, 6H); <sup>13</sup>C NMR (100 MHz, CDCl<sub>3</sub>) δ ppm 165.0, 142.7, 139.4, 135.9, 133.1, 130.2, 128.35, 128.26, 122.6, 109.2, 80.7,

75.0, 66.8, 62.0, 56.4, 49.9, 43.1, 41.6, 40.2, 39.7, 38.1, 36.9, 36.7, 32.0, 31.8, 31.4, 31.3, 30.2, 28.7, 27.8, 20.8, 19.3, 17.1, 16.3, 14.5; HRMS (ESI)  $m/z$ :  $[M+Na]^+$  calcd for  $C_{37}H_{50}NaO_6S^+$  645.3220, found 645.3228.

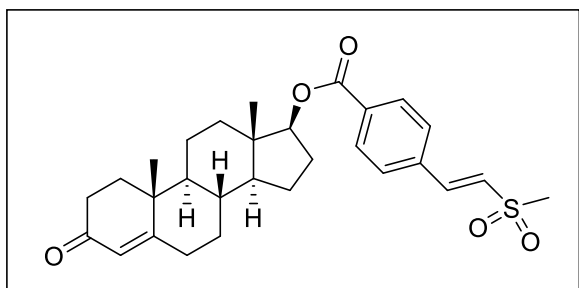

(8*R*,9*S*,10*R*,13*S*,14*S*,17*S*)-10,13-dimethyl-3-oxo-2,3,6,7,8,9,10,11,12,13,14,15,16,17-tetradecahydro-1*H*-cyclopenta[*a*]phenanthren-17-yl 4-((*E*)-2-(methylsulfonyl)vinyl)benzoate (**3t'a**): 37.5 mg, 38%, white solid, m.p.: 189.3 – 191.7 °C. *n*-hexane/ethyl acetate = 3/1 -2/1 as an eluent.  $^1H$  NMR (400 MHz,  $CDCl_3$ )  $\delta$  ppm 8.09 (d,  $J$  = 8.1 Hz, 2H), 7.67 (d,  $J$  = 15.5 Hz, 1H), 7.60 (d,  $J$  = 8.1 Hz, 2H), 7.03 (d,  $J$  = 15.5 Hz, 1H), 5.75 (d,  $J$  = 1.6 Hz, 1H), 4.87 (t,  $J$  = 8.4 Hz, 1H), 3.07 (s, 3H), 2.50 – 2.26 (m, 5H), 2.09 – 1.99 (m, 1H), 1.94 – 1.84 (m, 2H), 1.81 – 1.57 (m, 6H), 1.51 – 1.38 (m, 2H), 1.33 – 1.14 (m, 6H), 0.99 (s, 3H);  $^{13}C$  NMR (100 MHz,  $CDCl_3$ )  $\delta$  ppm 199.5, 170.9, 165.5, 142.6, 136.0, 132.9, 130.2, 128.4, 128.3, 123.9, 83.4, 53.6, 50.2, 43.1, 42.9, 38.6, 36.7, 35.6, 35.4, 33.9, 32.9, 31.4, 27.6, 23.6, 20.5, 17.4, 12.3; HRMS (ESI)  $m/z$ :  $[M+Na]^+$  calcd for  $C_{29}H_{36}NaO_5S^+$  519.2176, found 519.2178.

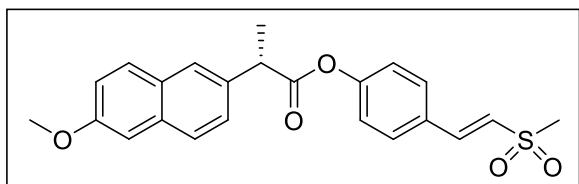

(*E*)-4-(2-(methylsulfonyl)vinyl)phenyl (*S*)-2-(6-methoxynaphthalen-2-yl)propanoate (**3u'a**): 36.4 mg, 44%, white solid, m.p.: 160.8 – 164.1 °C. *n*-hexane/ethyl acetate = 2/1 as an eluent.  $^1H$  NMR (400 MHz,  $CDCl_3$ )  $\delta$  ppm 7.79 – 7.71 (m, 3H), 7.57 (d,  $J$  = 15.5 Hz, 1H), 7.51 – 7.44 (m, 3H), 7.20 – 7.13 (m, 2H), 7.06 (d,  $J$  = 8.6 Hz, 2H), 6.84 (d,  $J$  = 15.4 Hz, 1H), 4.10 (q,  $J$  = 7.1 Hz, 1H), 3.92 (s, 3H), 3.01 (s, 3H), 1.69 (d,  $J$  = 7.1 Hz,

3H);  $^{13}\text{C}$  NMR (100 MHz,  $\text{CDCl}_3$ )  $\delta$  ppm 172.7, 157.8, 153.1, 142.9, 134.7, 133.8, 129.7, 129.6, 129.3, 128.9, 127.4, 126.14, 126.09, 125.9, 122.3, 119.2, 105.5, 55.3, 45.5, 43.2, 18.4; HRMS (ESI)  $m/z$ :  $[\text{M}+\text{Na}]^+$  calcd for  $\text{C}_{23}\text{H}_{22}\text{NaO}_5\text{S}^+$  433.1080, found 433.1092.

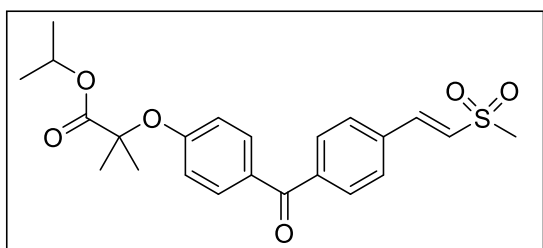

isopropyl (*E*)-2-methyl-2-(4-(4-(2-(methylsulfonyl)vinyl)benzoyl)phenoxy)propanoate (**3v'a**): 40.2 mg, 47%, white solid, m.p.: 109.6 – 112.1 °C. *n*-hexane/ethyl acetate = 2/1 as an eluent.  $^1\text{H}$  NMR (400 MHz,  $\text{CDCl}_3$ )  $\delta$  ppm 7.82 – 7.73 (m, 4H), 7.69 (d,  $J$  = 15.5 Hz, 1H), 7.63 (d,  $J$  = 8.2 Hz, 2H), 7.06 (d,  $J$  = 15.5 Hz, 1H), 6.88 (d,  $J$  = 8.9 Hz, 2H), 5.16 – 5.04 (m, 1H), 3.08 (s, 3H), 1.67 (s, 6H), 1.21 (d,  $J$  = 6.3 Hz, 6H);  $^{13}\text{C}$  NMR (100 MHz,  $\text{CDCl}_3$ )  $\delta$  ppm 194.3, 172.9, 159.8, 142.6, 140.3, 135.1, 131.9, 130.3, 129.8, 128.3, 128.1, 117.1, 79.3, 69.3, 43.1, 25.3, 21.4; HRMS (ESI)  $m/z$ :  $[\text{M}+\text{Na}]^+$  calcd for  $\text{C}_{23}\text{H}_{26}\text{NaO}_6\text{S}^+$  453.1342, found 453.1335.

**<sup>1</sup>H, <sup>19</sup>F and <sup>13</sup>C NMR spectra of products**

**(E)-(2-(methylsulfonyl)vinyl)benzene (3aa)**

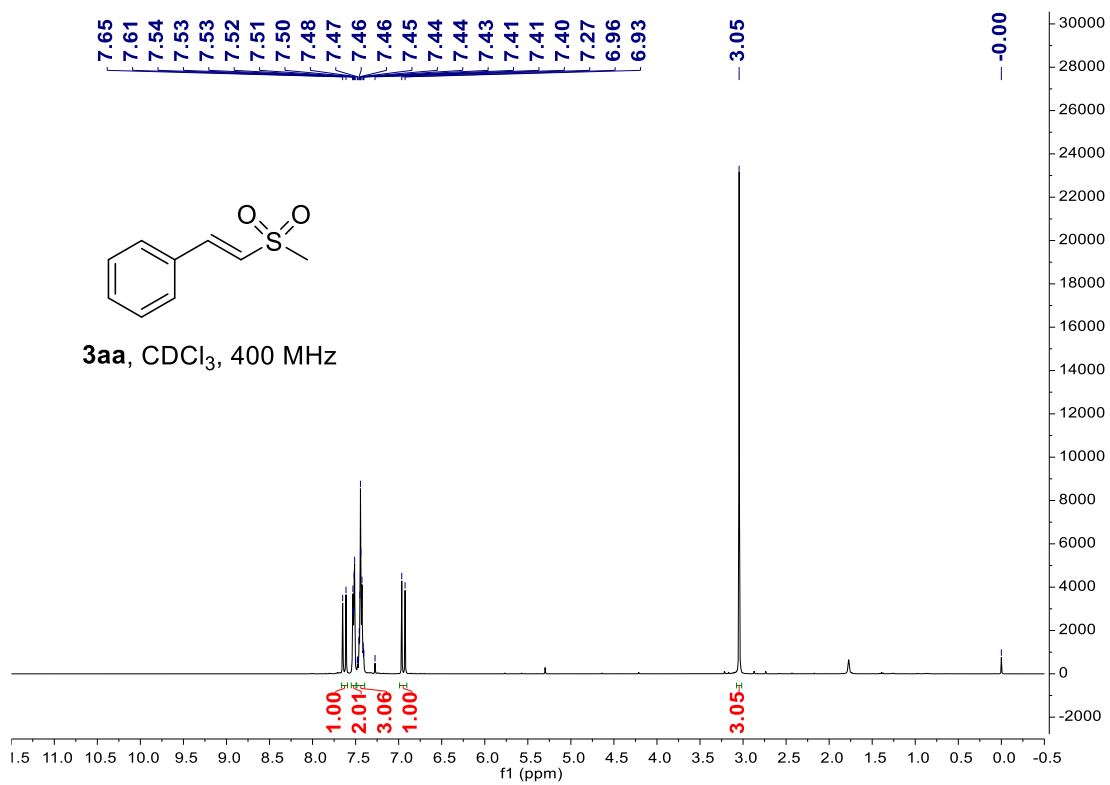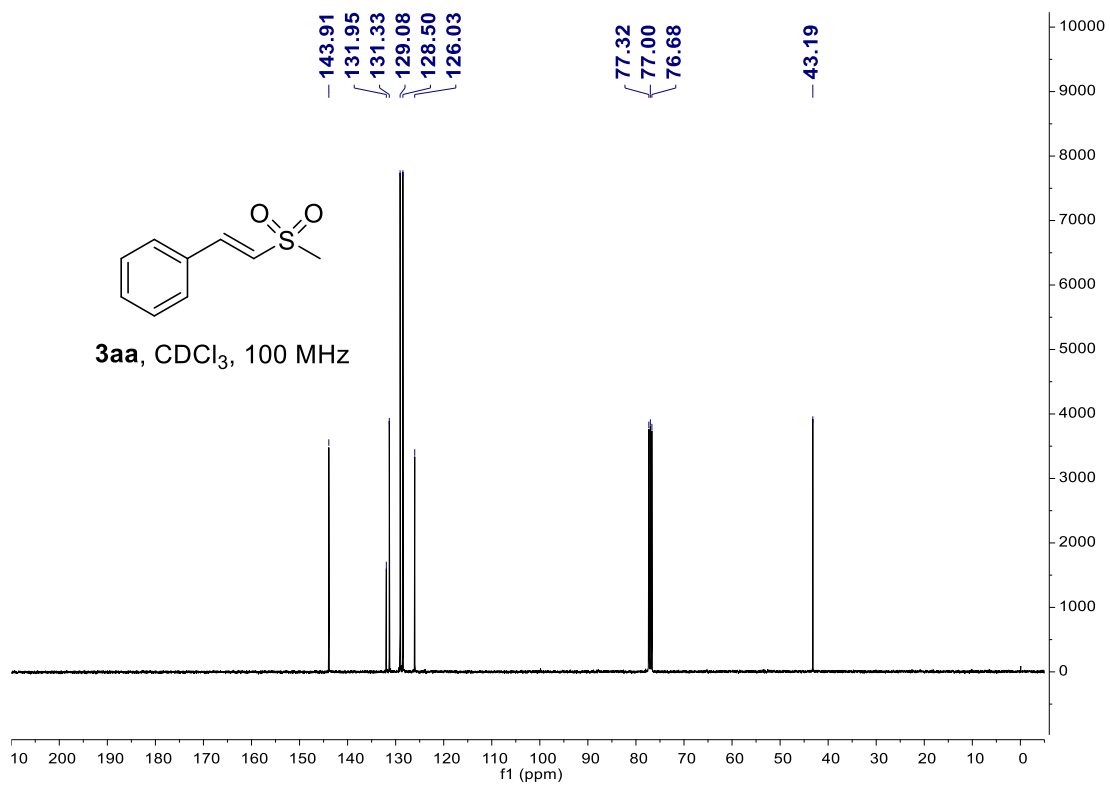

(E)-1-methyl-2-(2-(methylsulfonyl)vinyl)benzene (**3ba**)

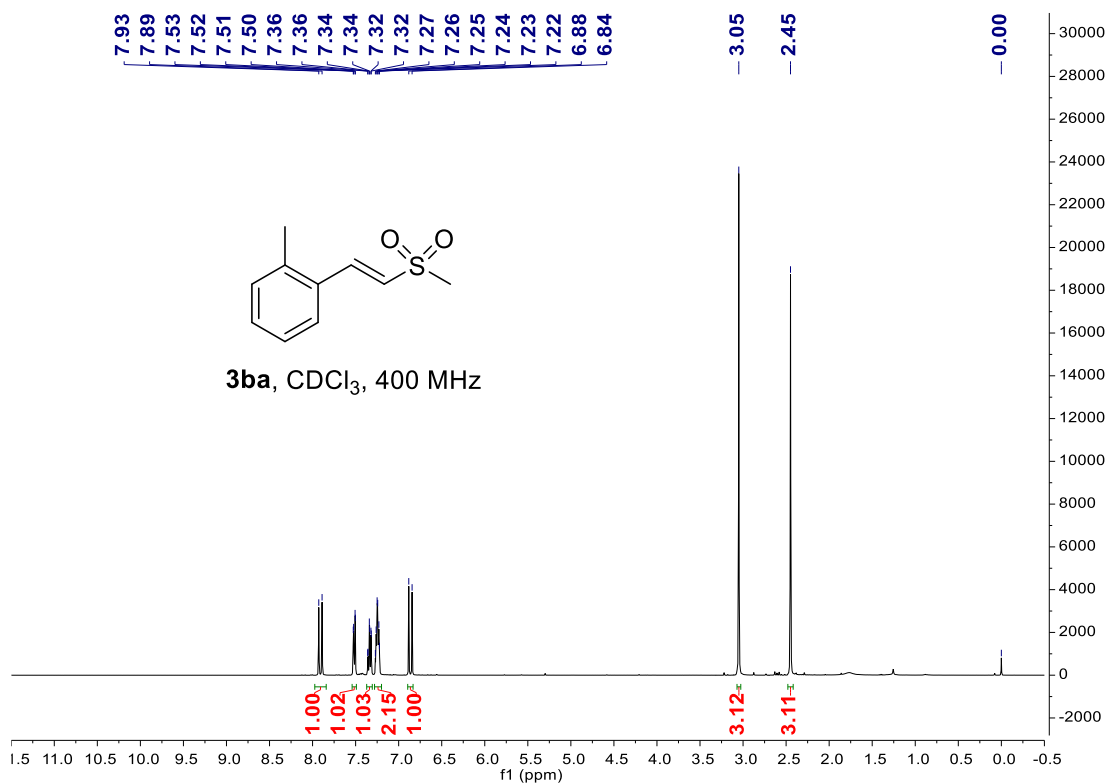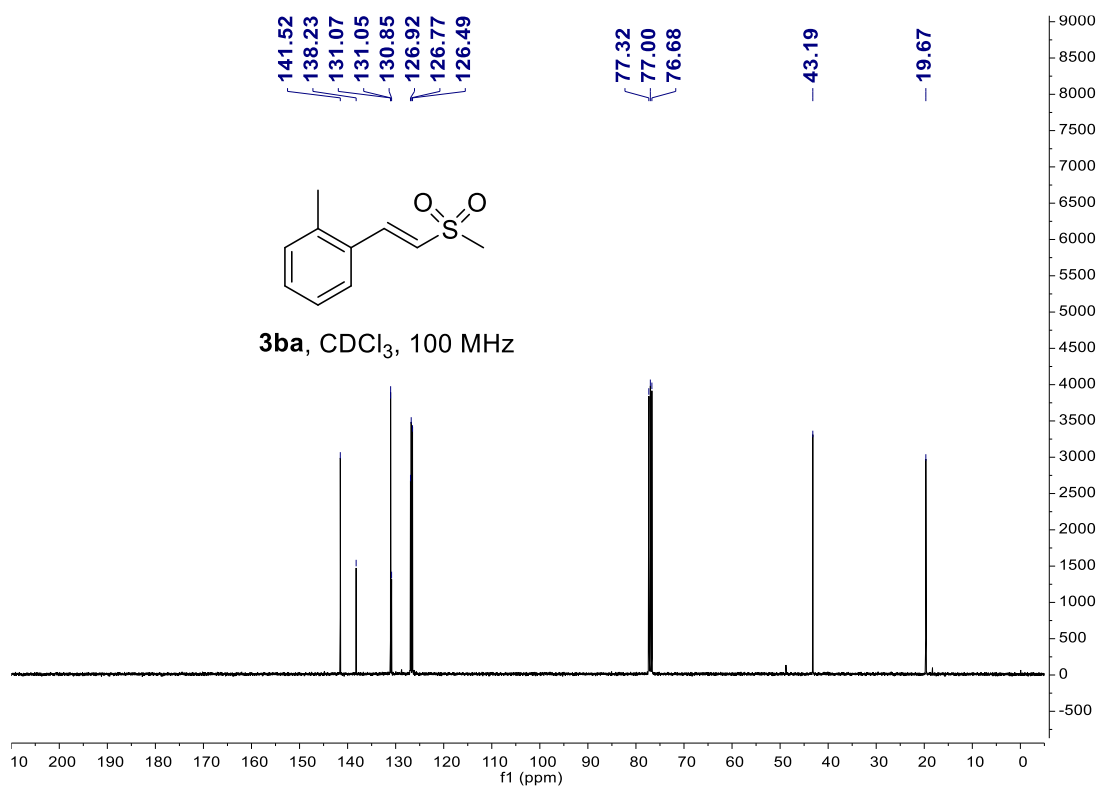

(E)-1-methyl-3-(2-(methylsulfonyl)vinyl)benzene (**3ca**)

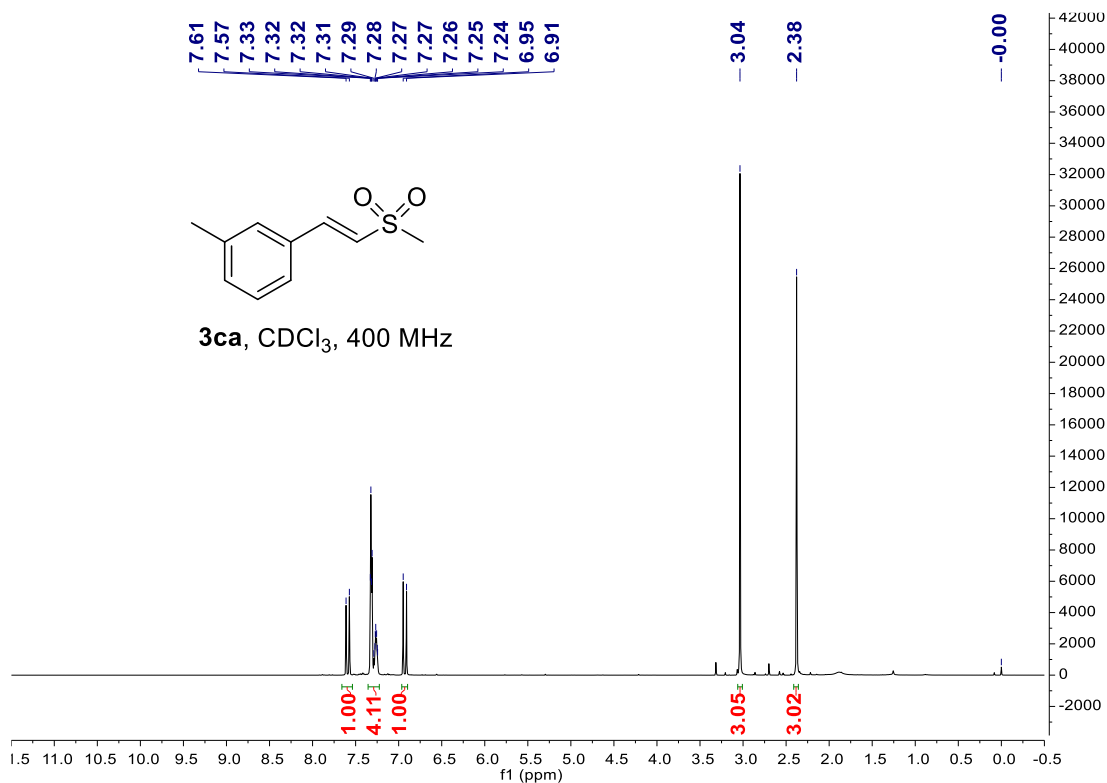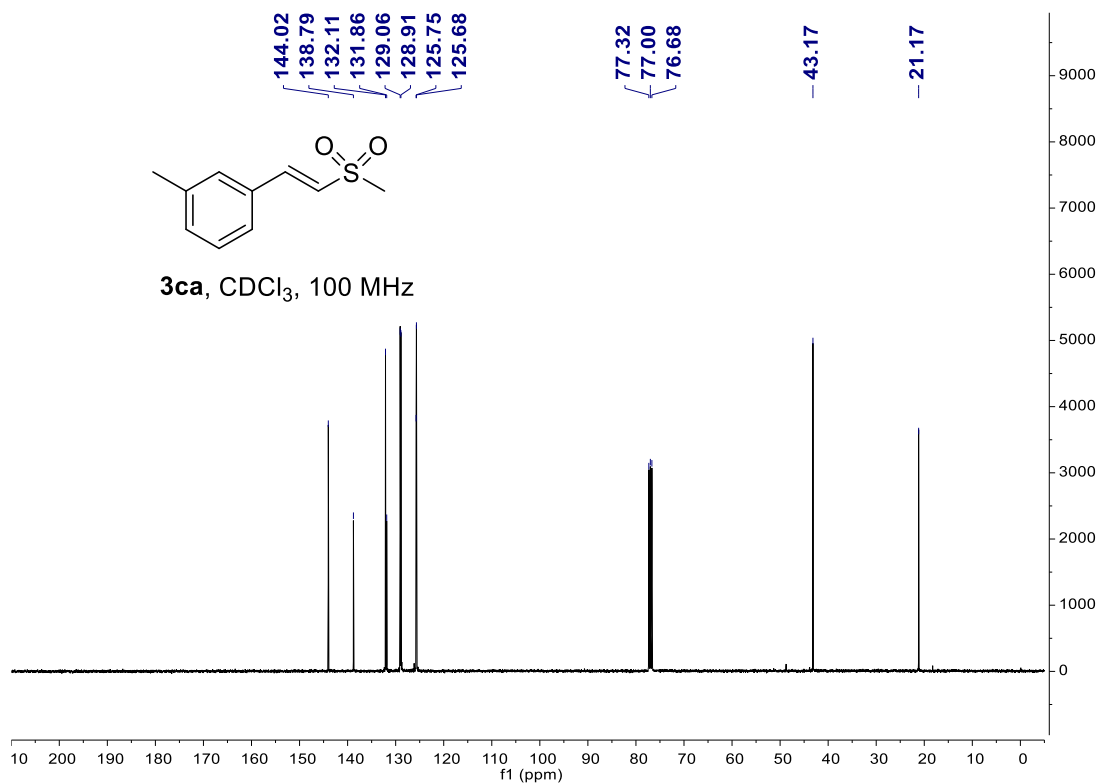

(E)-1-methyl-4-(2-(methylsulfonyl)vinyl)benzene (**3da**)

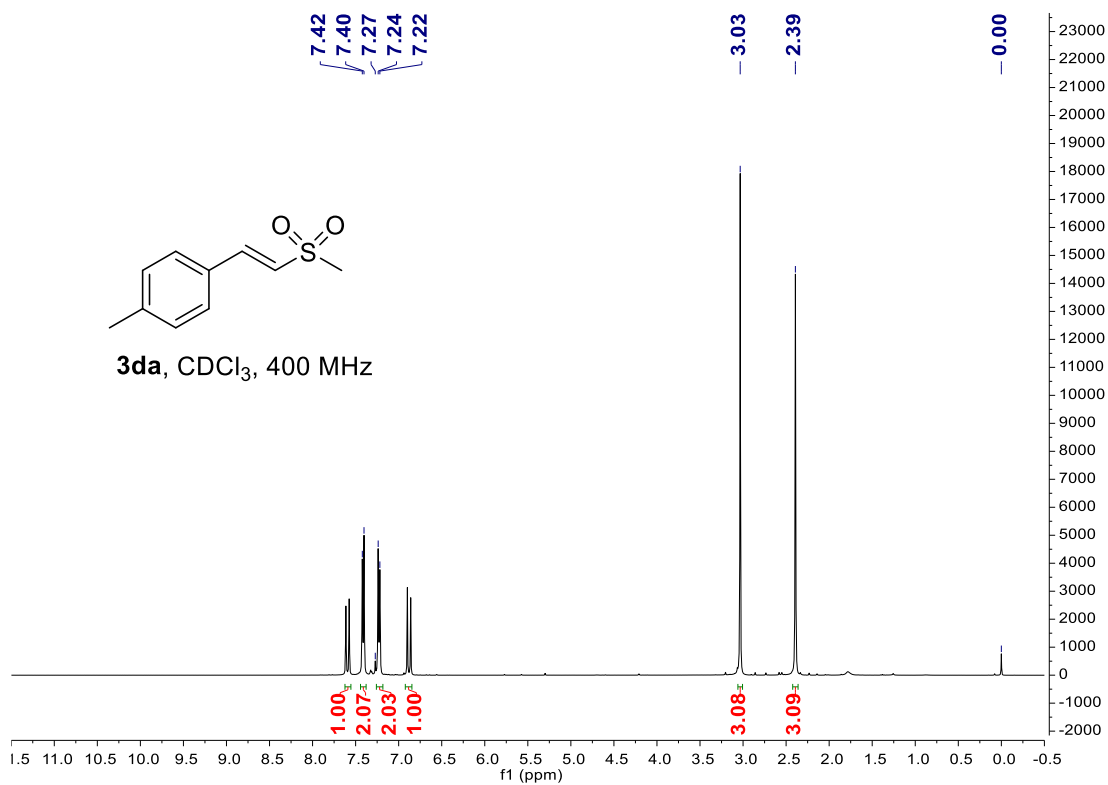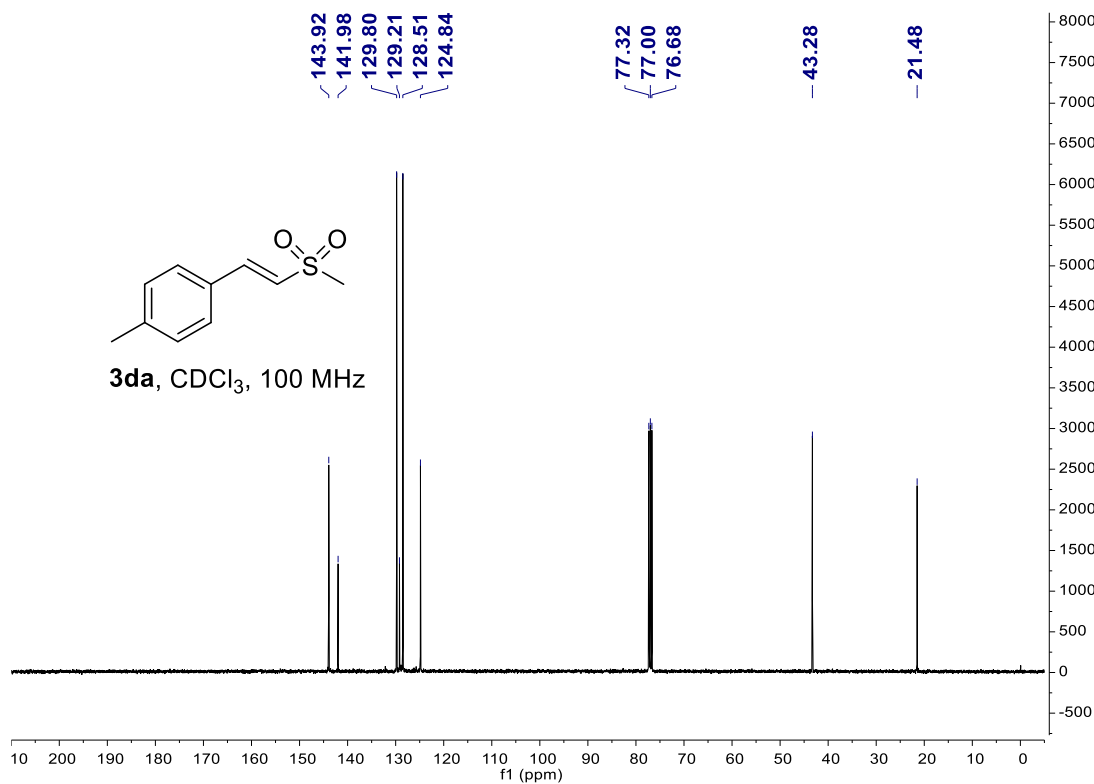



(E)-1-(tert-butyl)-4-(2-(methylsulfonyl)vinyl)benzene (**3ea**)

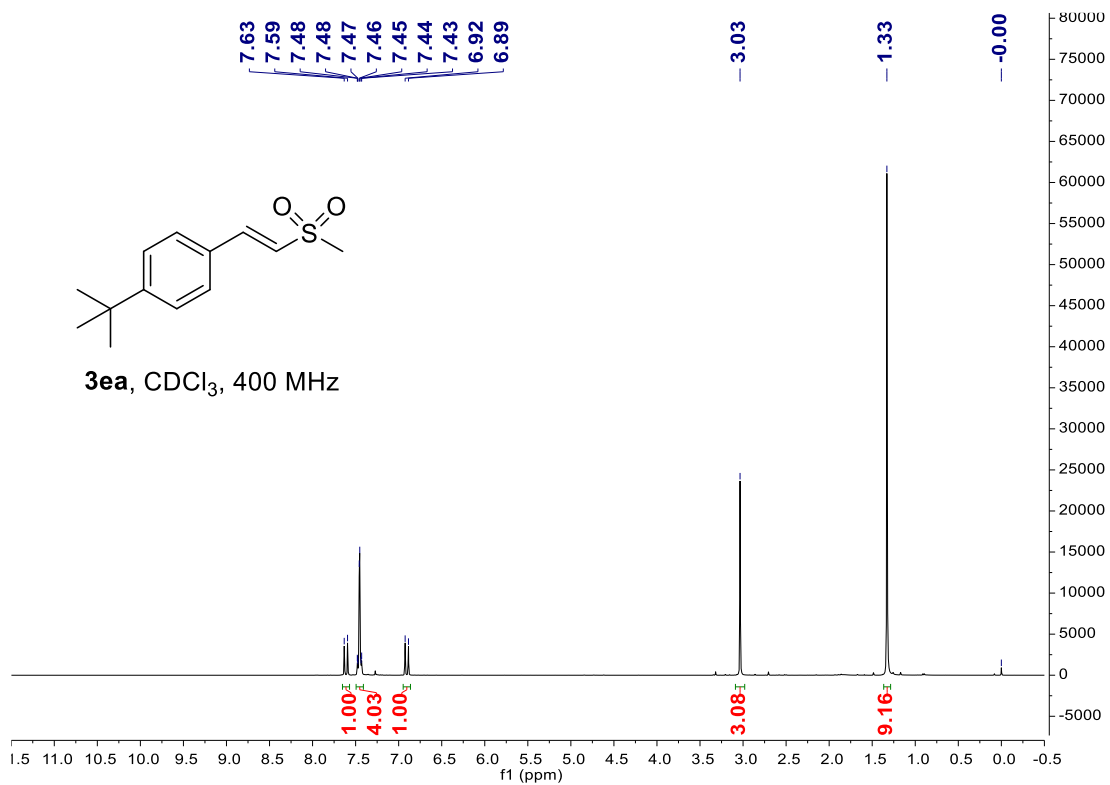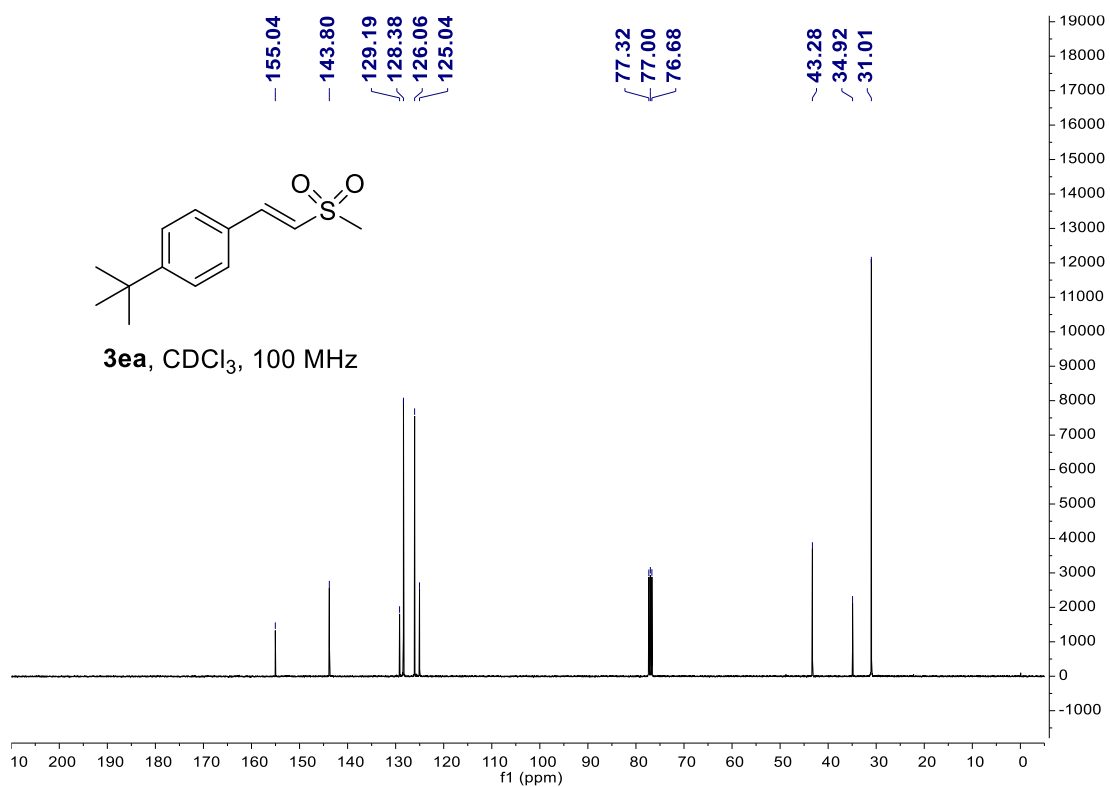

(E)-trimethyl(4-(2-(methylsulfonyl)vinyl)phenyl)silane (**3fa**)

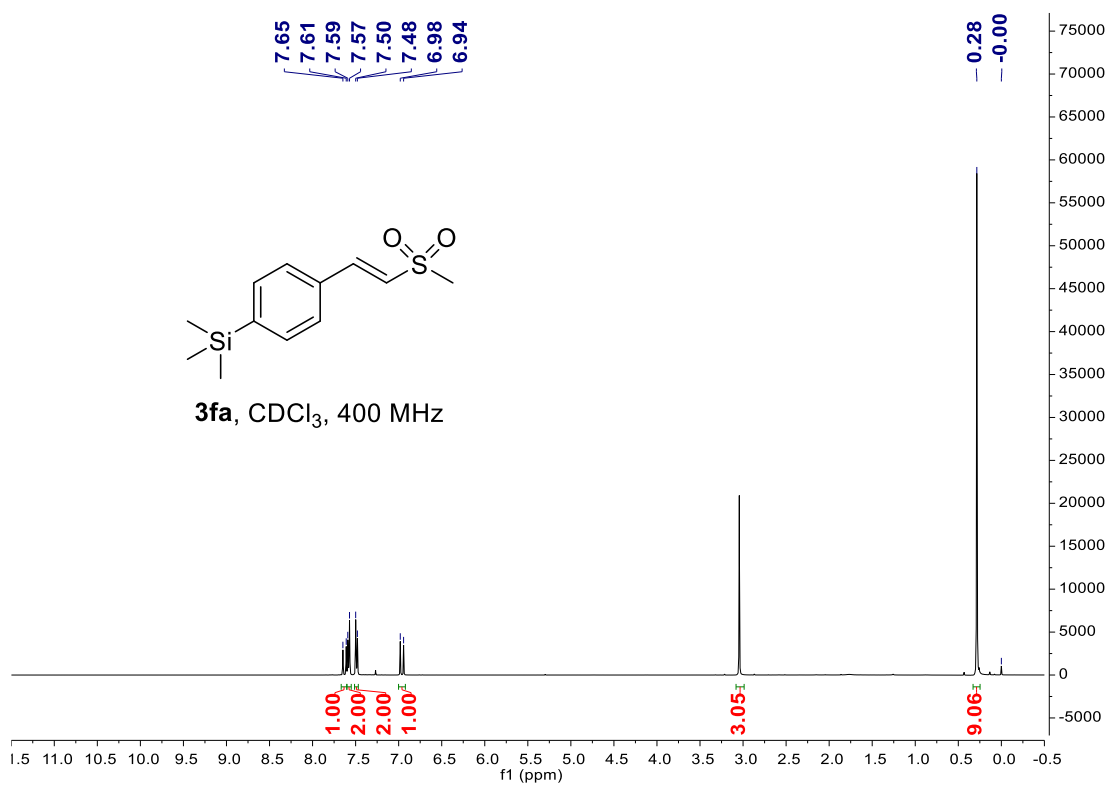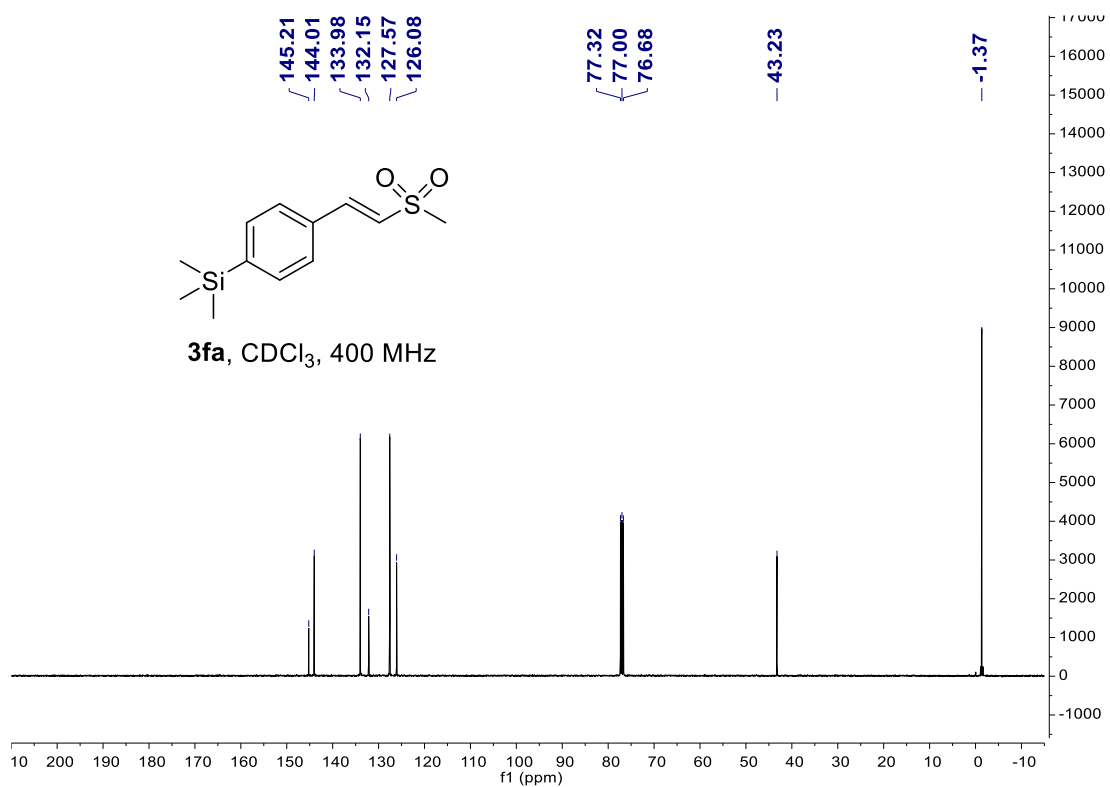

(E)-4-(2-(methylsulfonyl)vinyl)-1,1'-biphenyl (**3ga**)

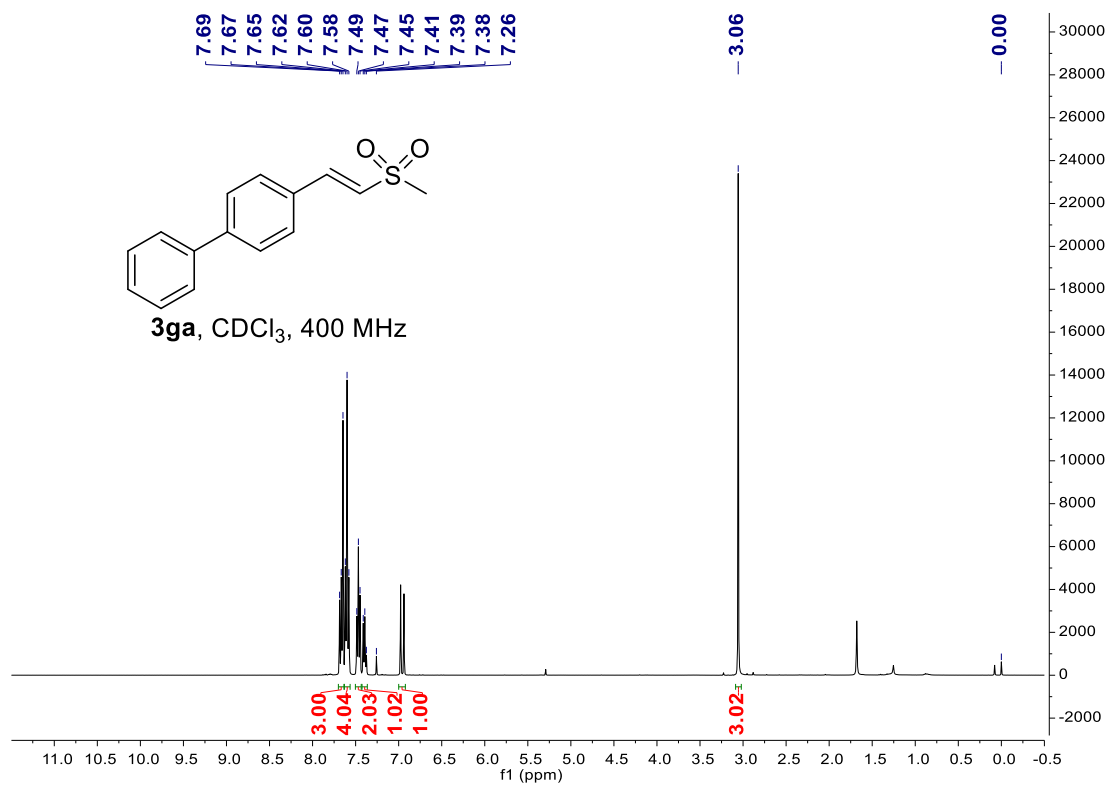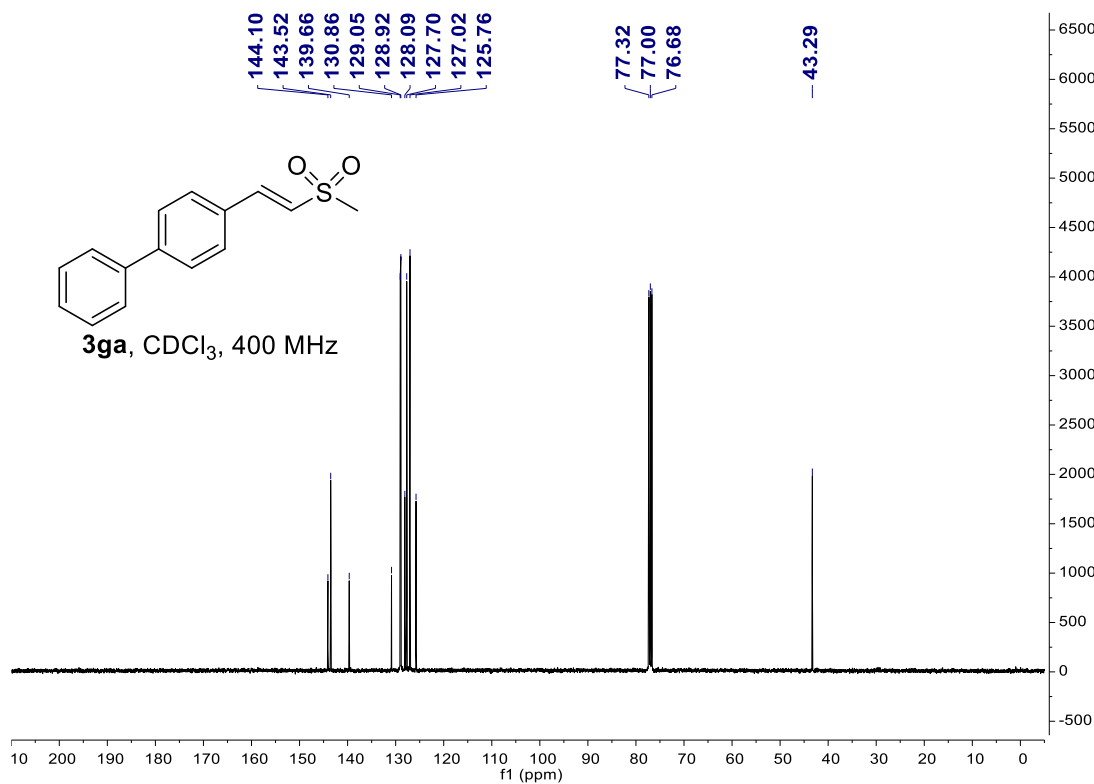

(E)-4-(2-(methylsulfonyl)vinyl)phenyl acetate (**3ha**)

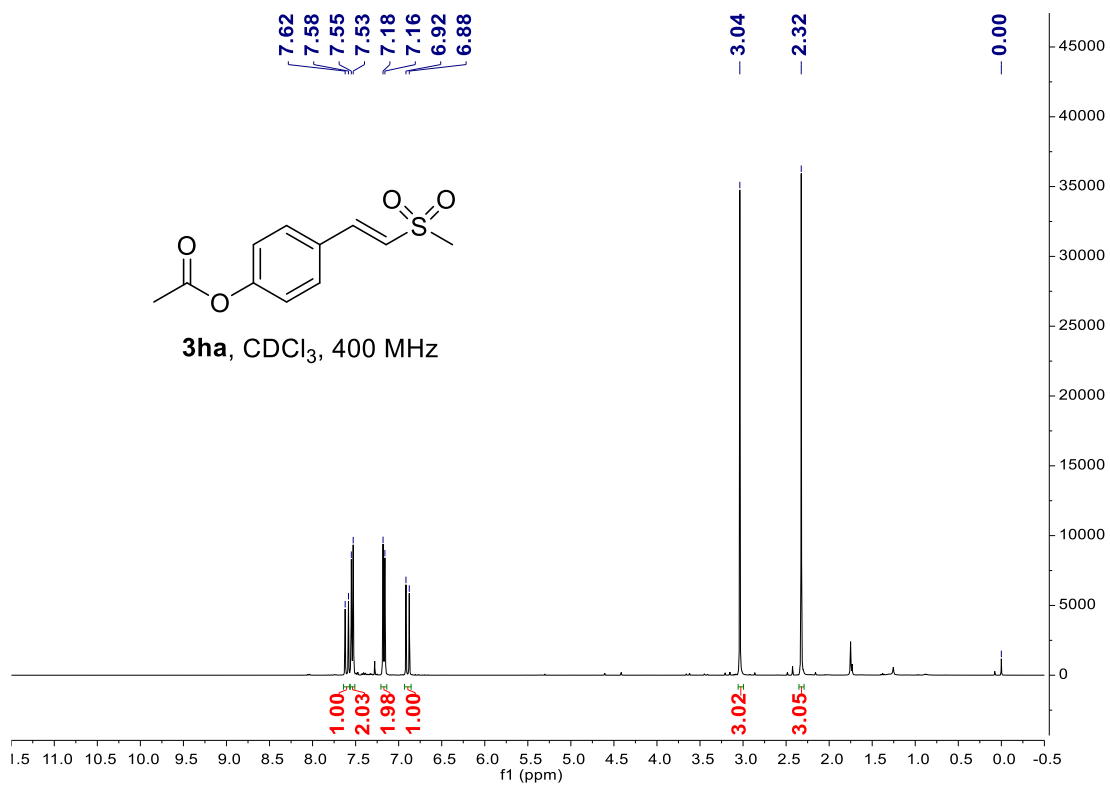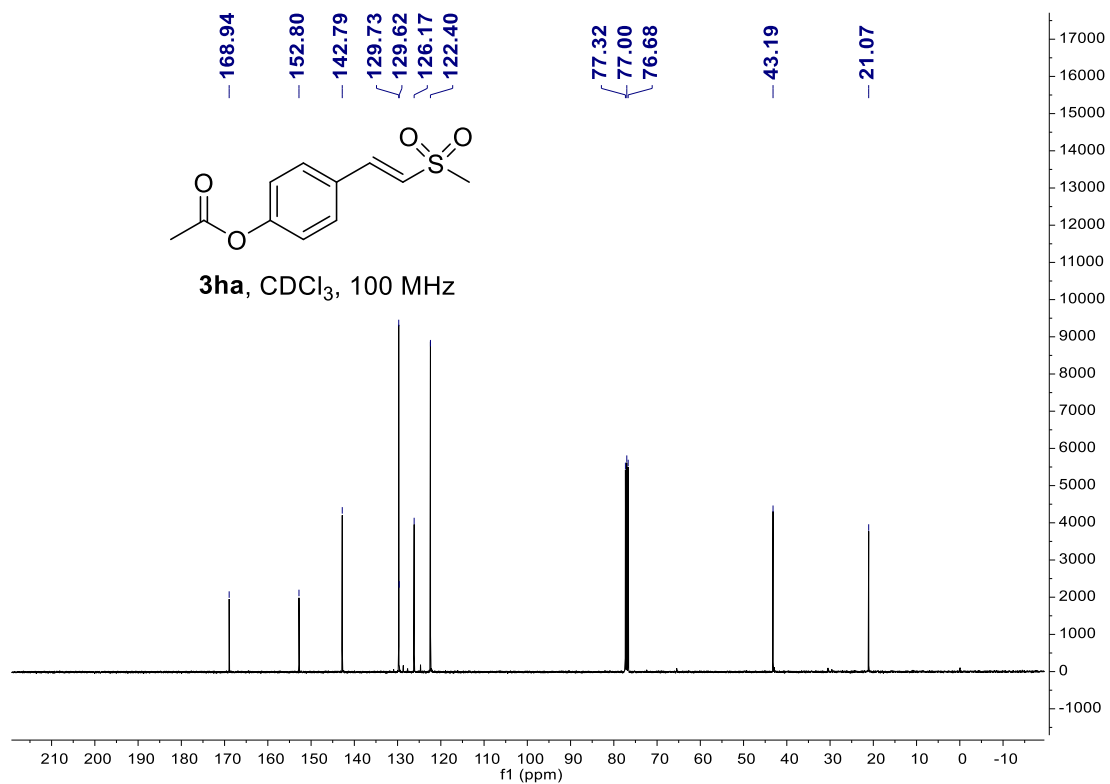

(E)-1-methoxy-4-(2-(methylsulfonyl)vinyl)benzene (**3ia**)

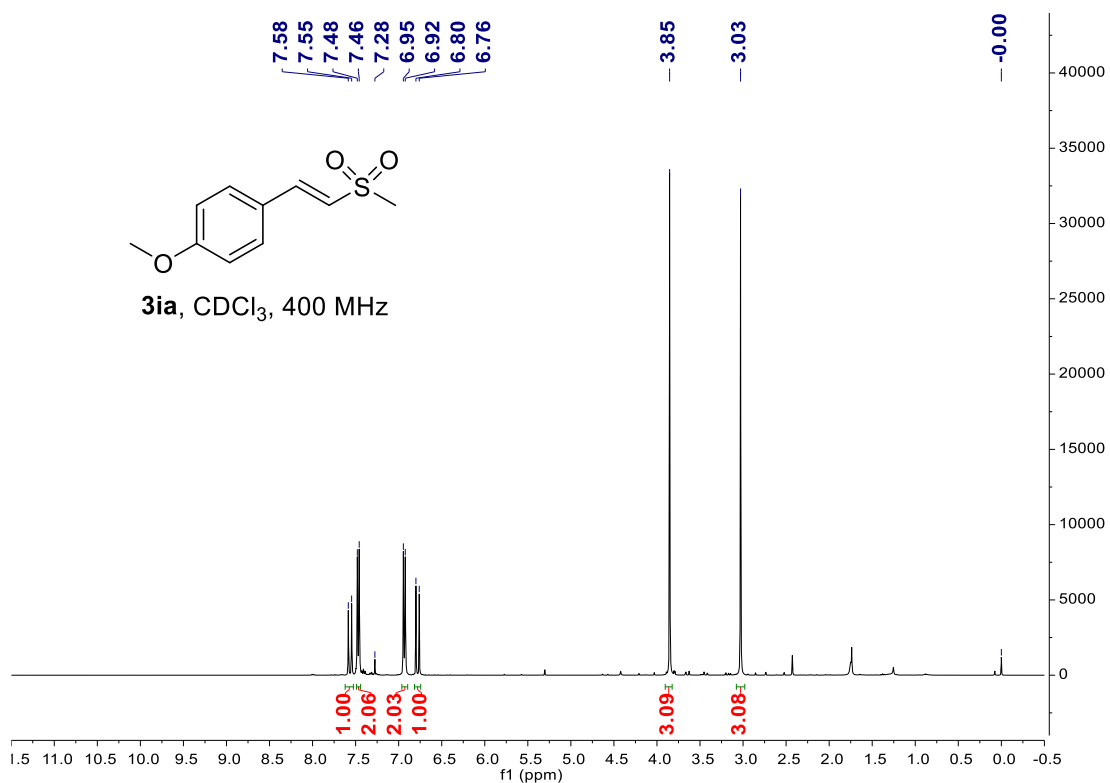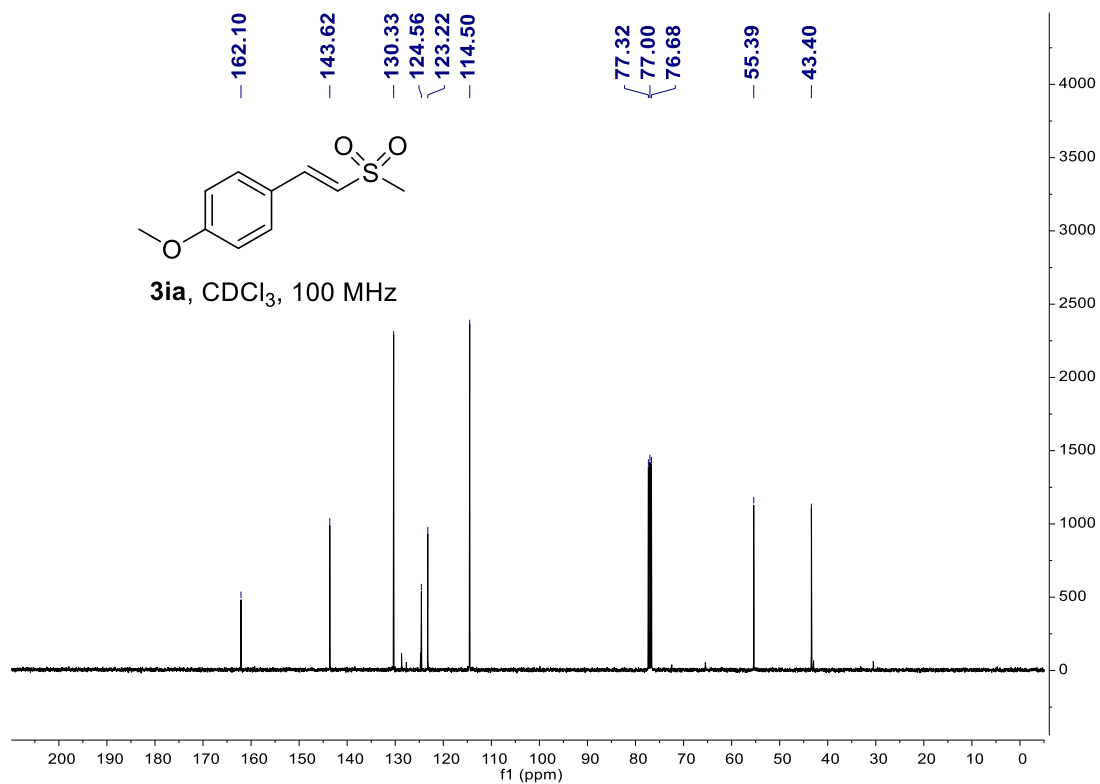

(E)-1-(2-(methylsulfonyl)vinyl)-4-phenoxybenzene (**3ja**)

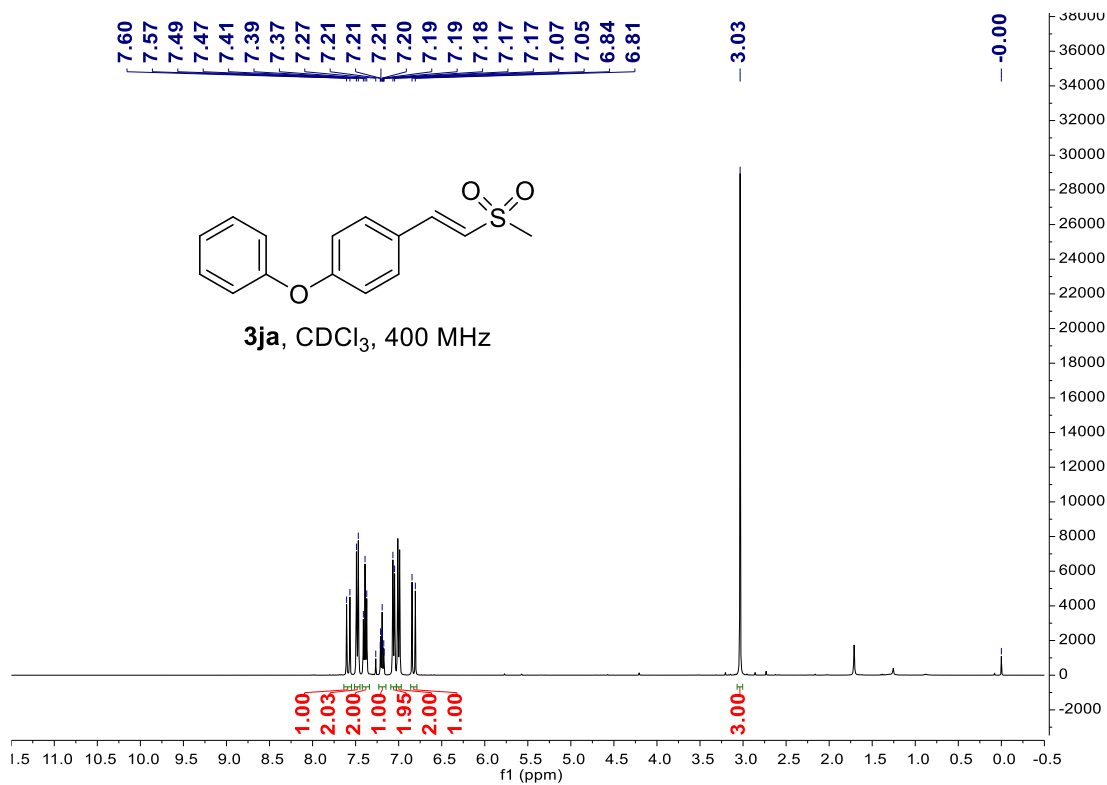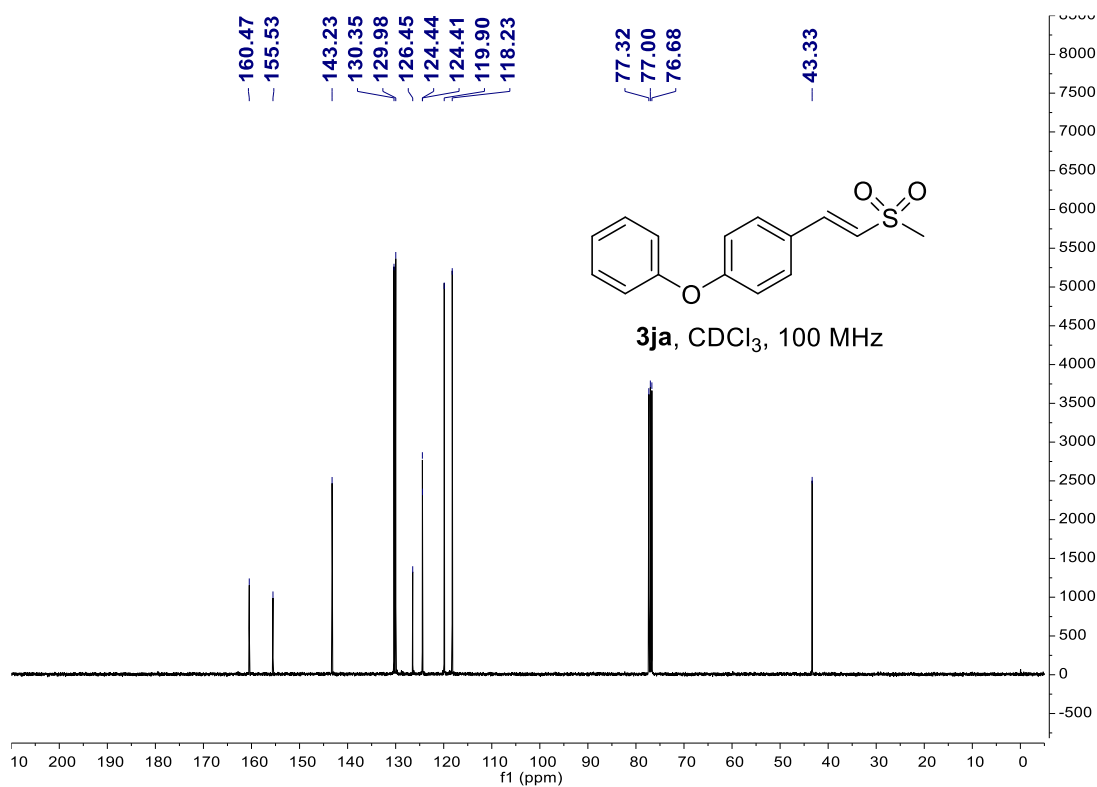

(E)-4-methyl-N-(2-(2-(methylsulfonyl)vinyl)phenyl)benzenesulfonamide (**3ka**)

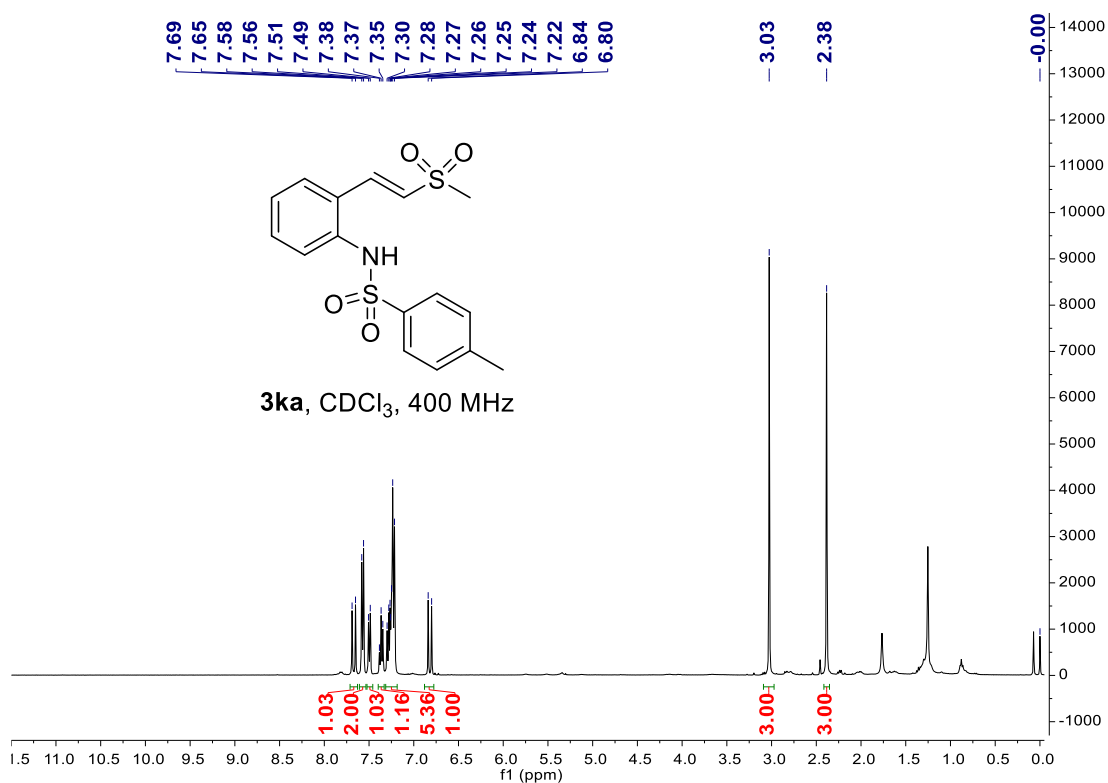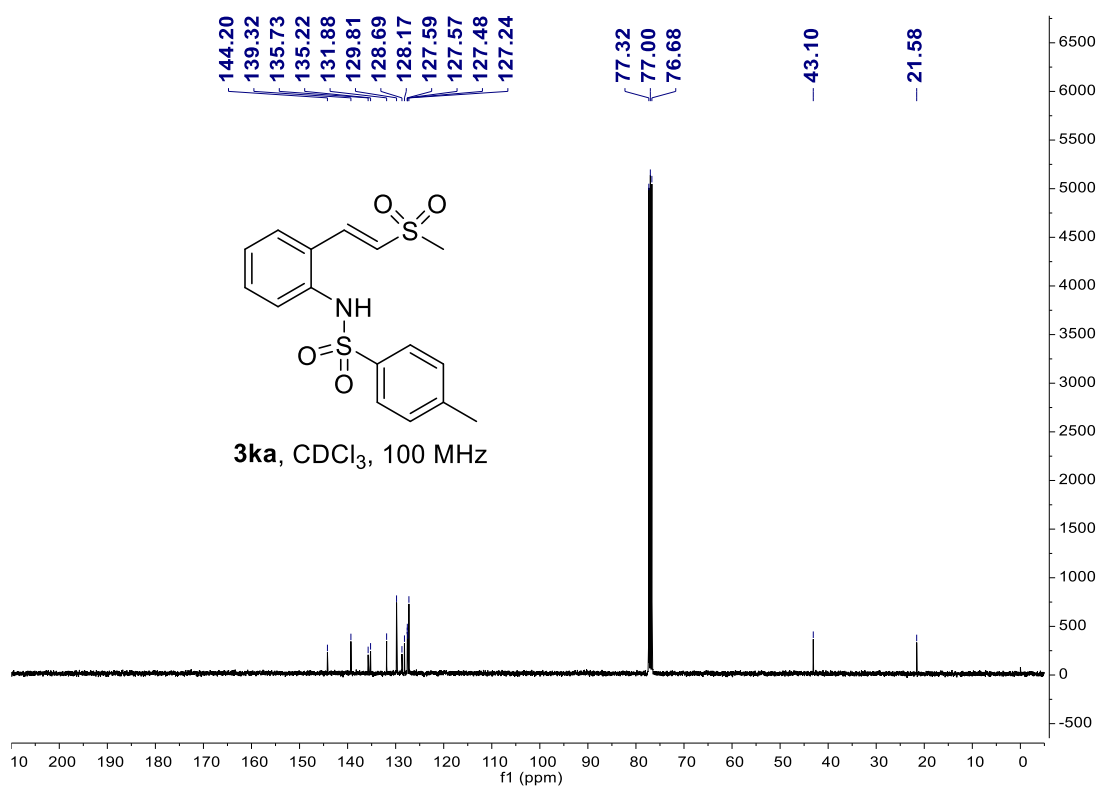

(E)-1-(2-(methylsulfonyl)vinyl)-4-(trifluoromethyl)benzene (**3la**)

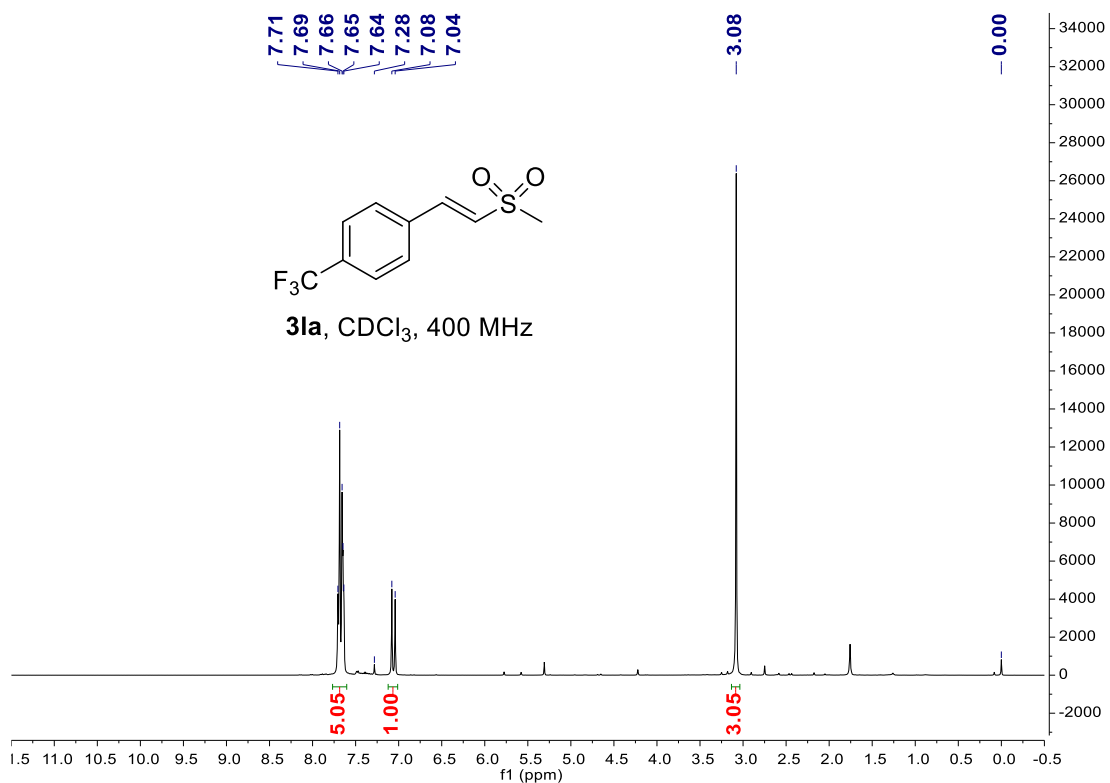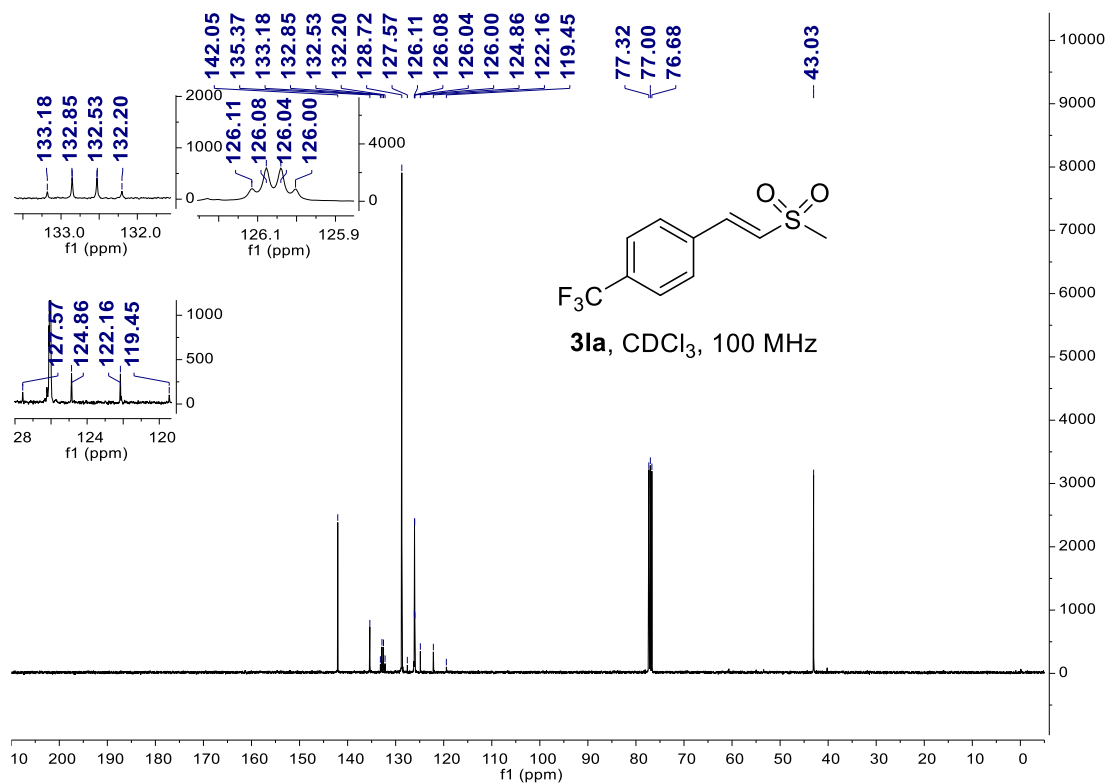



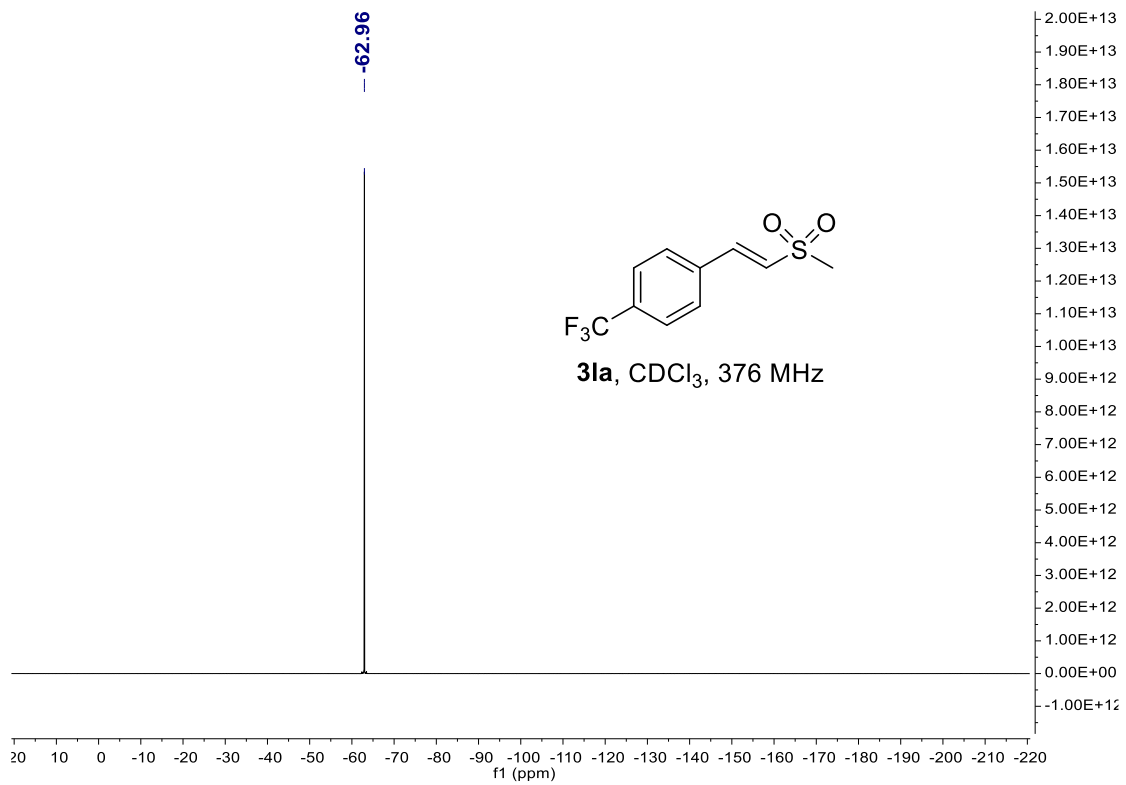

**(E)-4-(2-(methylsulfonyl)vinyl)benzonitrile (3ma)**

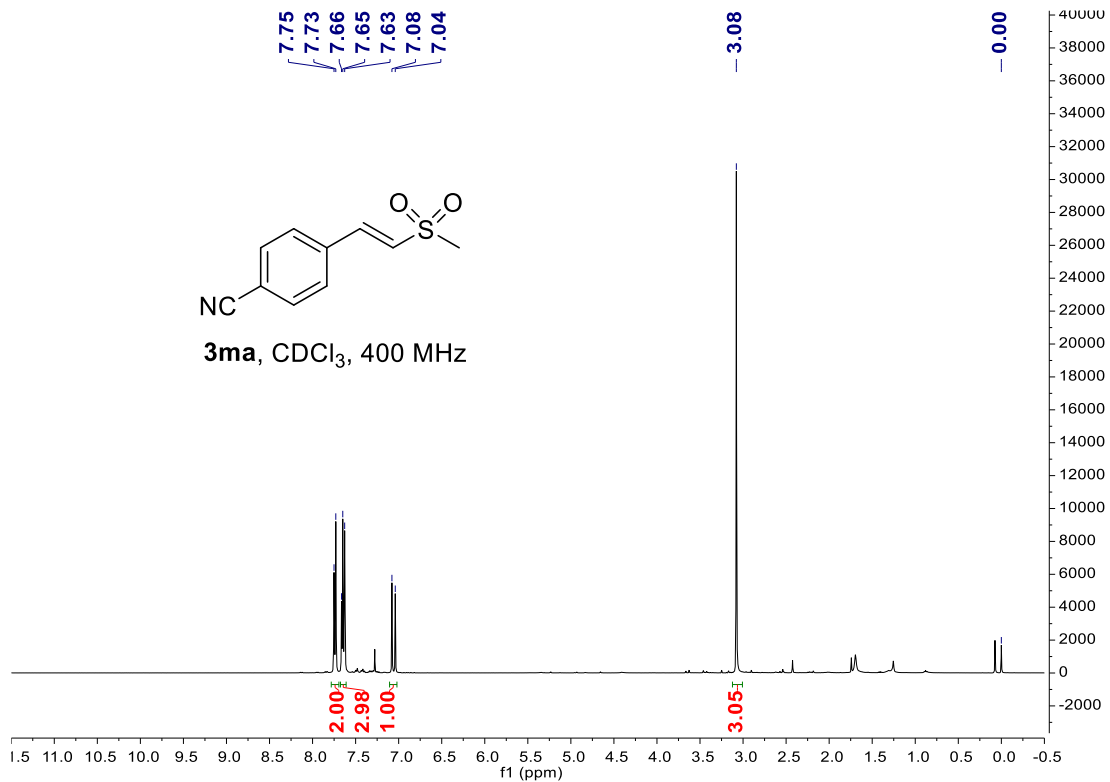

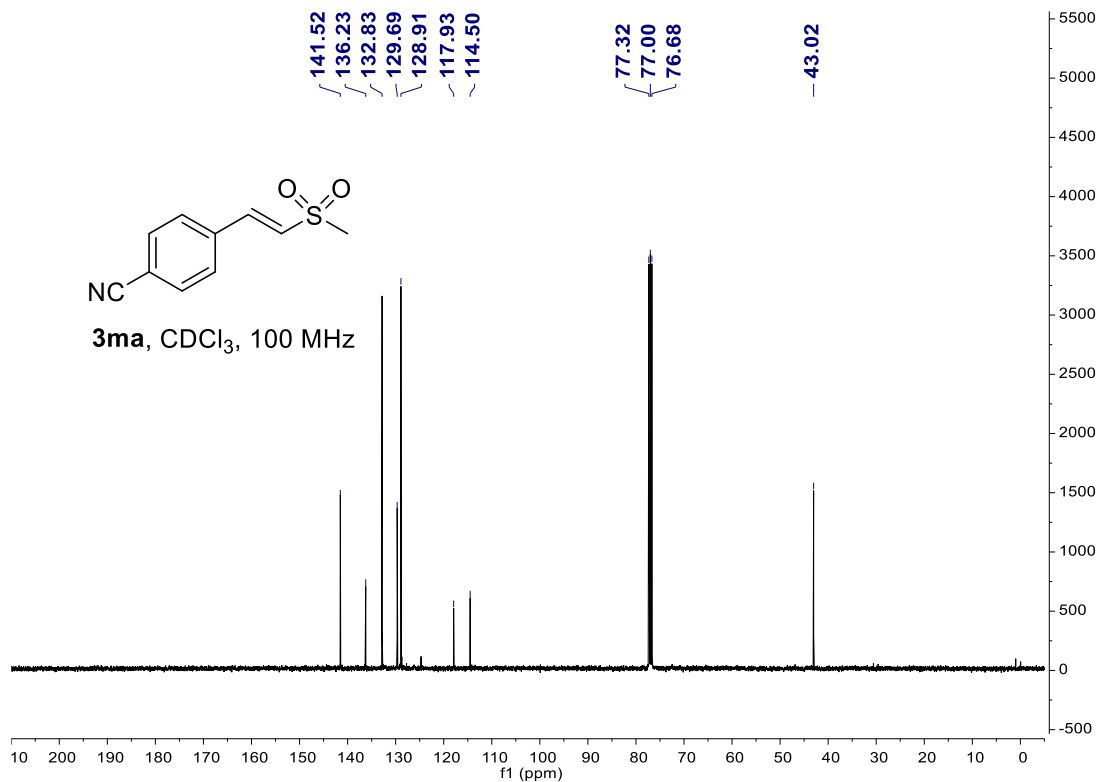

**(E)-1-(4-(2-(methylsulfonyl)vinyl)phenyl)ethan-1-one (3na)**

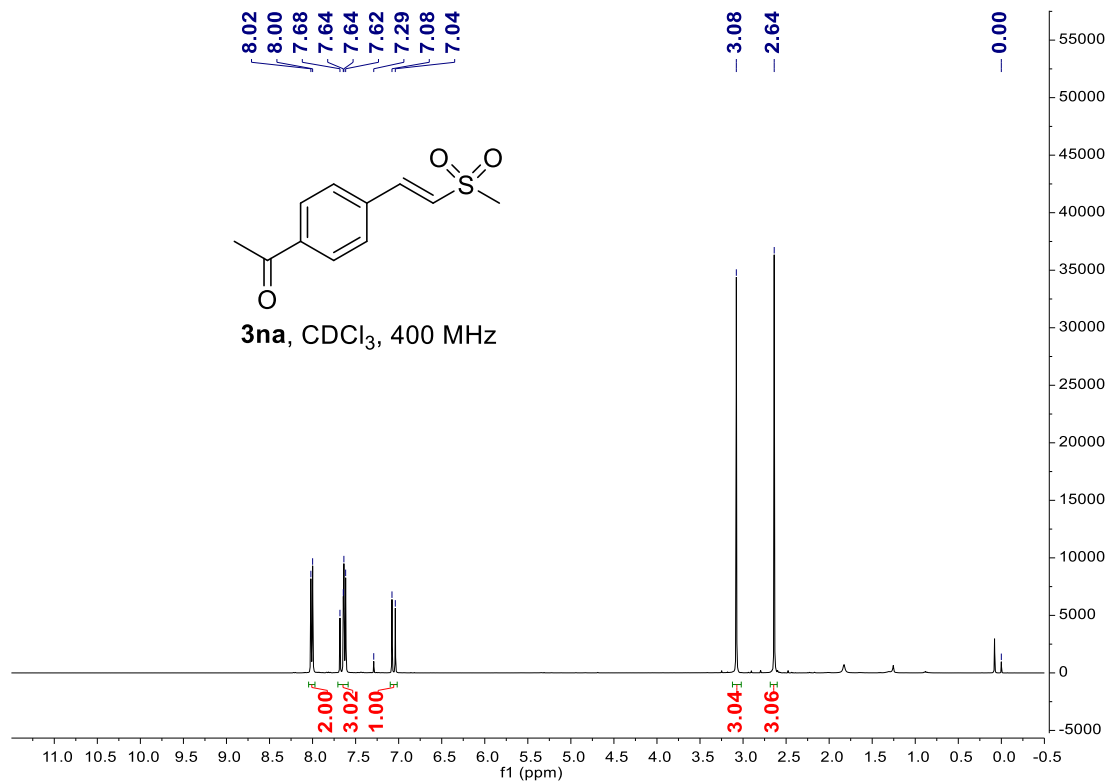

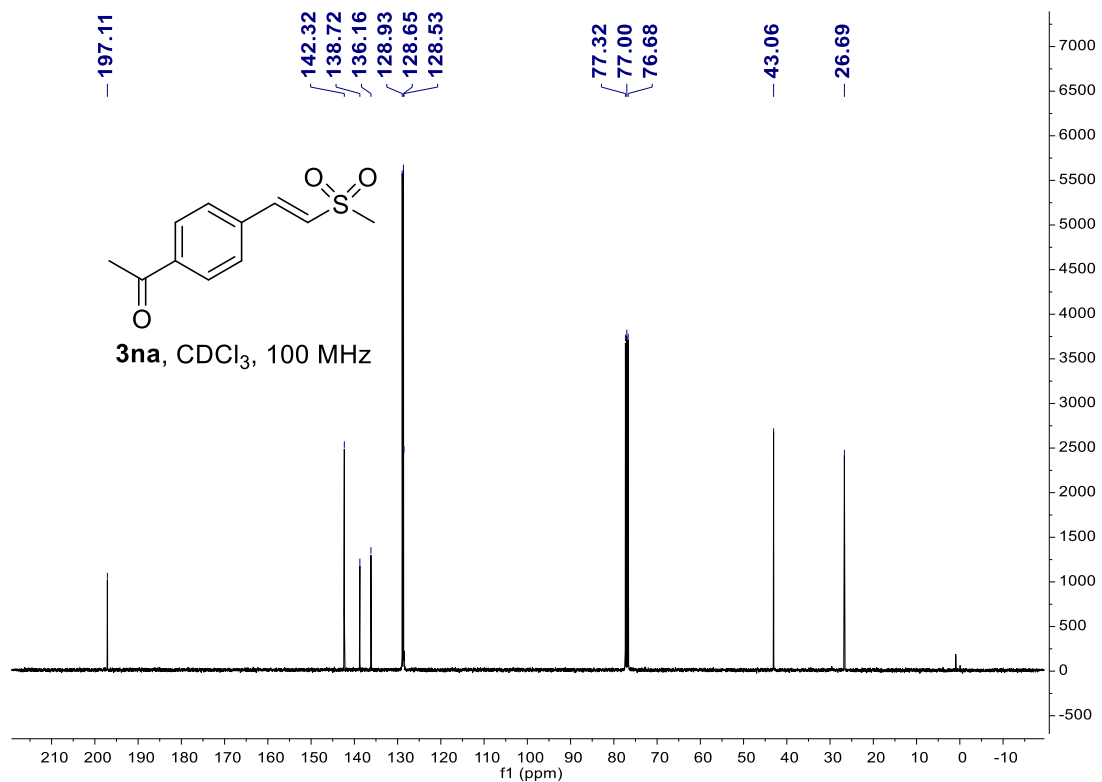

methyl (*E*)-4-(2-(methylsulfonyl)vinyl)benzoate (**3oa**)

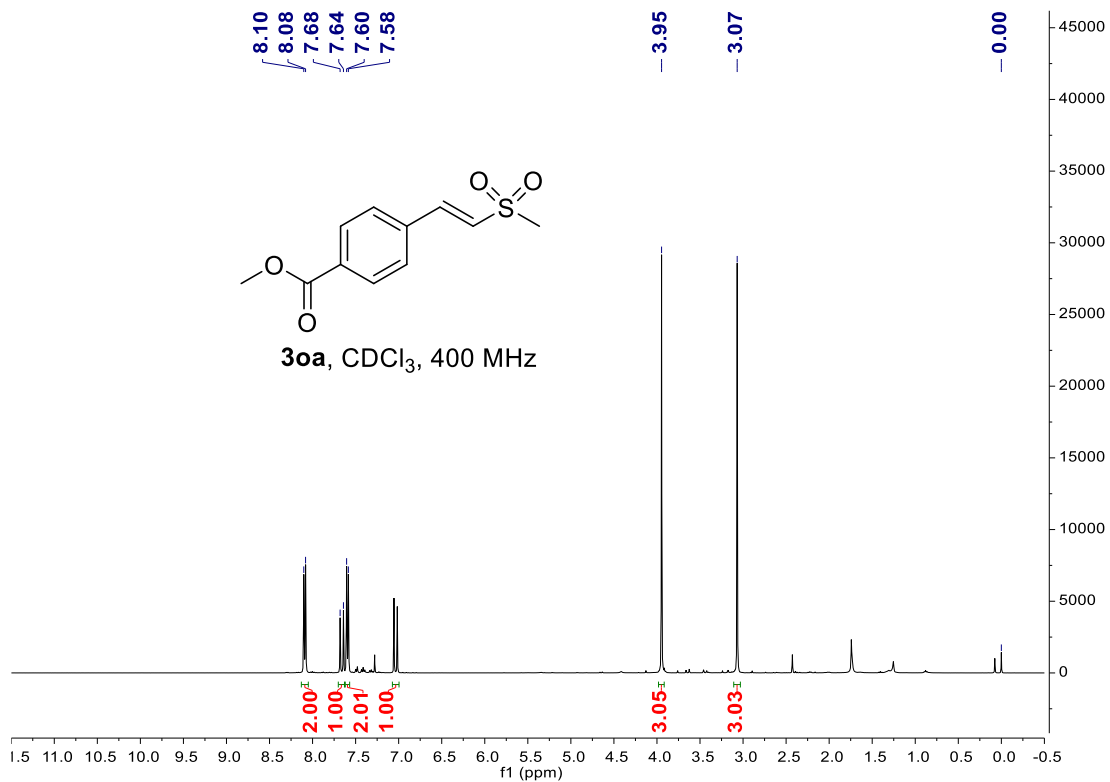

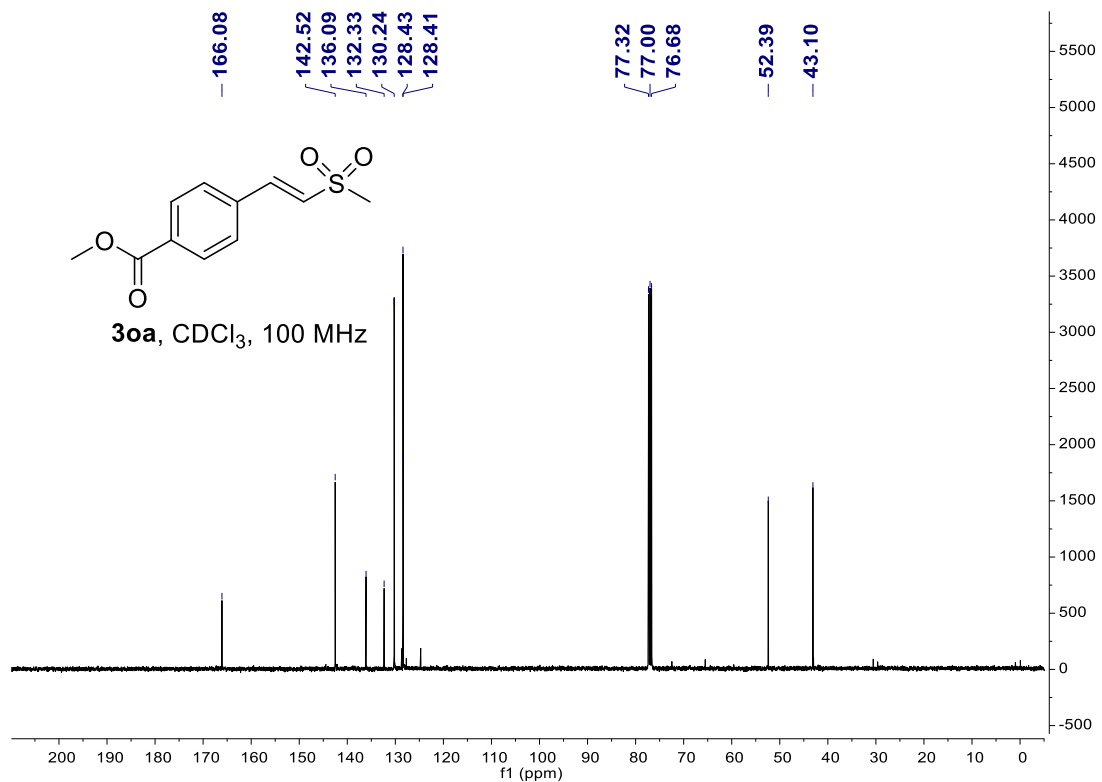

**(E)-1-(2-(methylsulfonyl)vinyl)-4-nitrobenzene (3pa)**

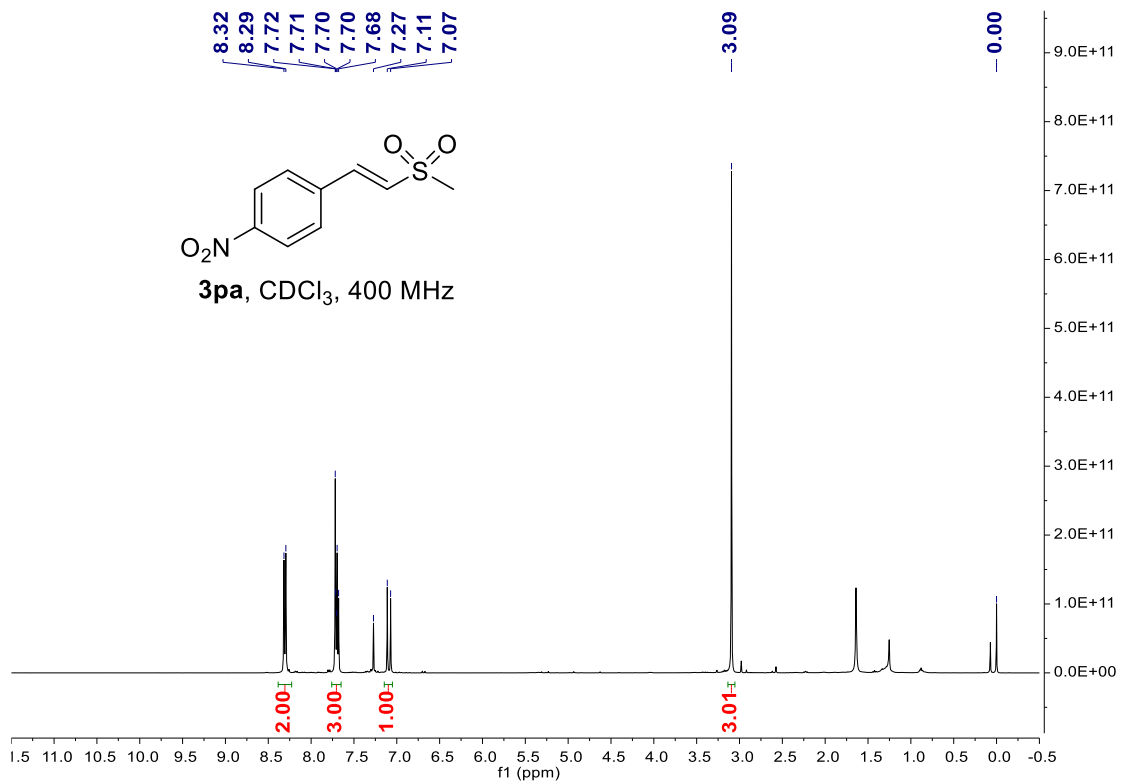

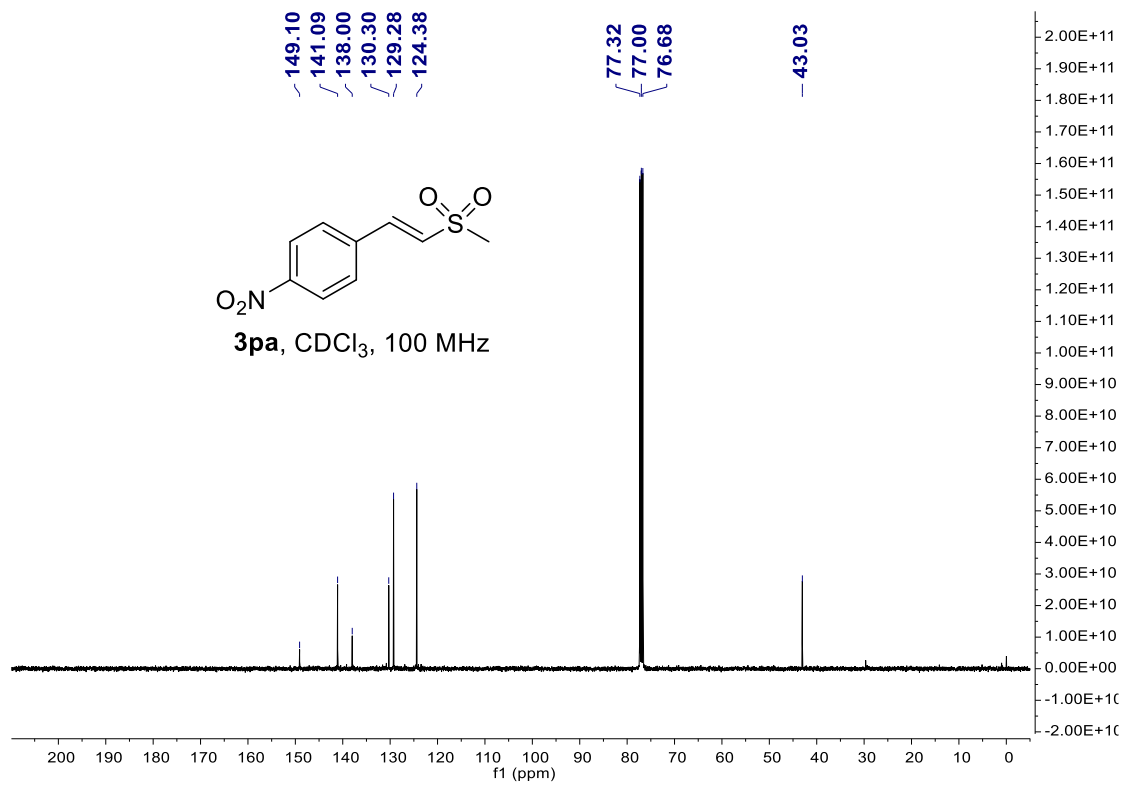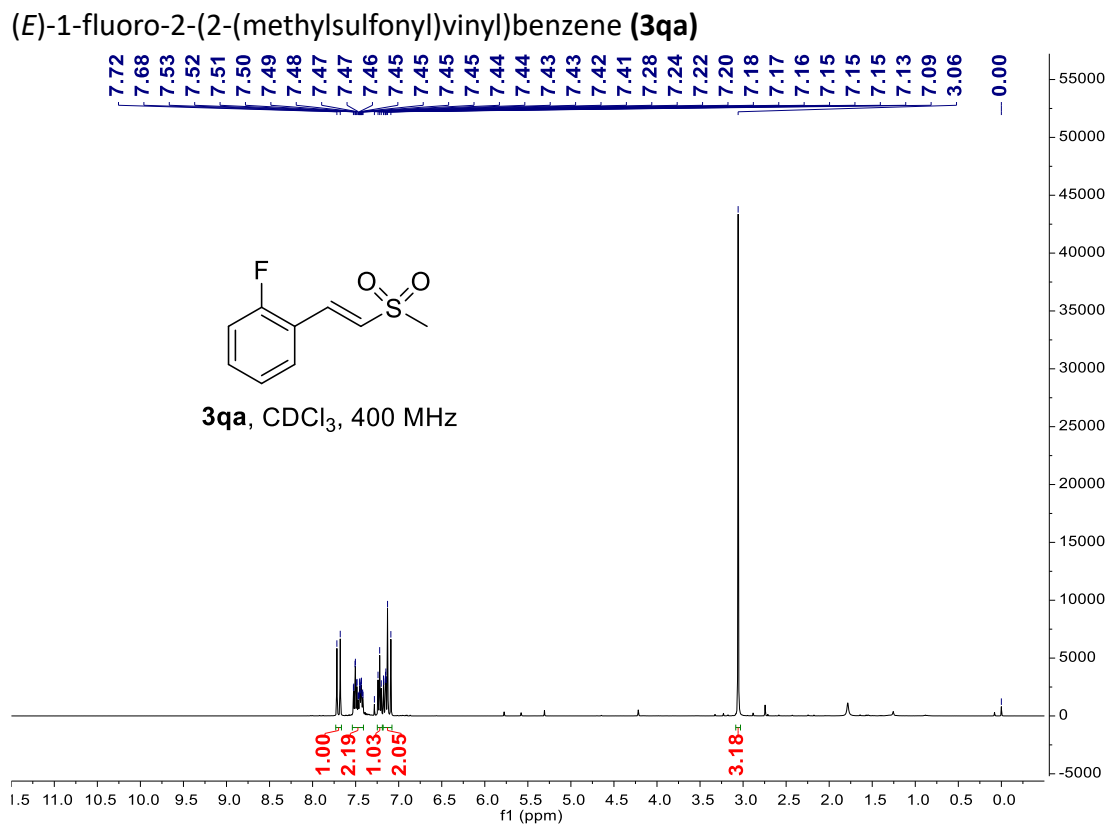

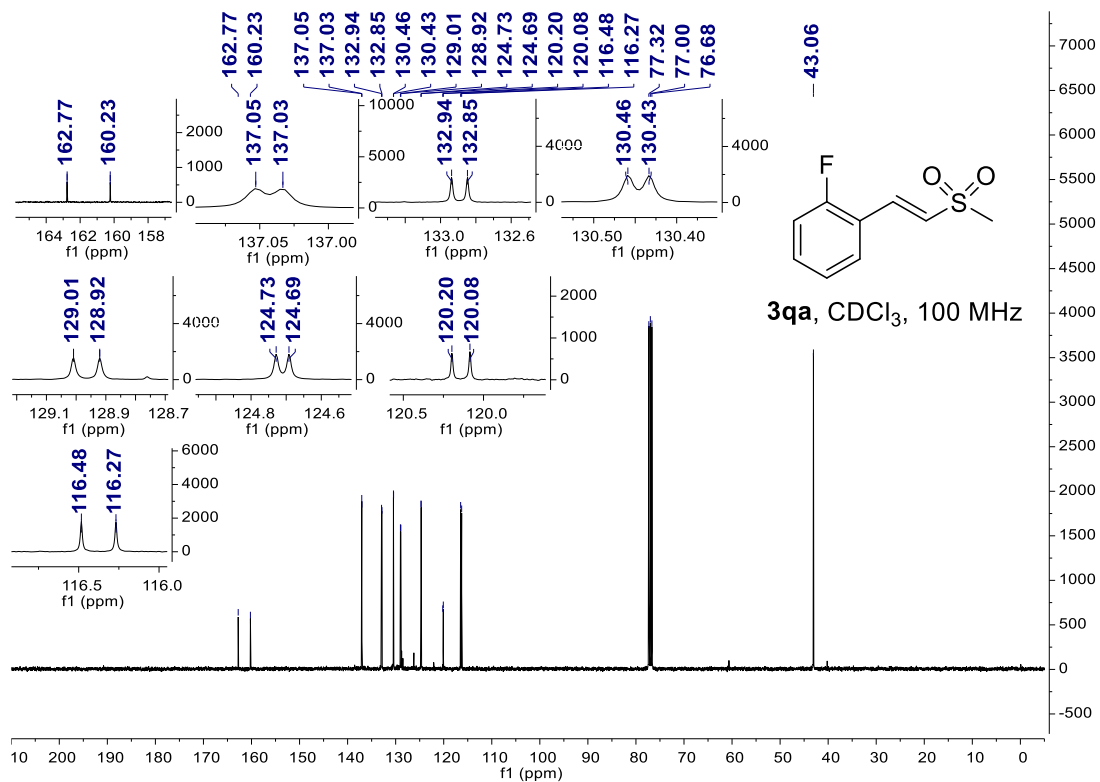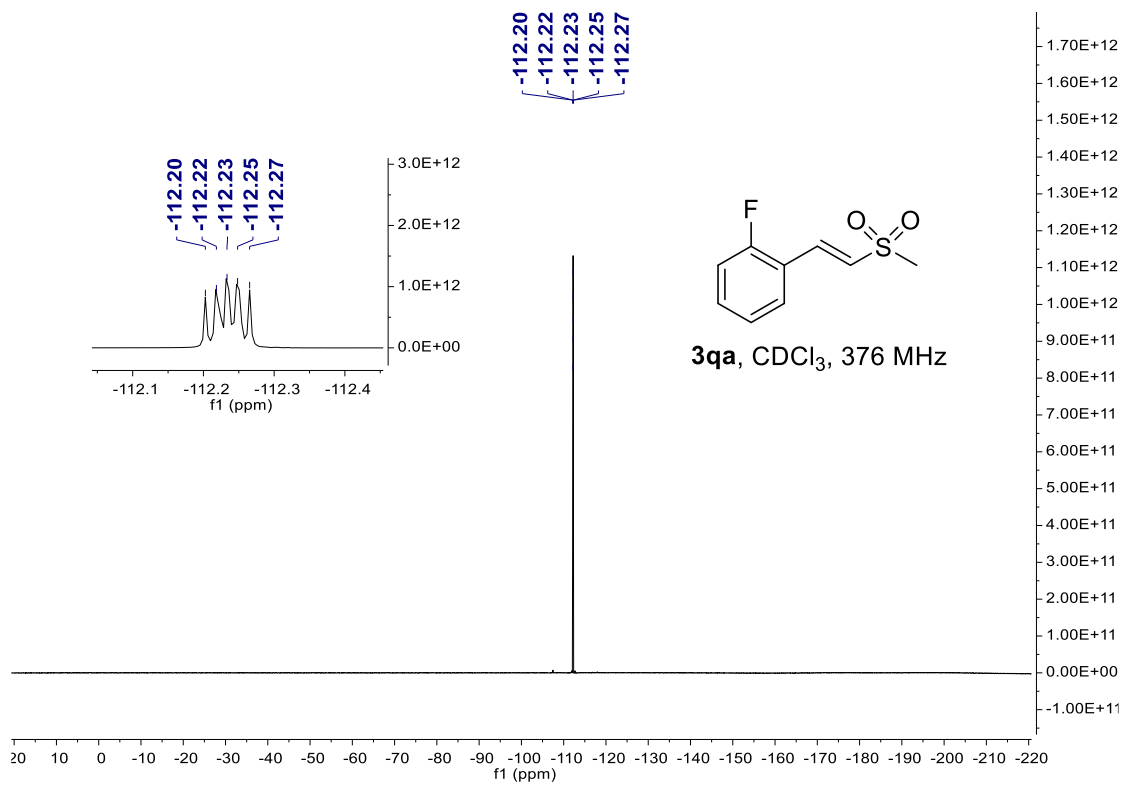

(E)-1-fluoro-3-(2-(methylsulfonyl)vinyl)benzene (**3ra**)

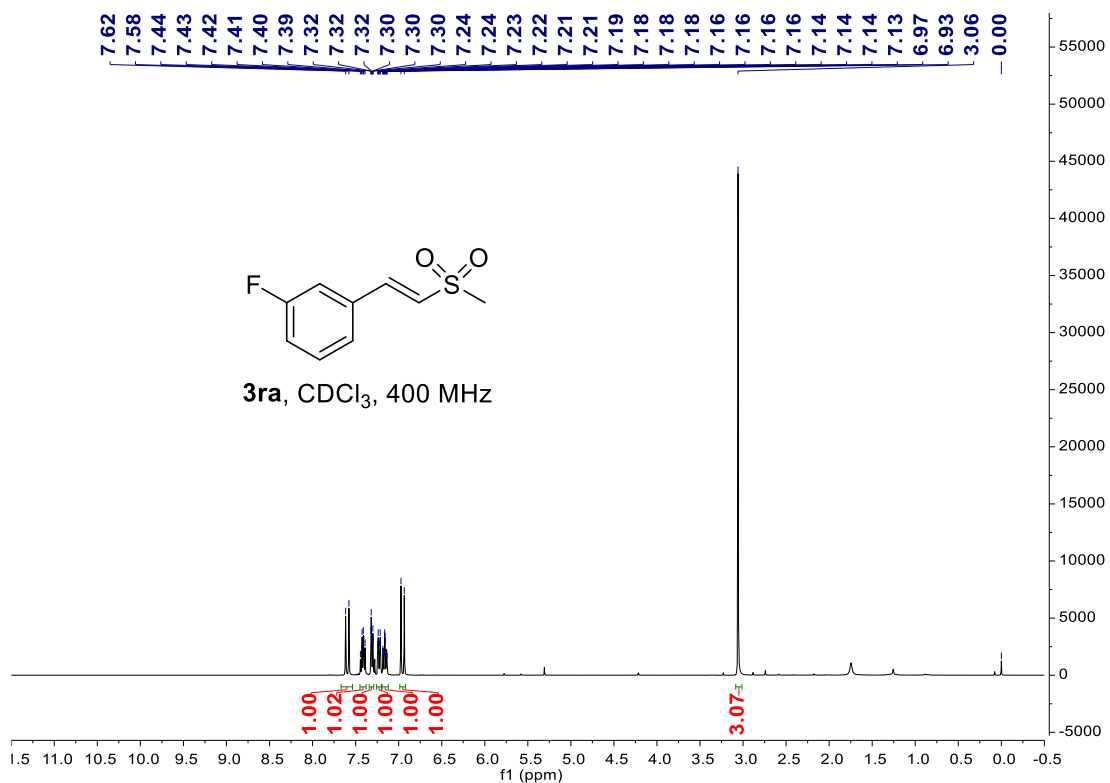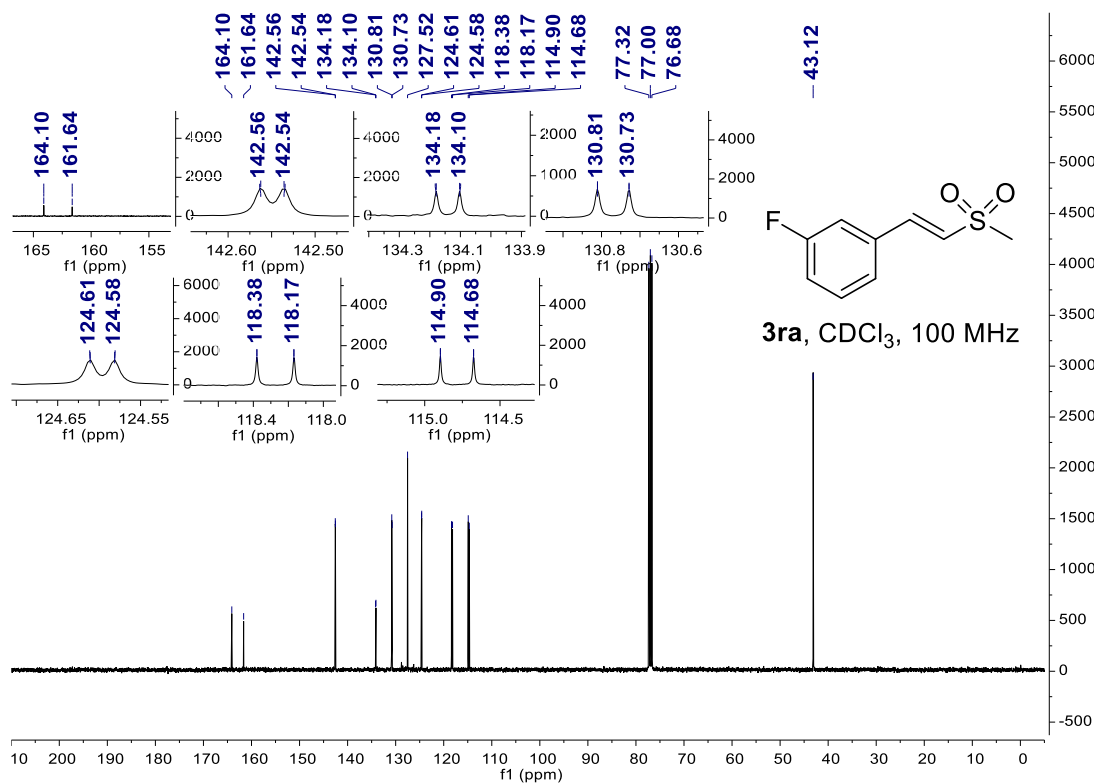

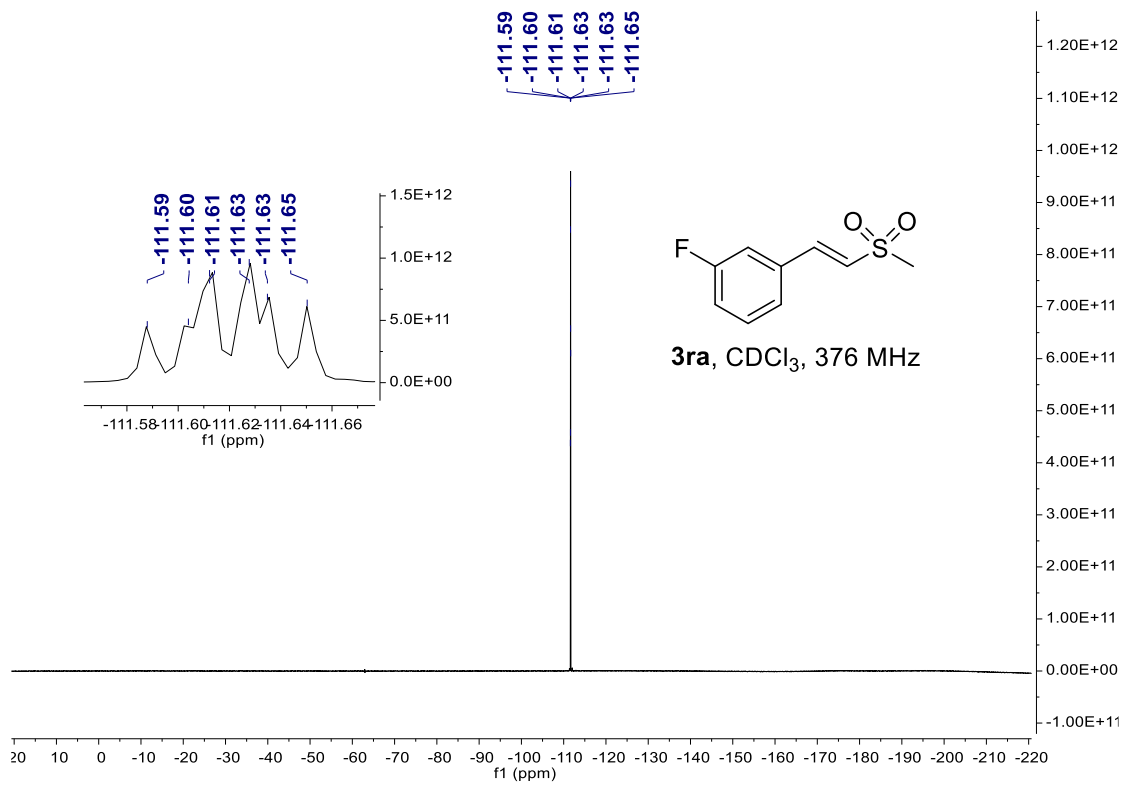

**(E)-1-fluoro-4-(2-(methylsulfonyl)vinyl)benzene (3sa)**

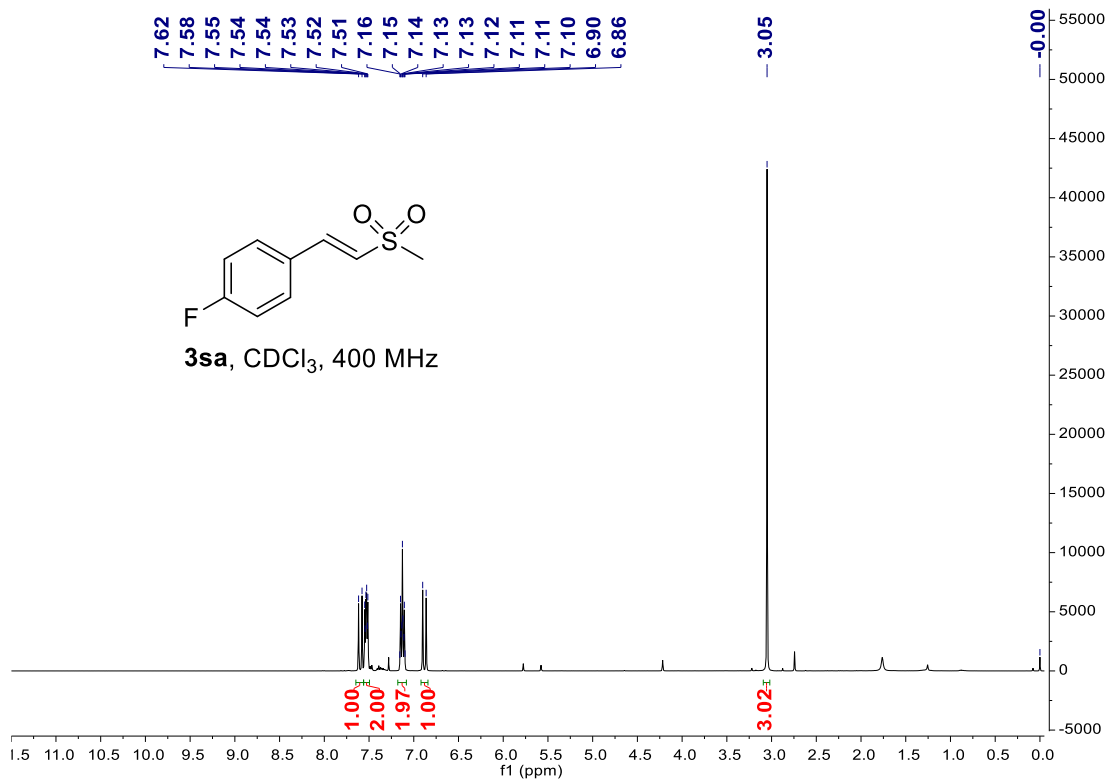



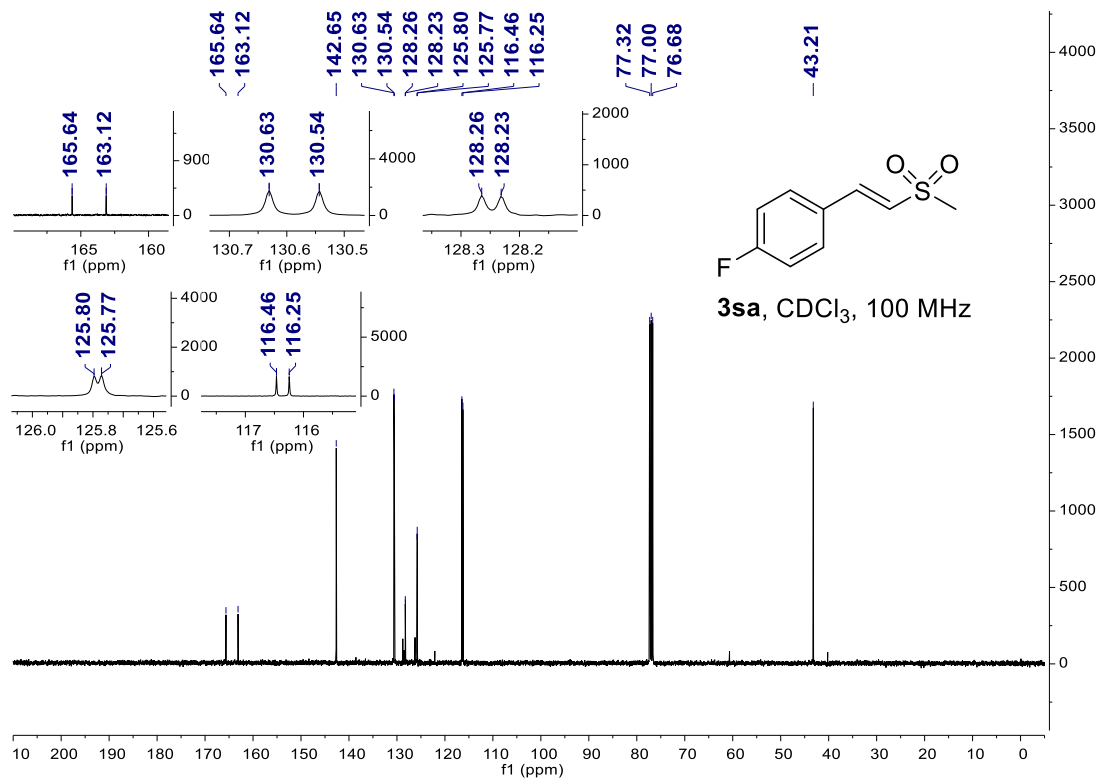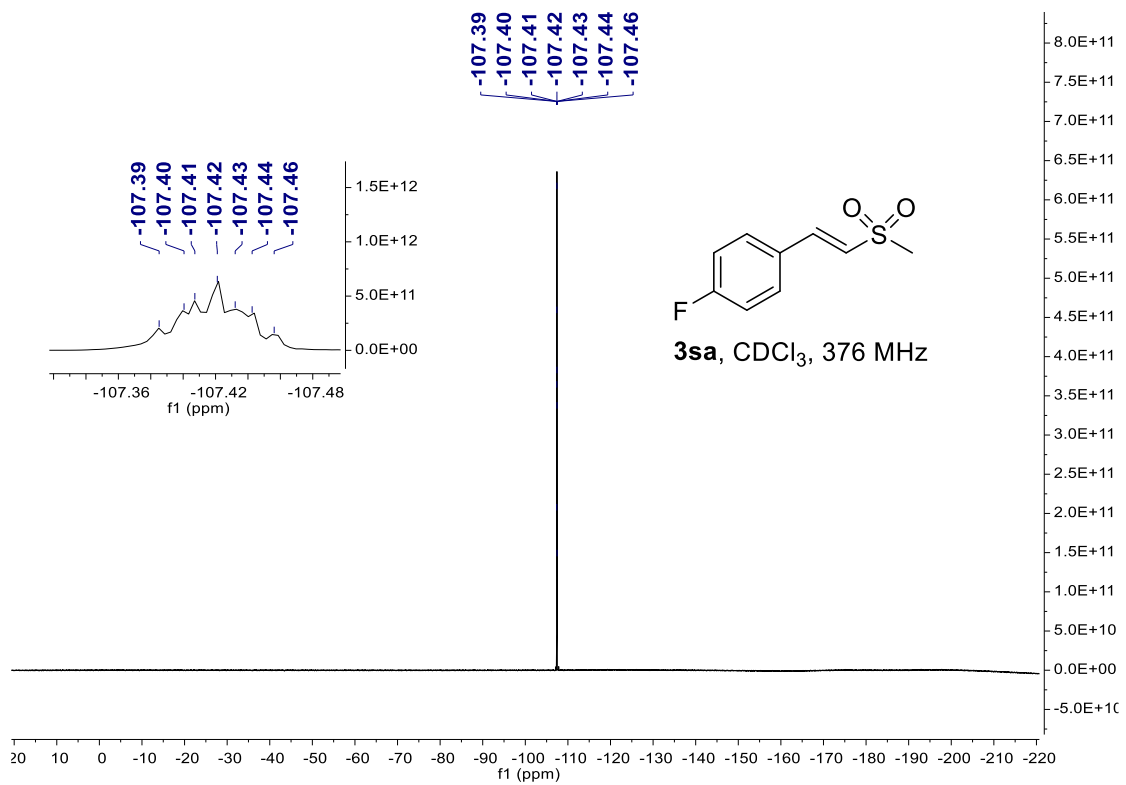

(E)-1-chloro-3-(2-(methylsulfonyl)vinyl)benzene (**3ta**)

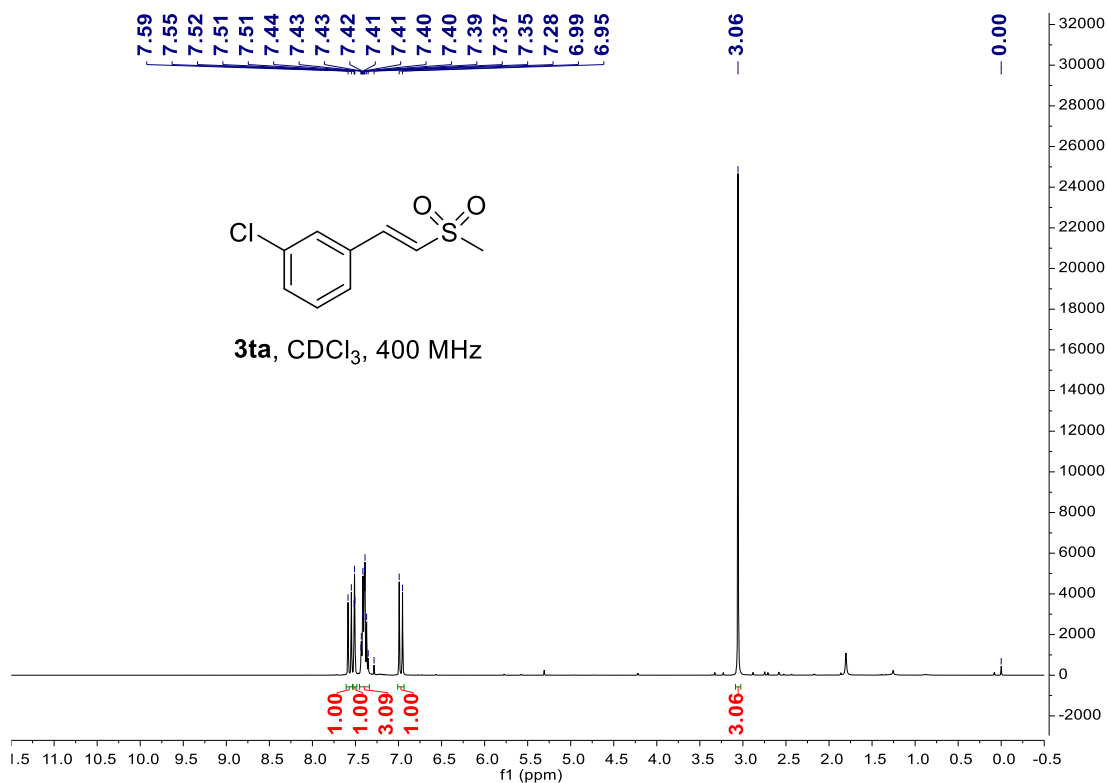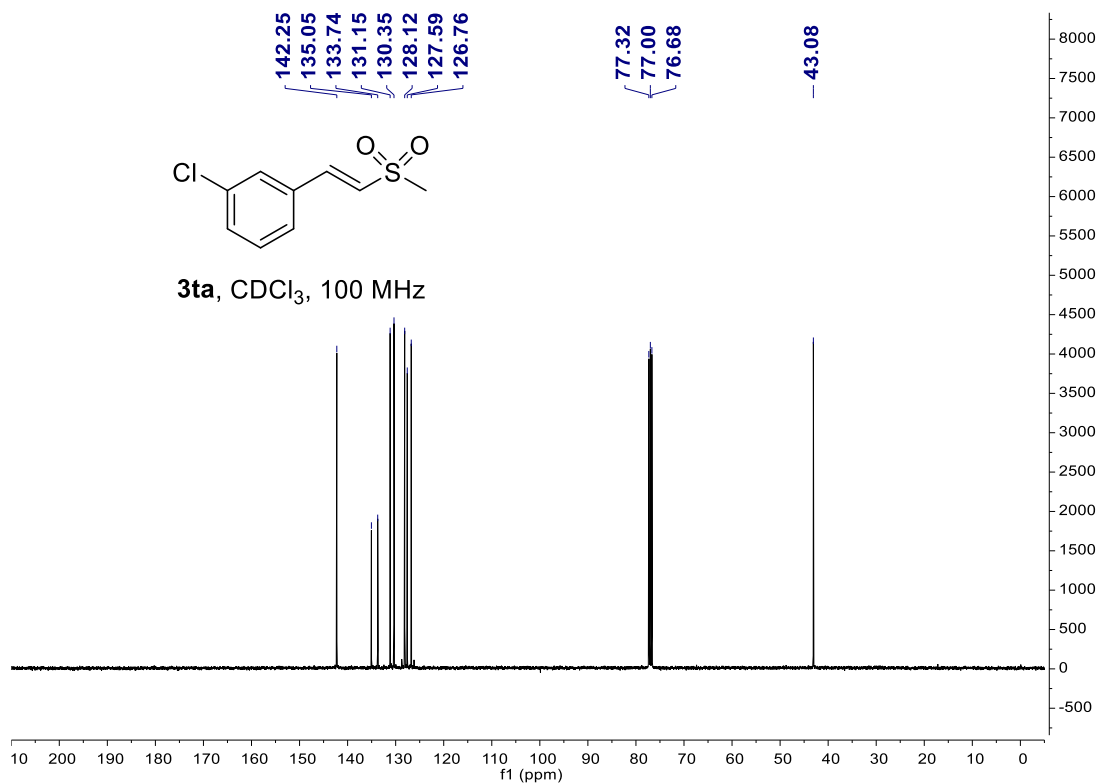

(E)-1-chloro-4-(2-(methylsulfonyl)vinyl)benzene (**3ua**)

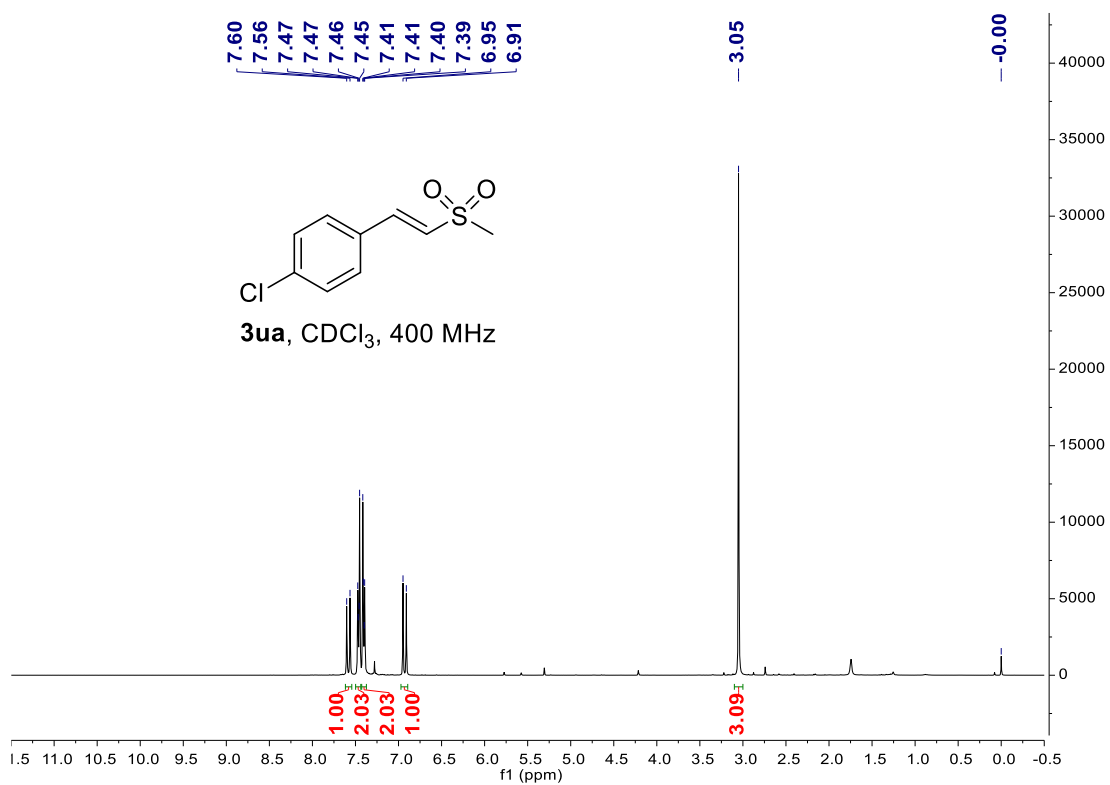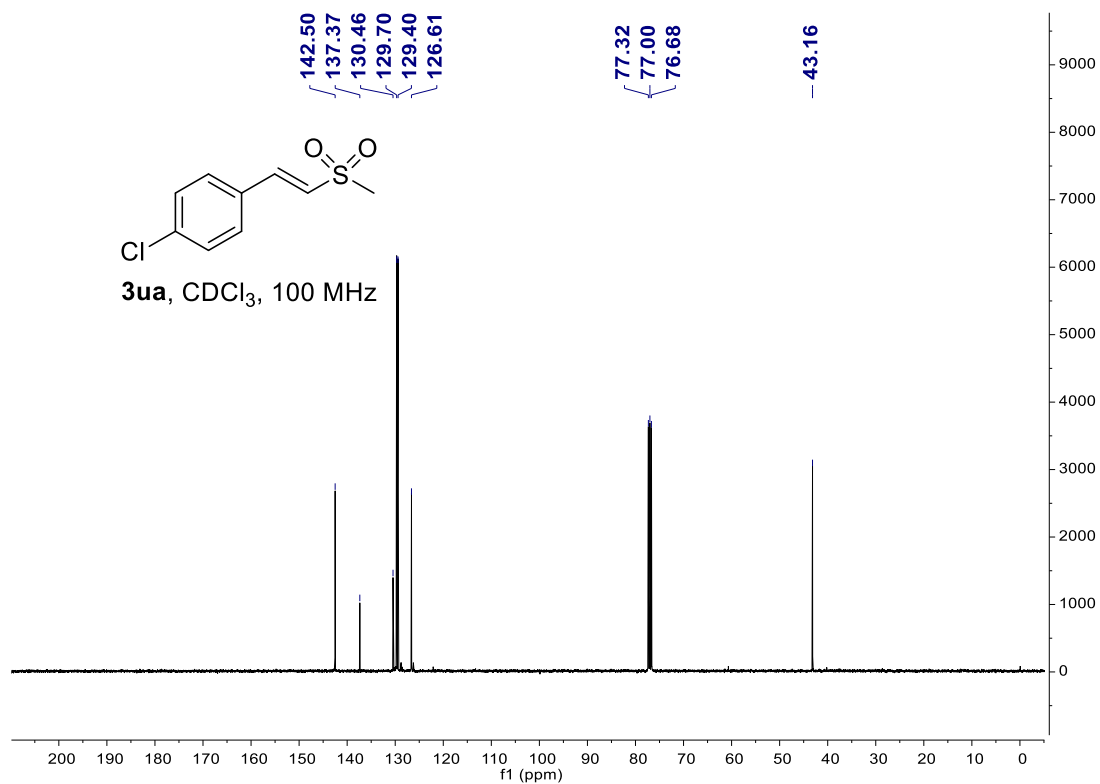

(E)-1-bromo-4-(2-(methylsulfonyl)vinyl)benzene (**3va**)

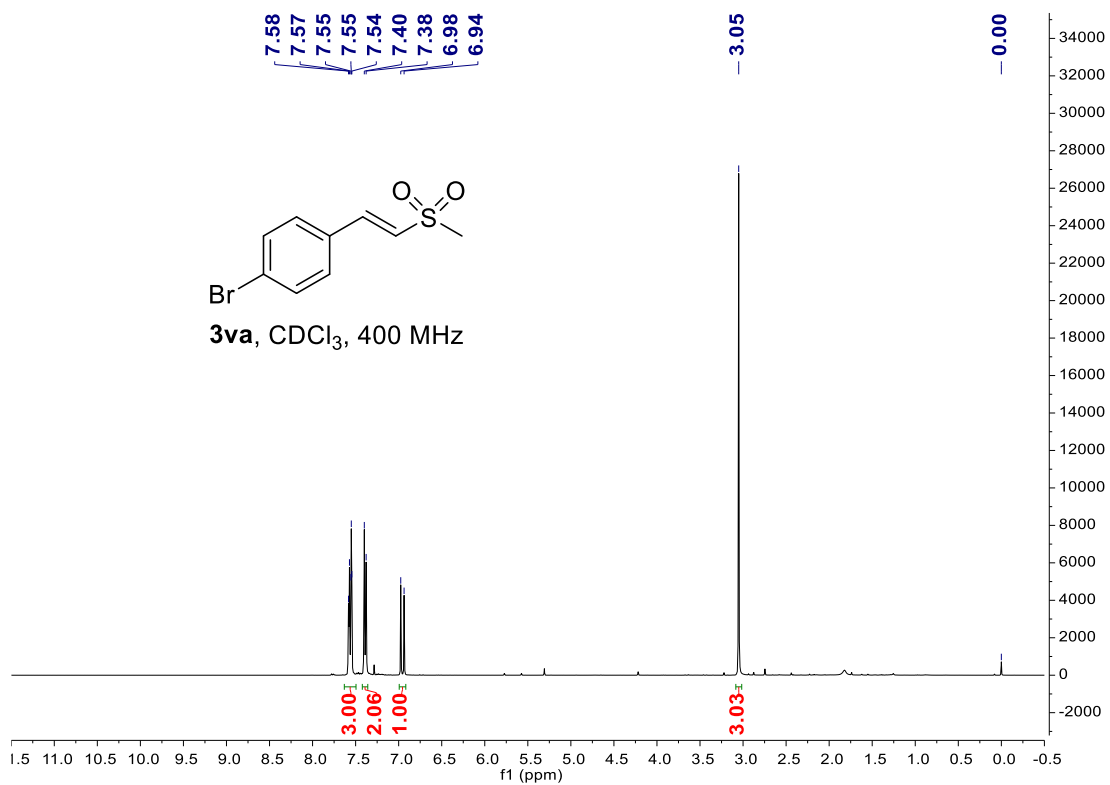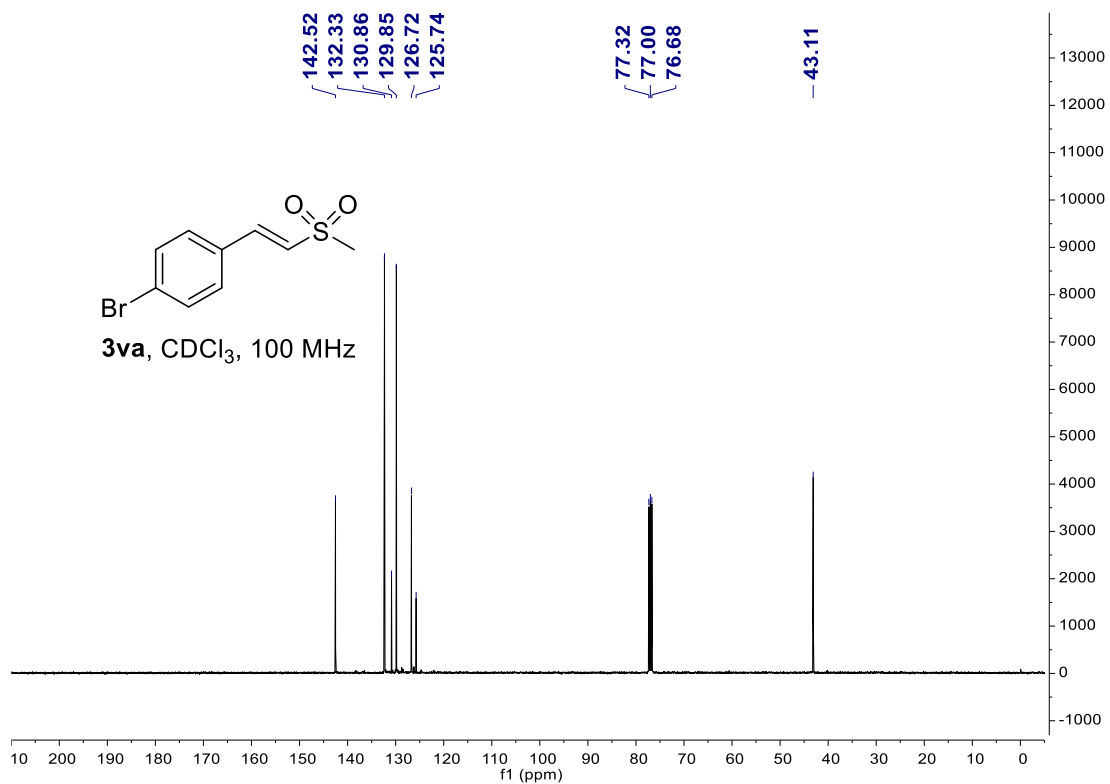

(E)-1,3,5-trimethyl-2-(2-(methylsulfonyl)vinyl)benzene (**3wa**)

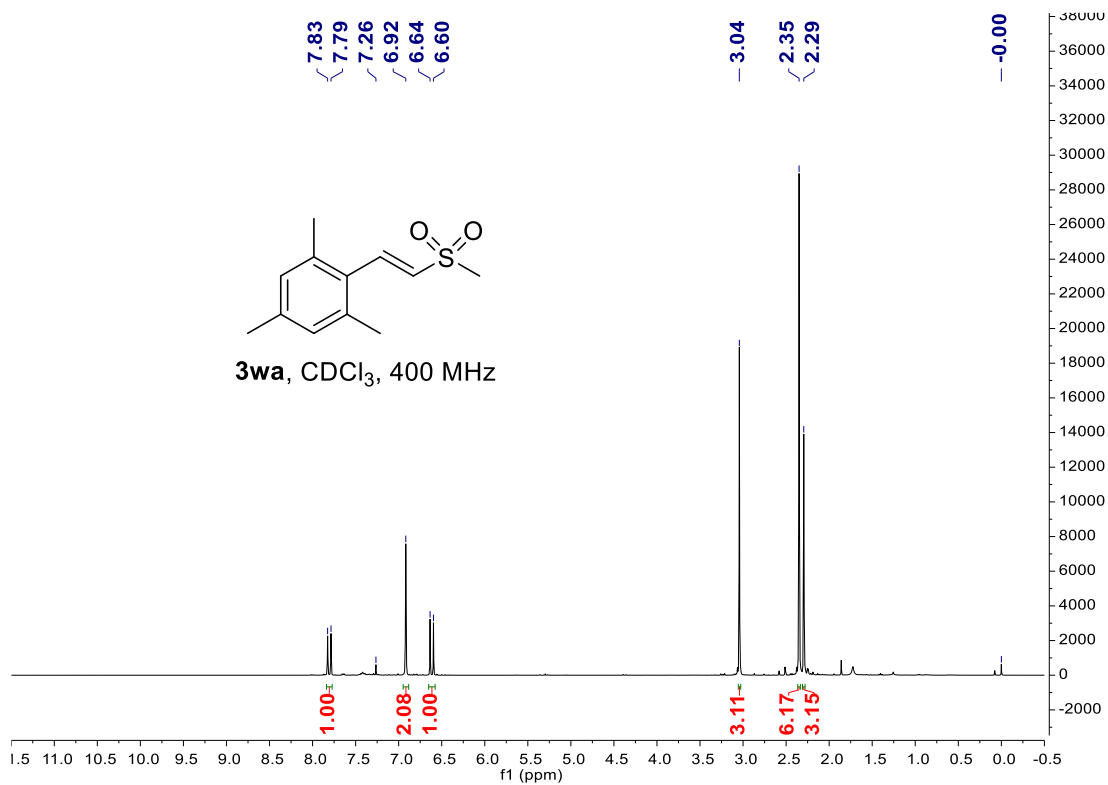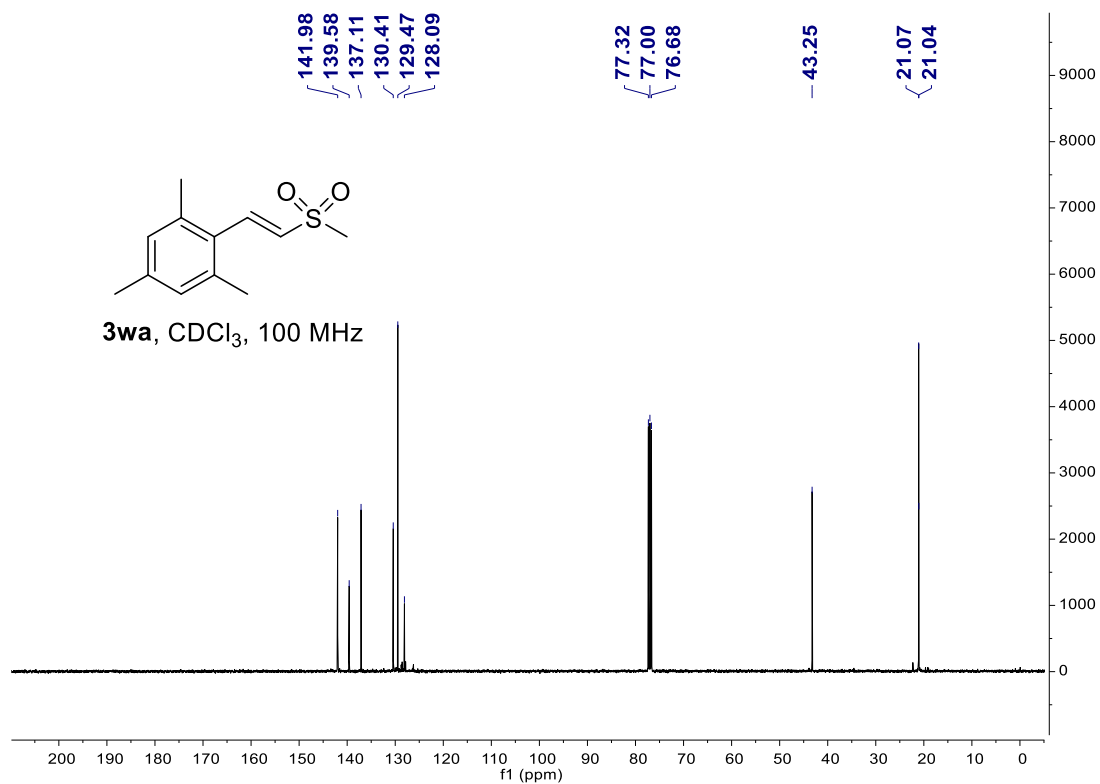

(E)-1,2-dimethoxy-4-(2-(methylsulfonyl)vinyl)benzene (**3xa**)

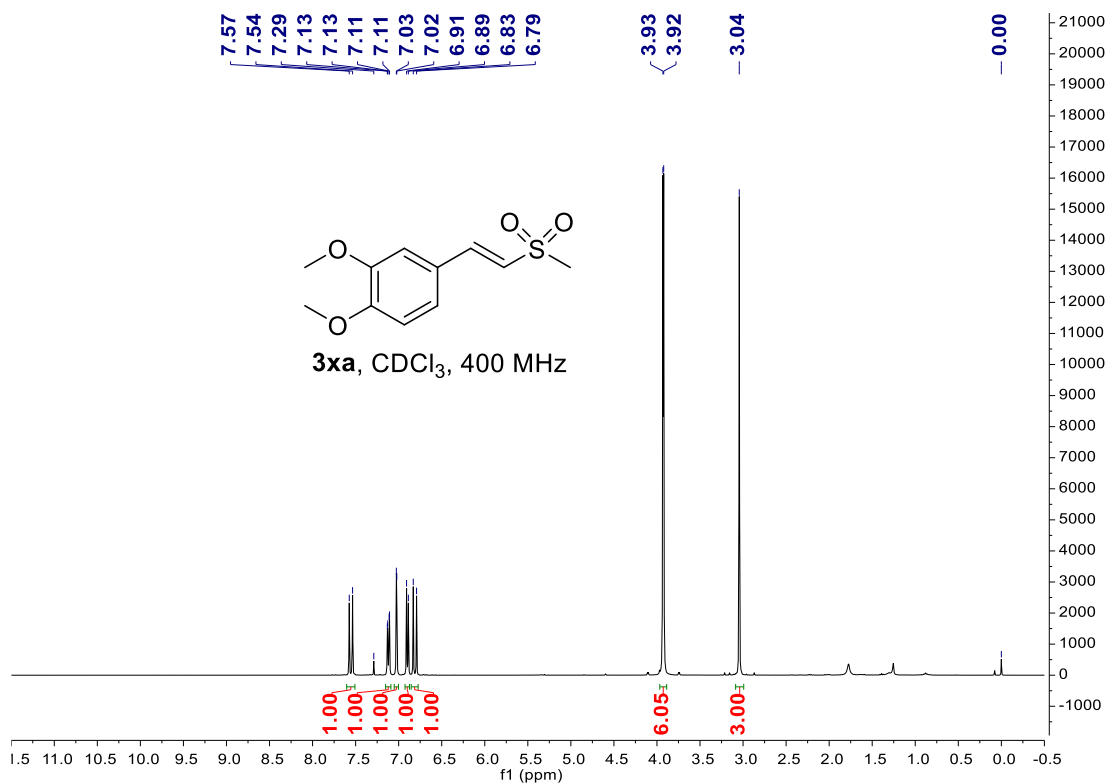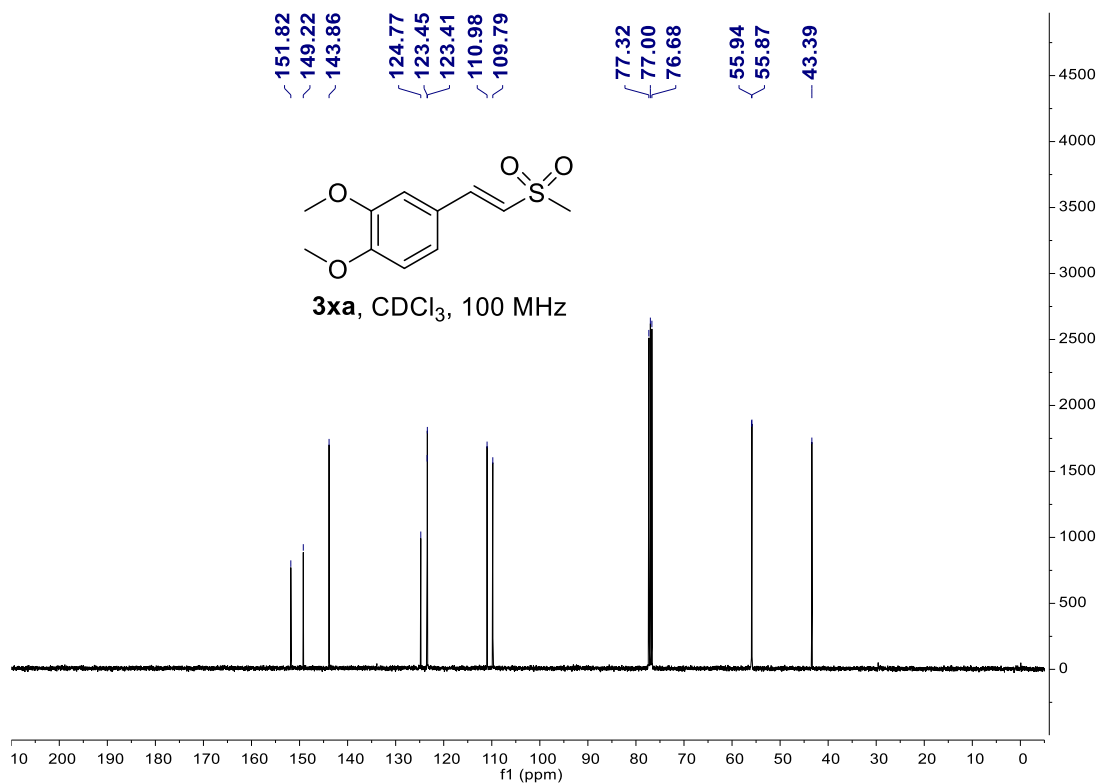

(E)-1-(2-(methylsulfonyl)vinyl)naphthalene (**3ya**)

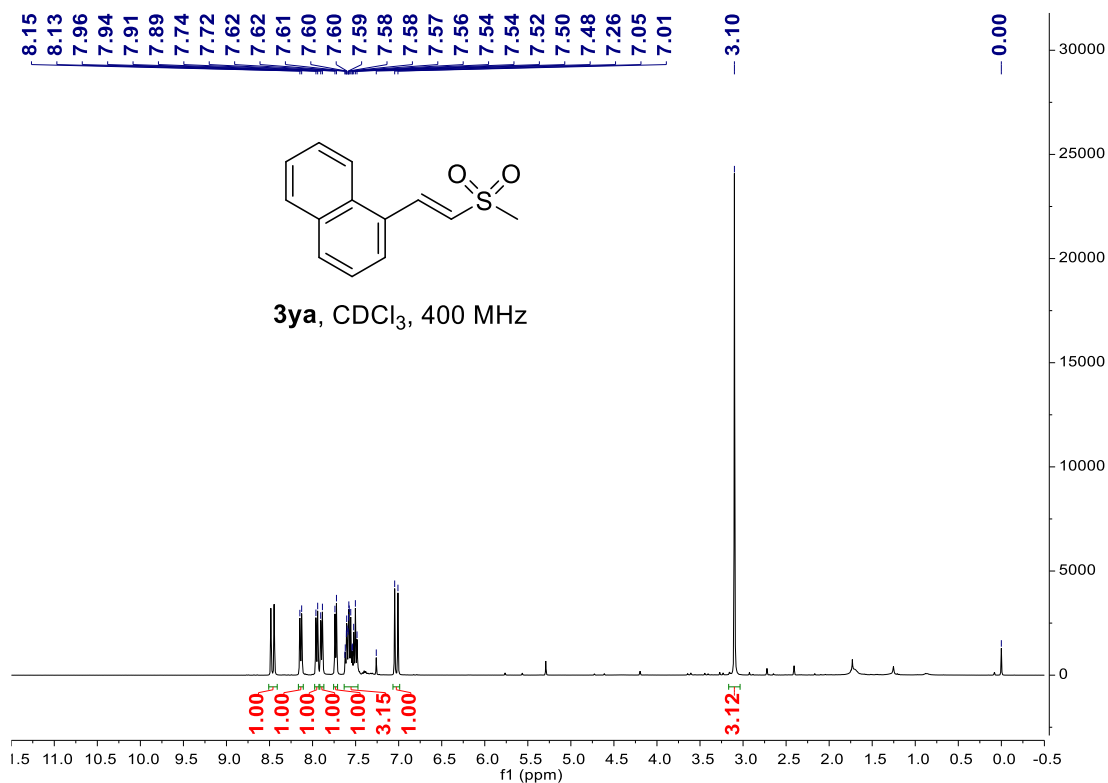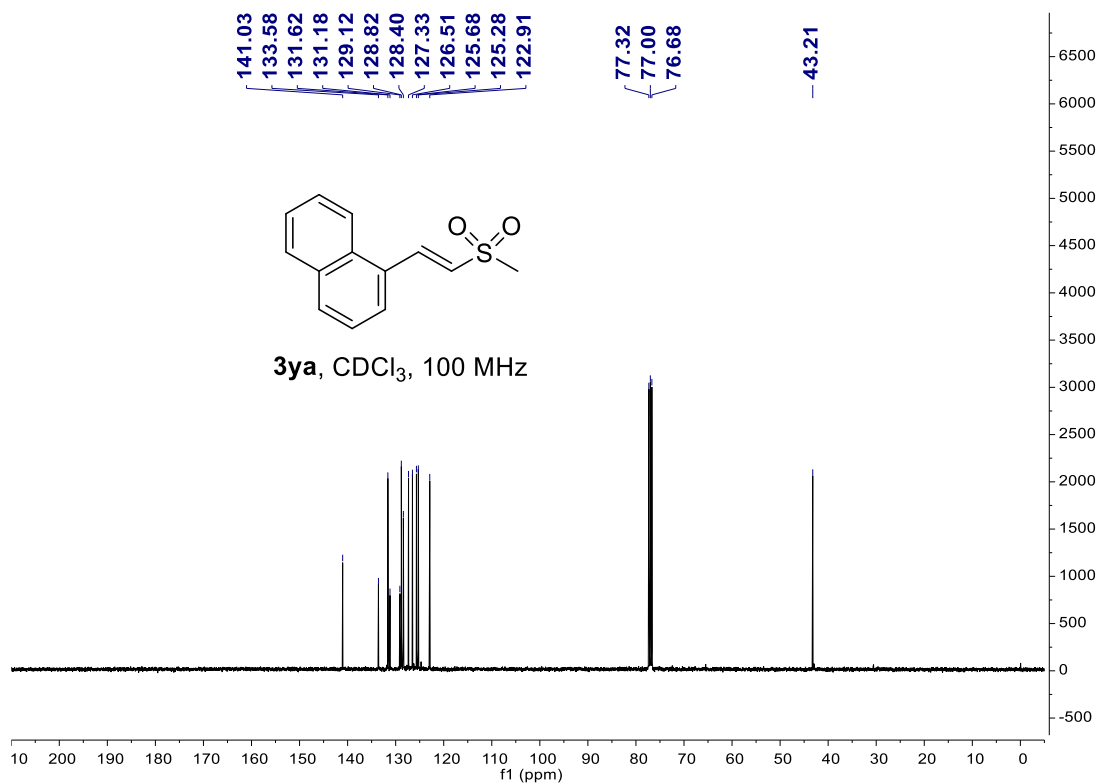

(E)-2-(2-(methylsulfonyl)vinyl)naphthalene (**3za**)

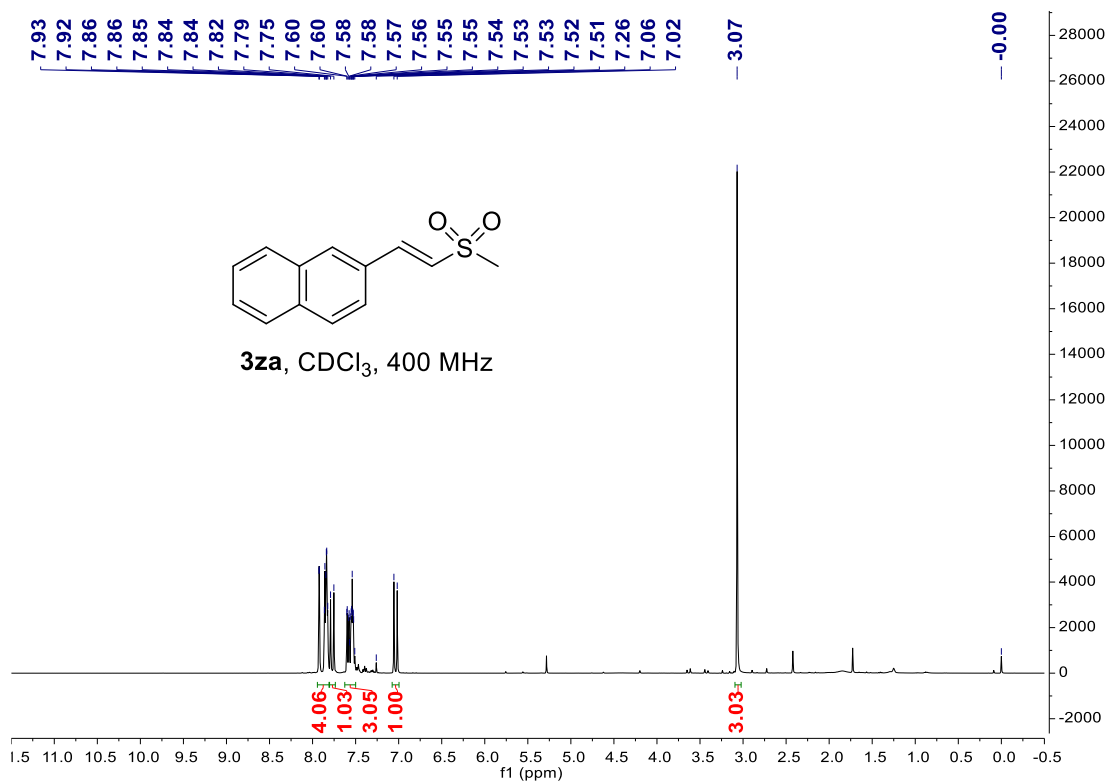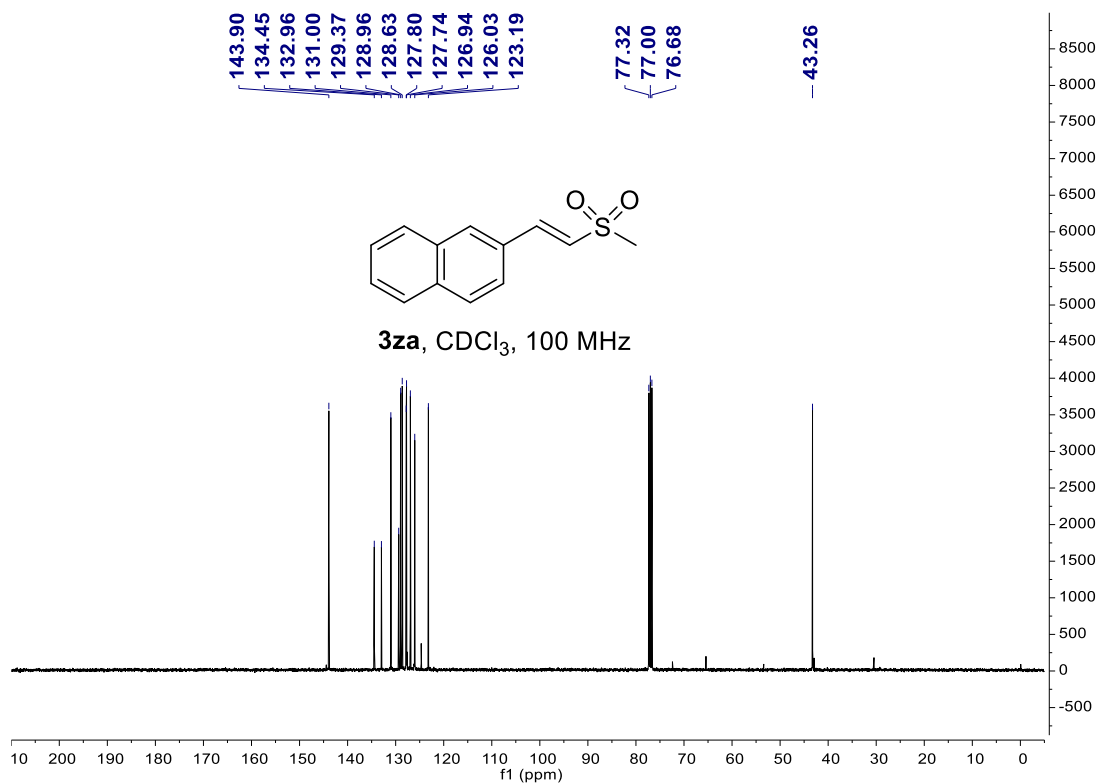



(E)-2-(2-(methylsulfonyl)vinyl)thiophene (**3a'a**)

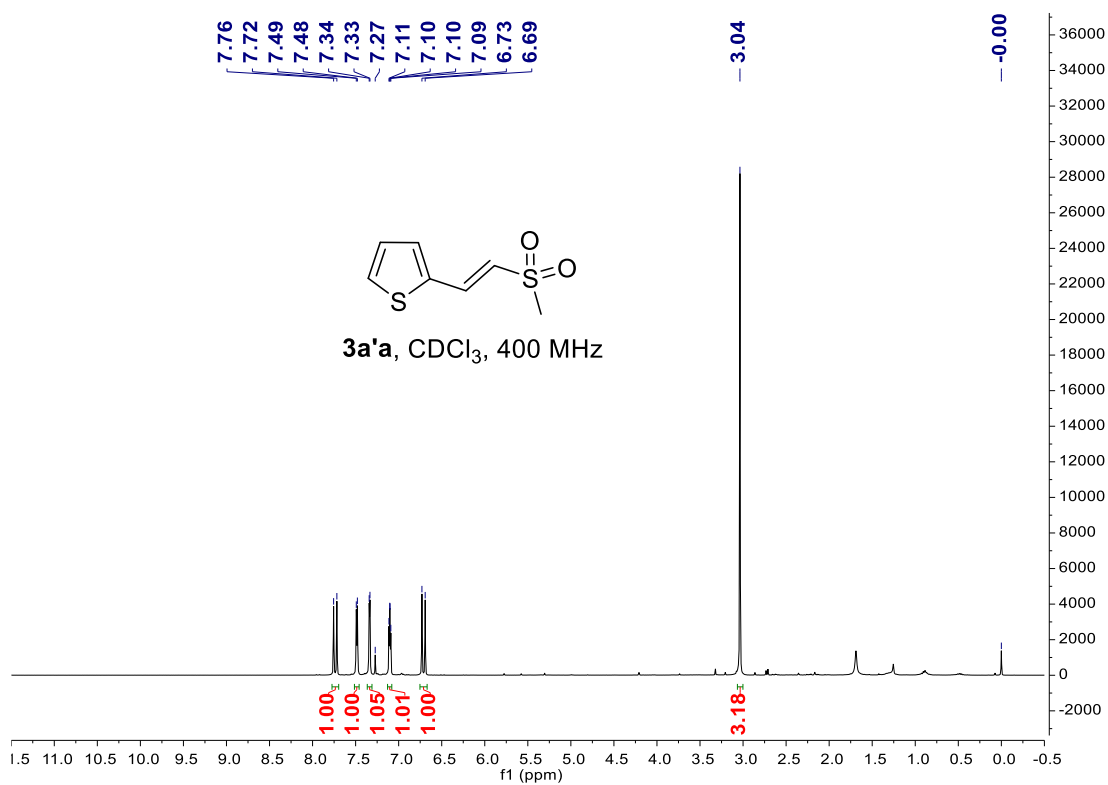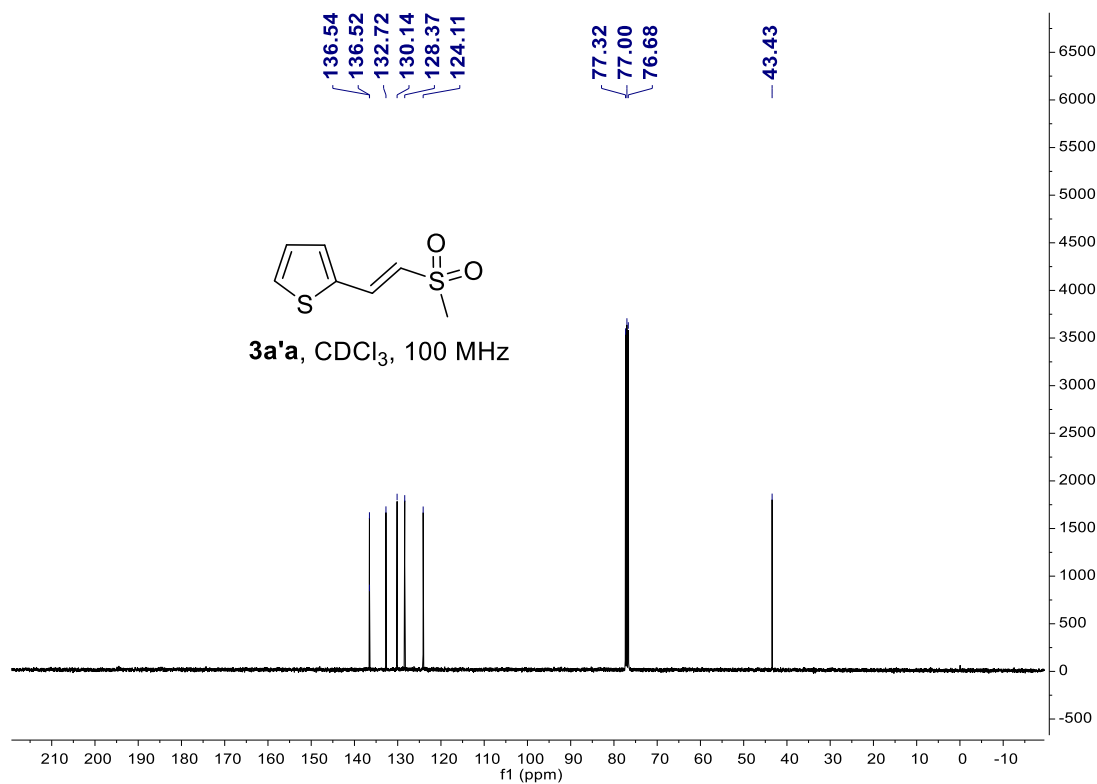

(E)-4-methyl-5-(2-(methylsulfonyl)vinyl)thiazole (**3b'a**)

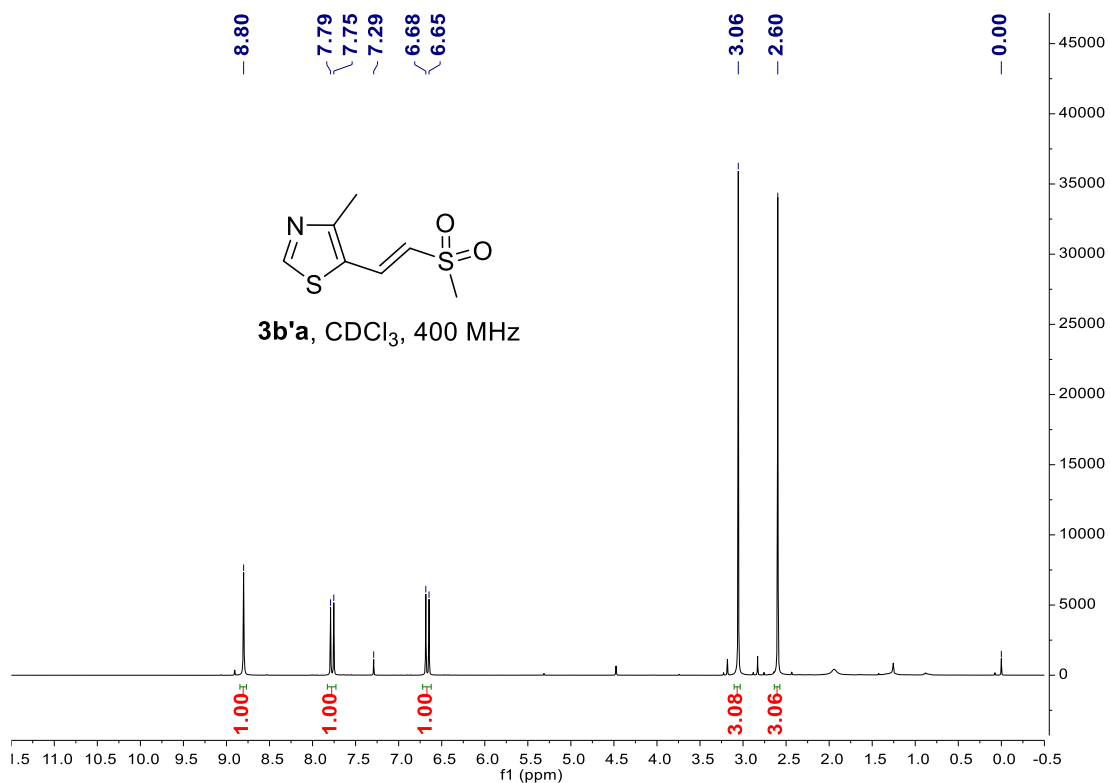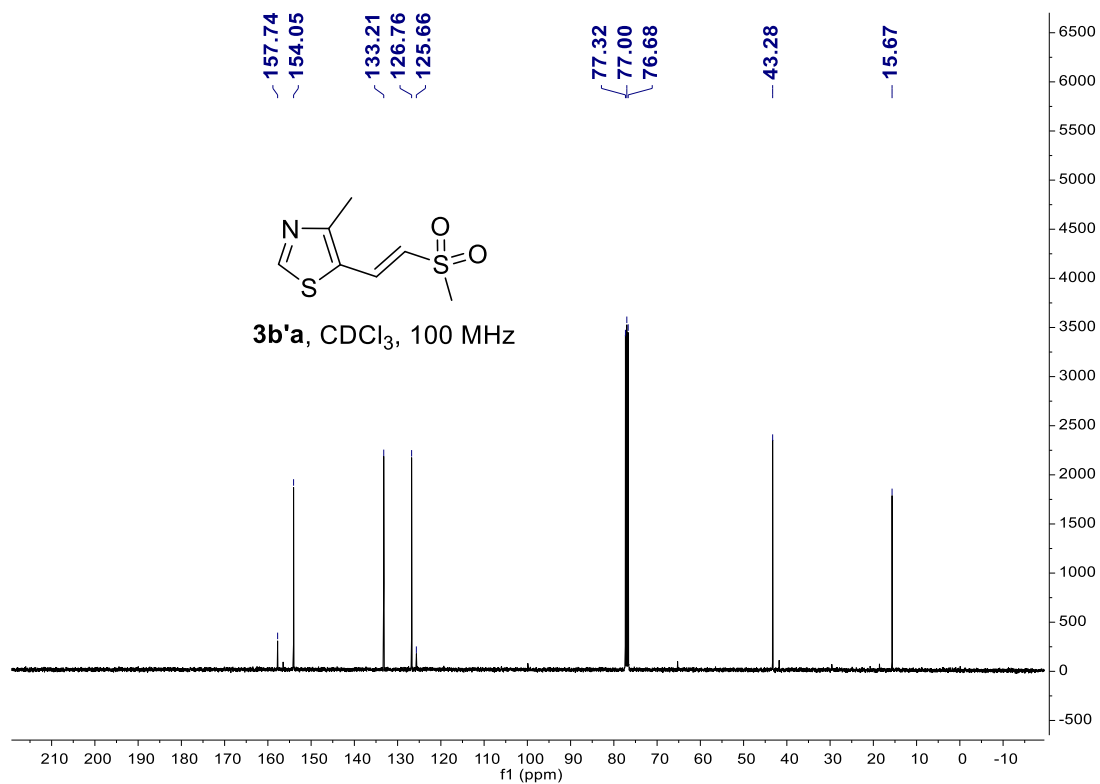

(E)-4-(2-(methylsulfonyl)vinyl)pyridine (**3c'a**)

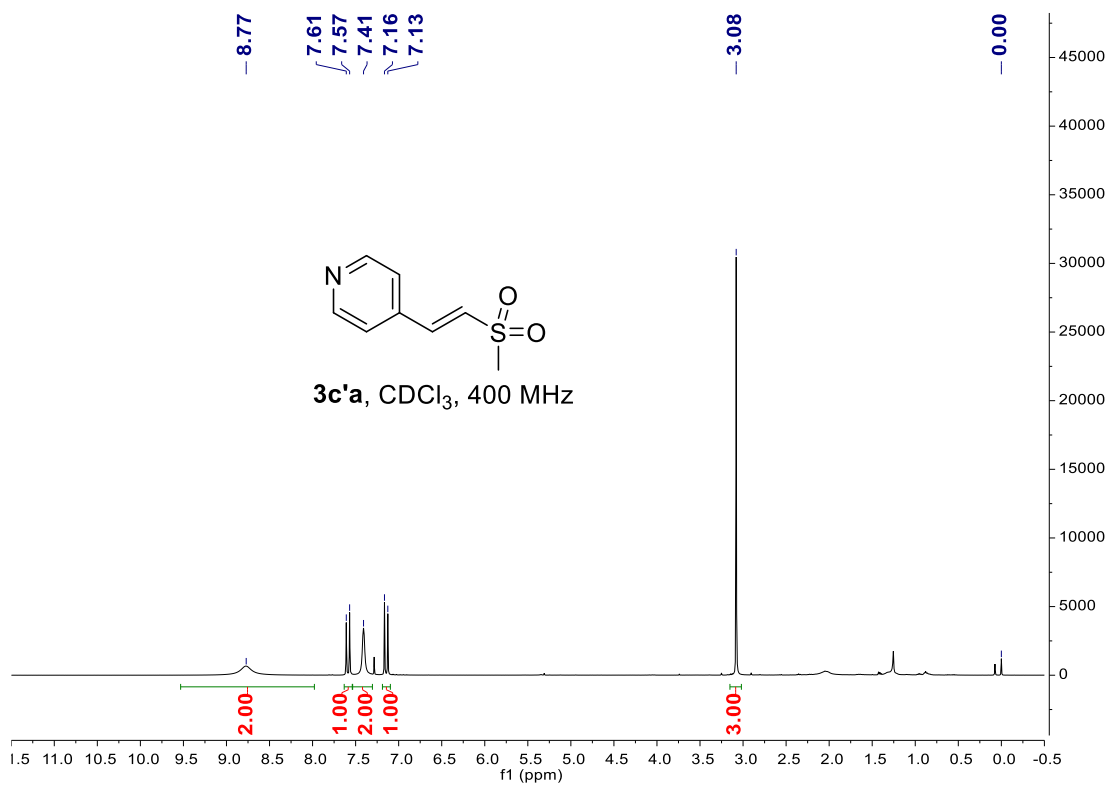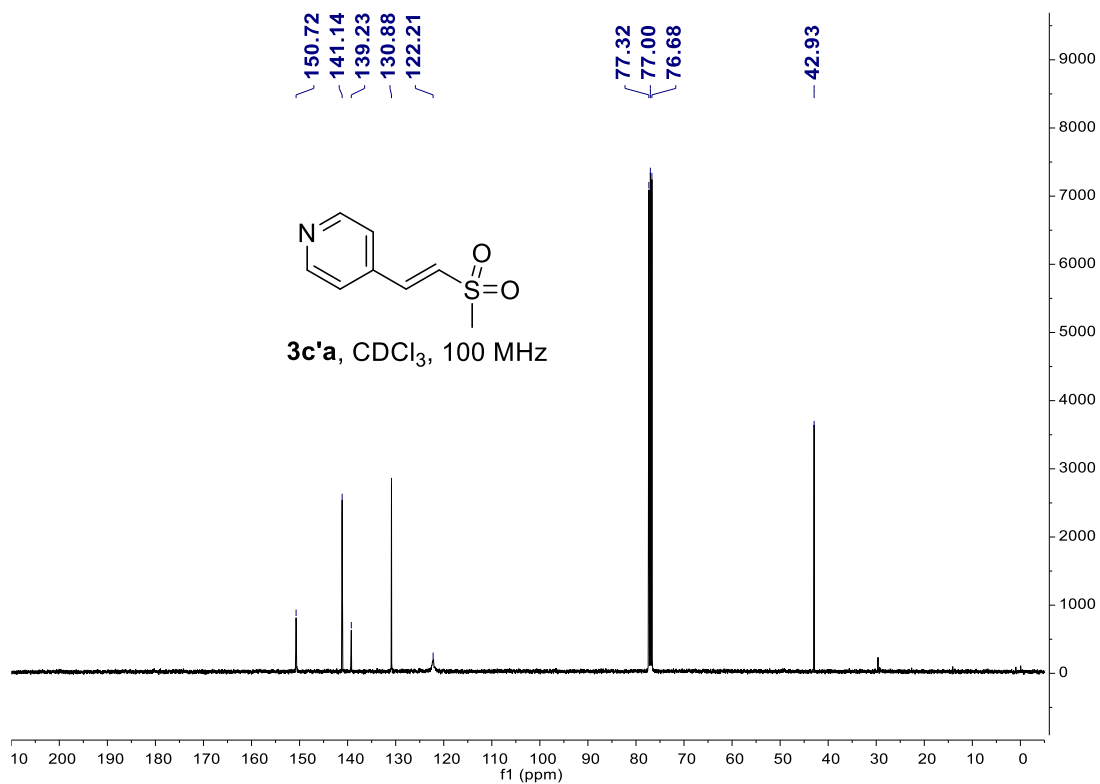

(E)-1-(4-(2-(methylsulfonyl)vinyl)phenyl)-1H-pyrazole (**3d'a**)

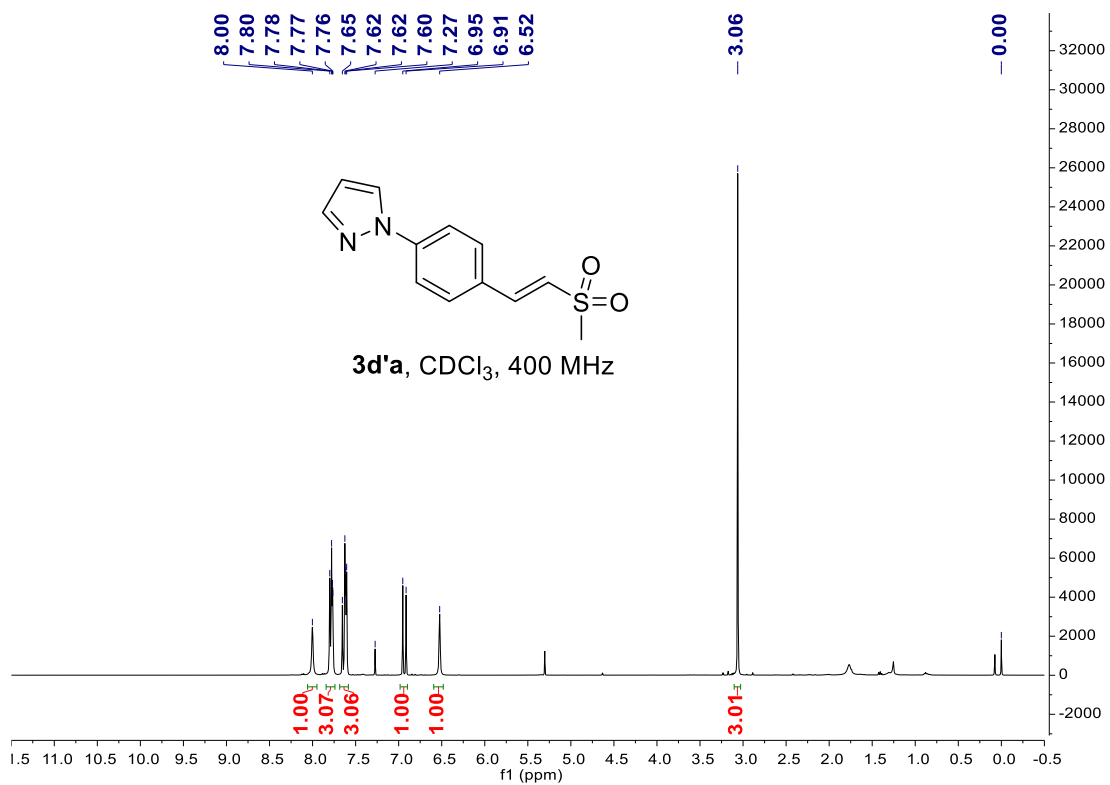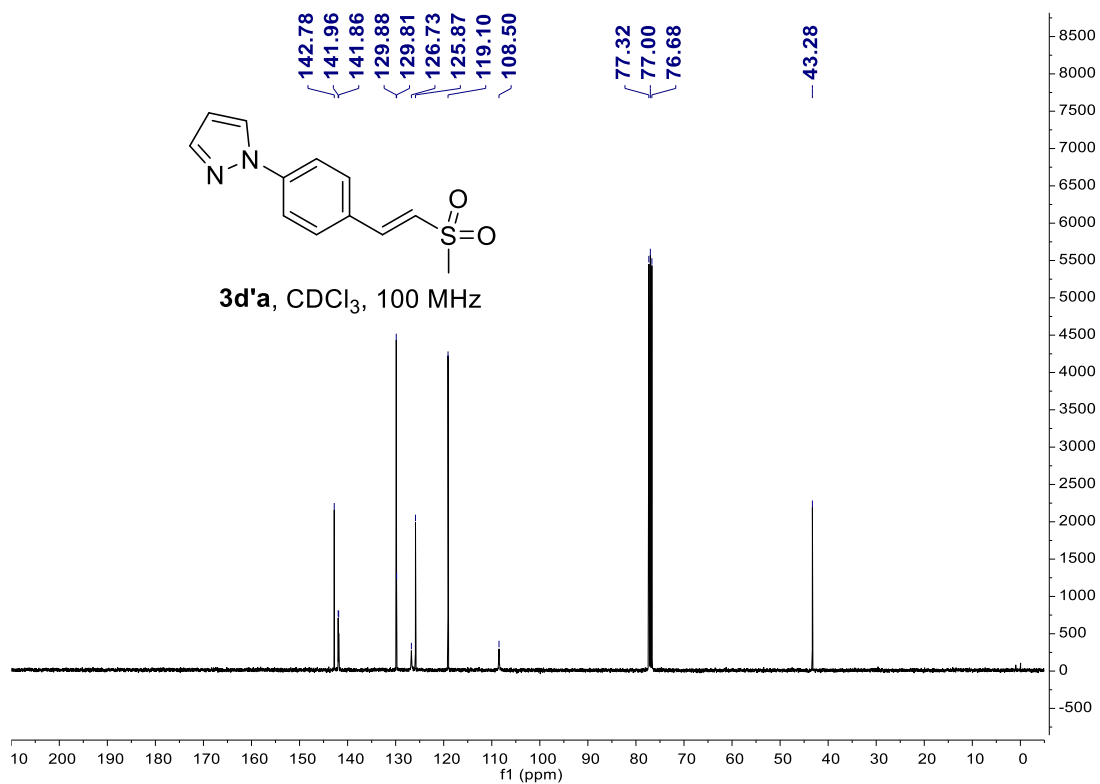

(2-(methylsulfonyl)ethene-1,1-diyl)dibenzene (**3e'a**)

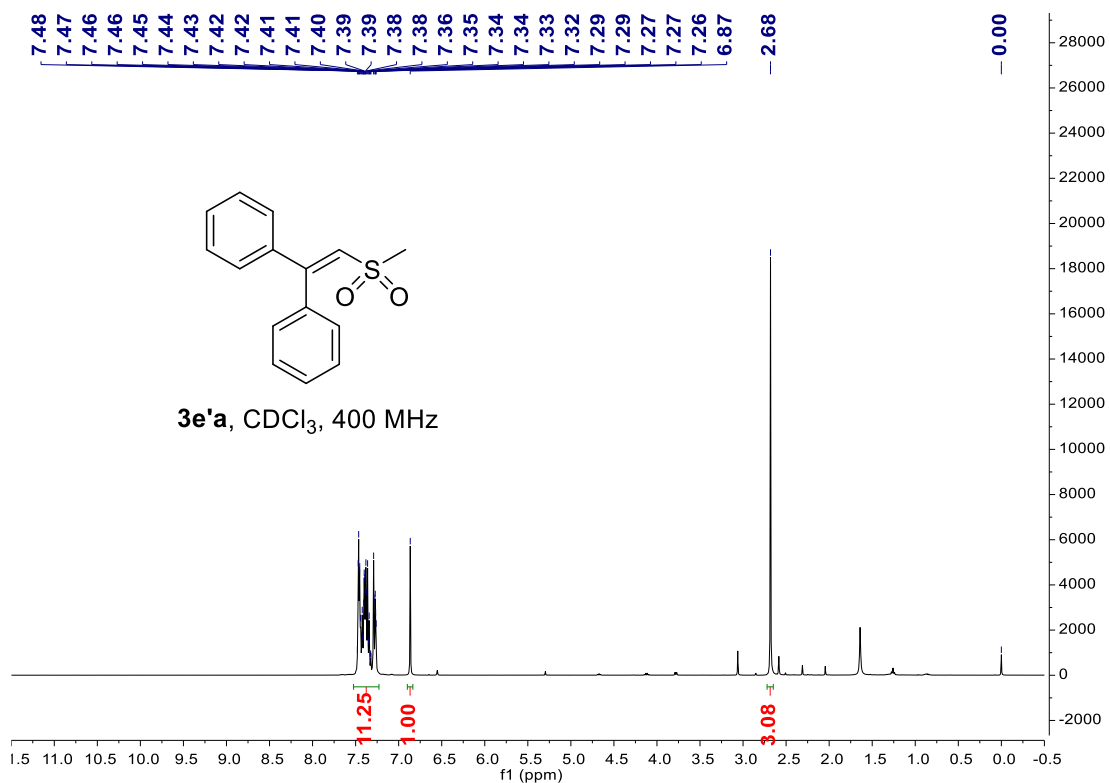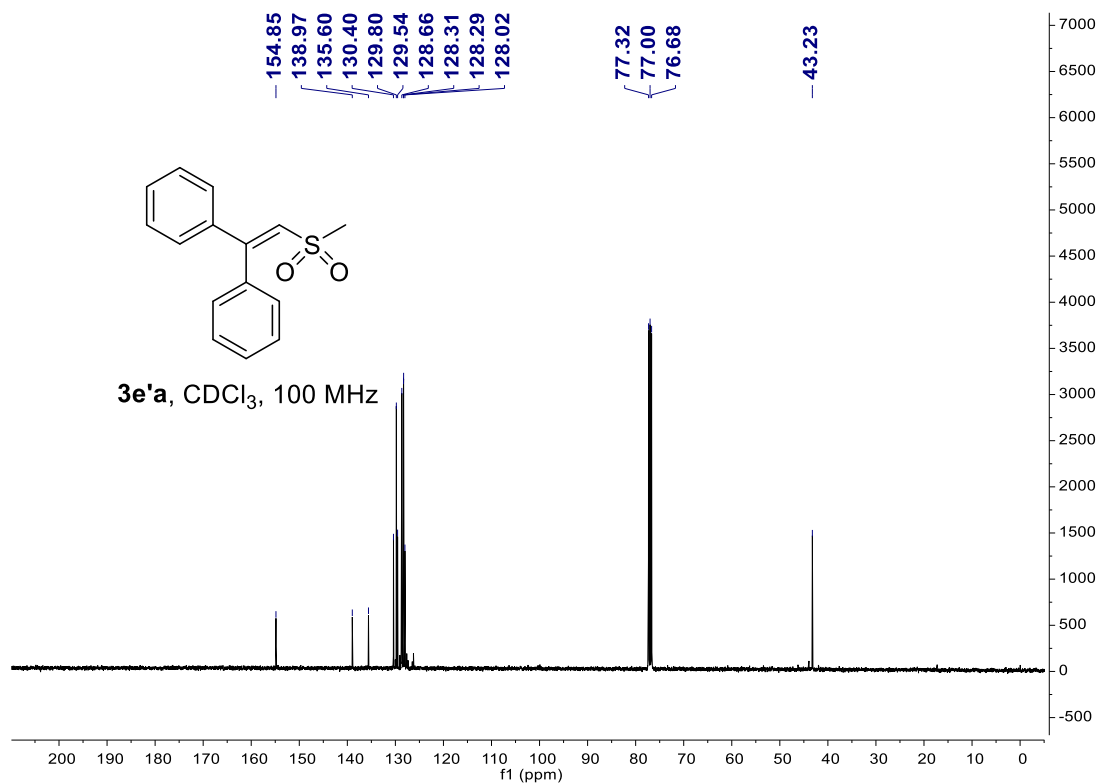

(3-(methylsulfonyl)prop-1-en-2-yl)benzene (**3f'a**)

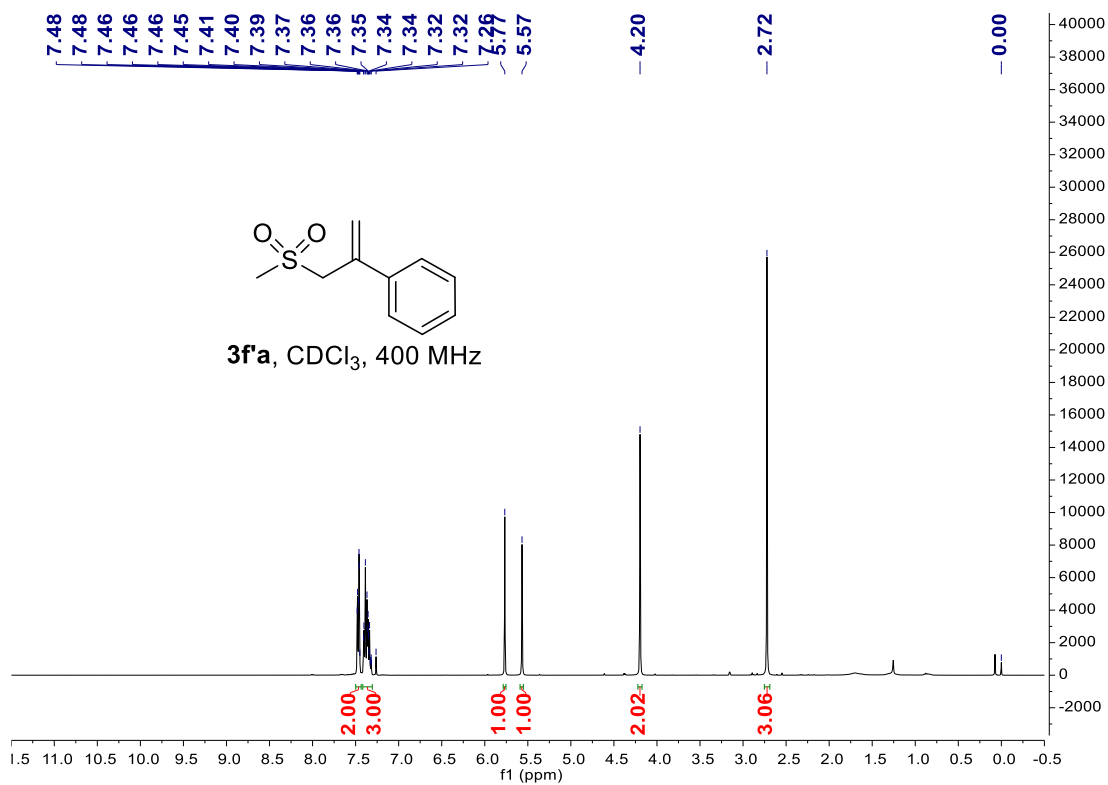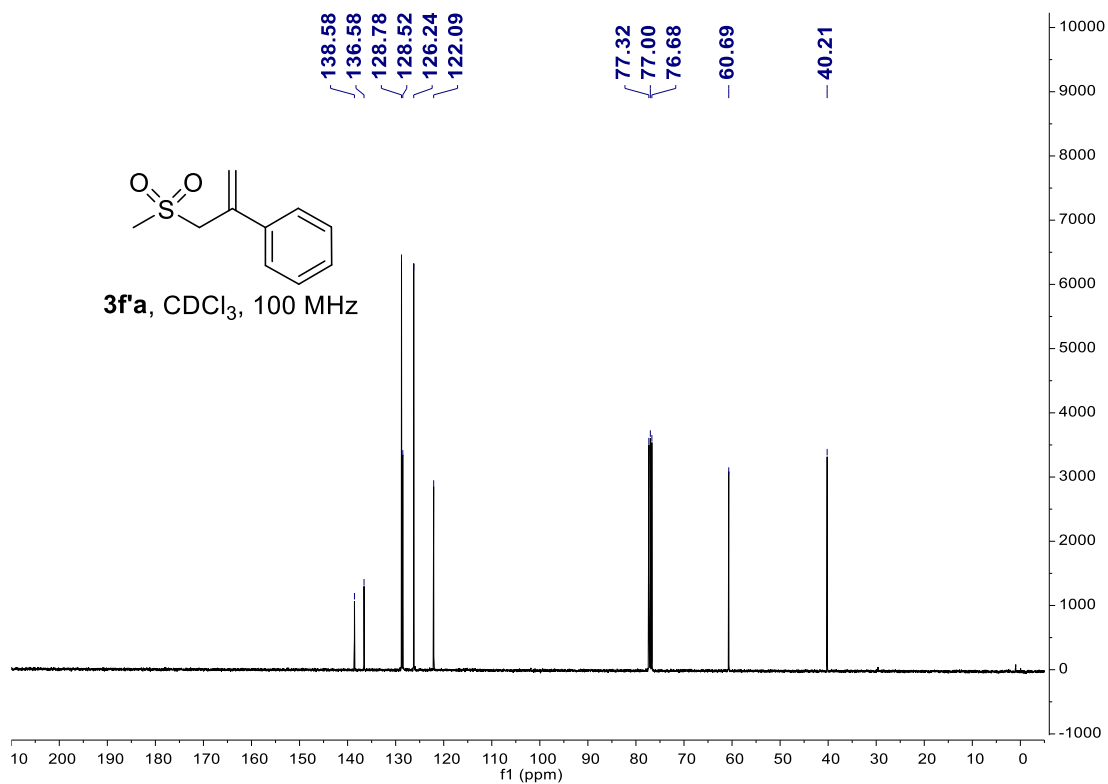

(E)-1-(2-(methylsulfonyl)vinyl)pyrrolidin-2-one (**3g'a**)

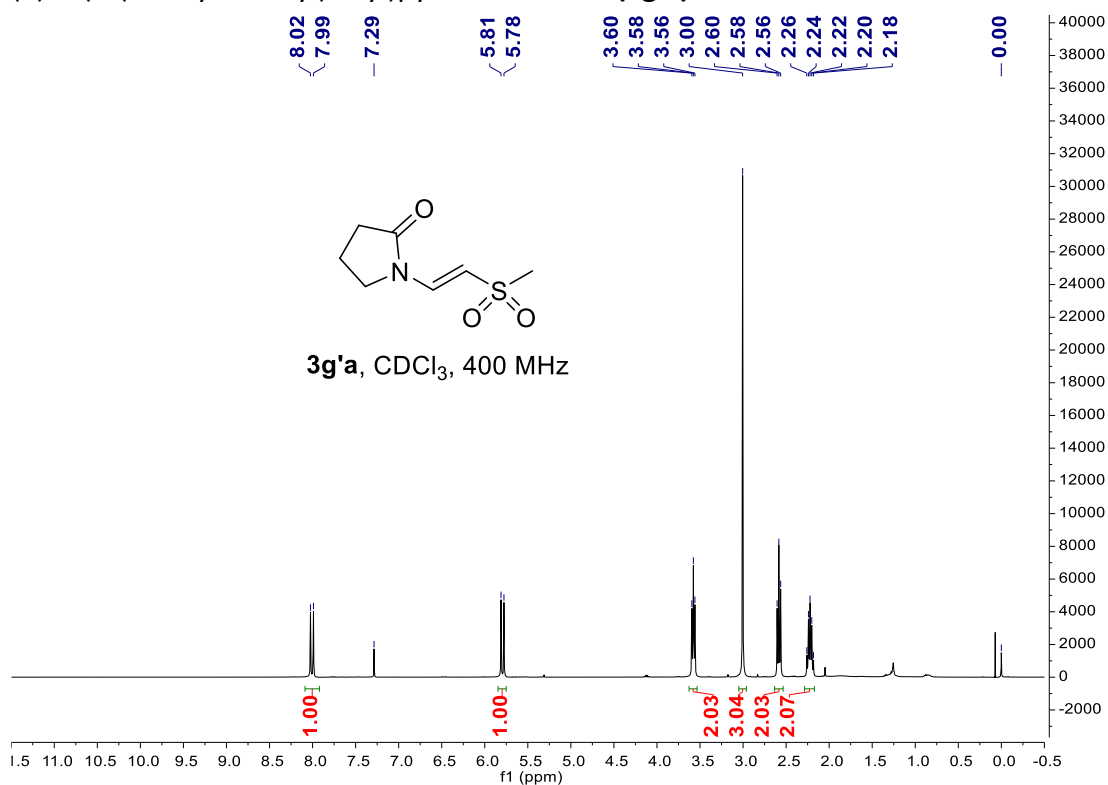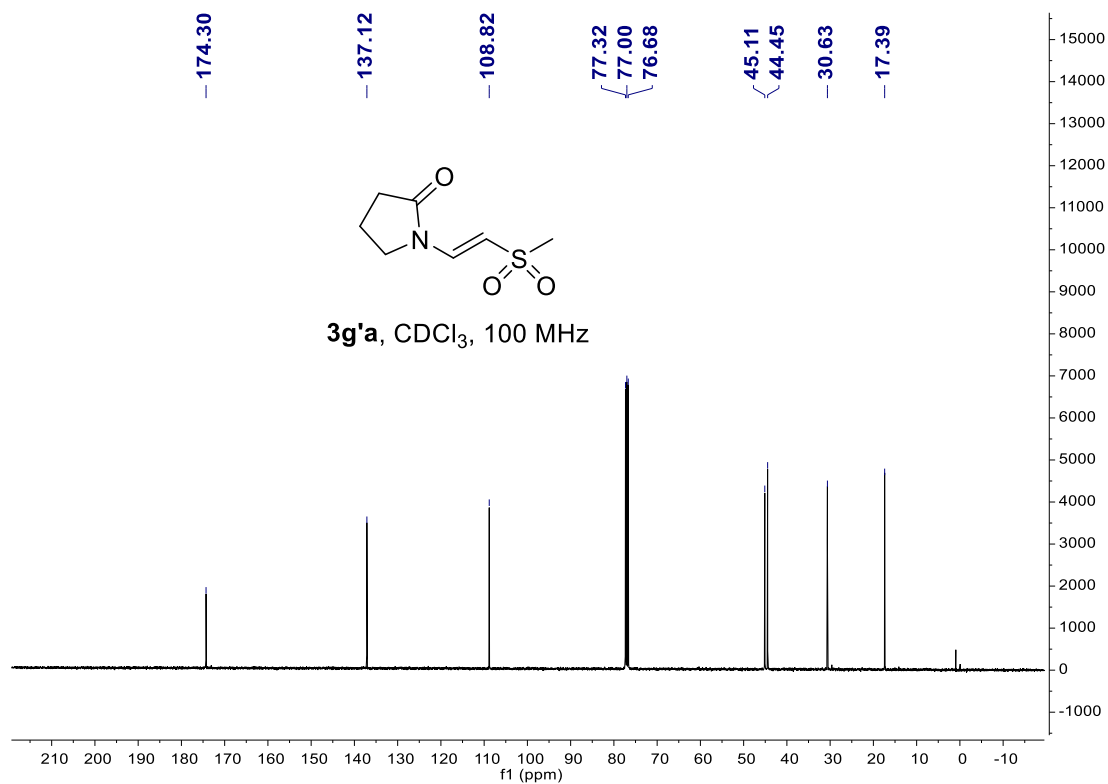

(E)-N-benzyl-N-(1-(4-fluorophenyl)-2-(methylsulfonyl)vinyl)acetamide (**3h'a**)

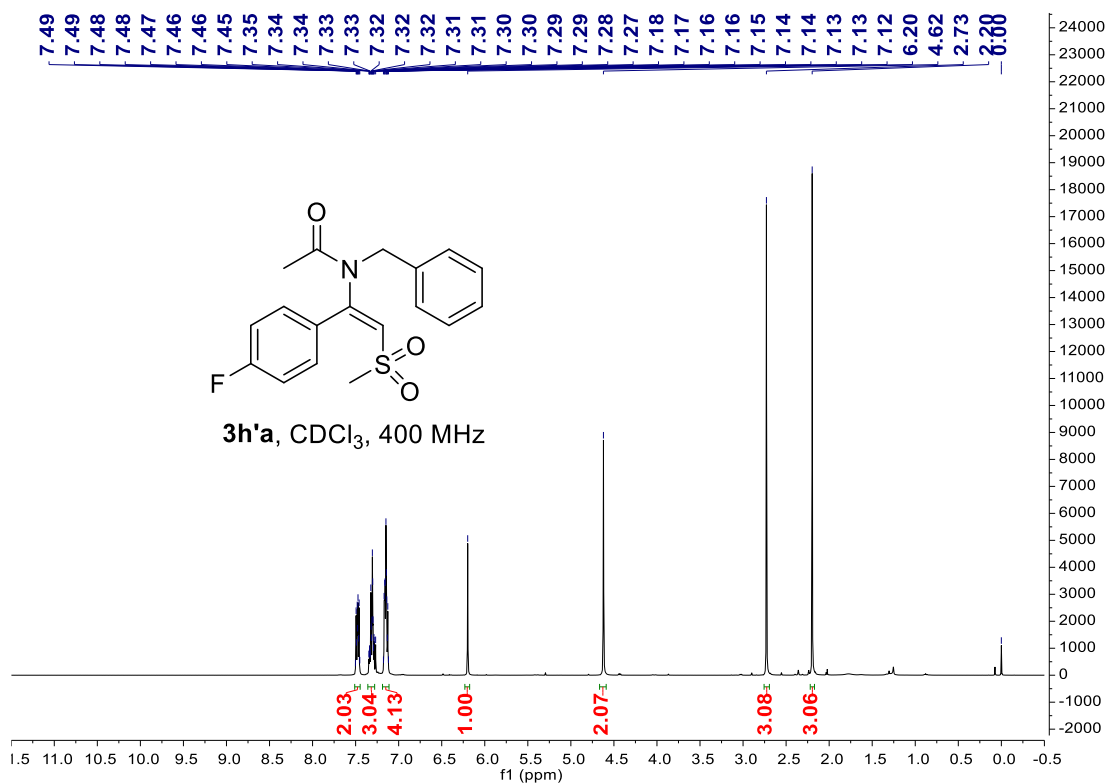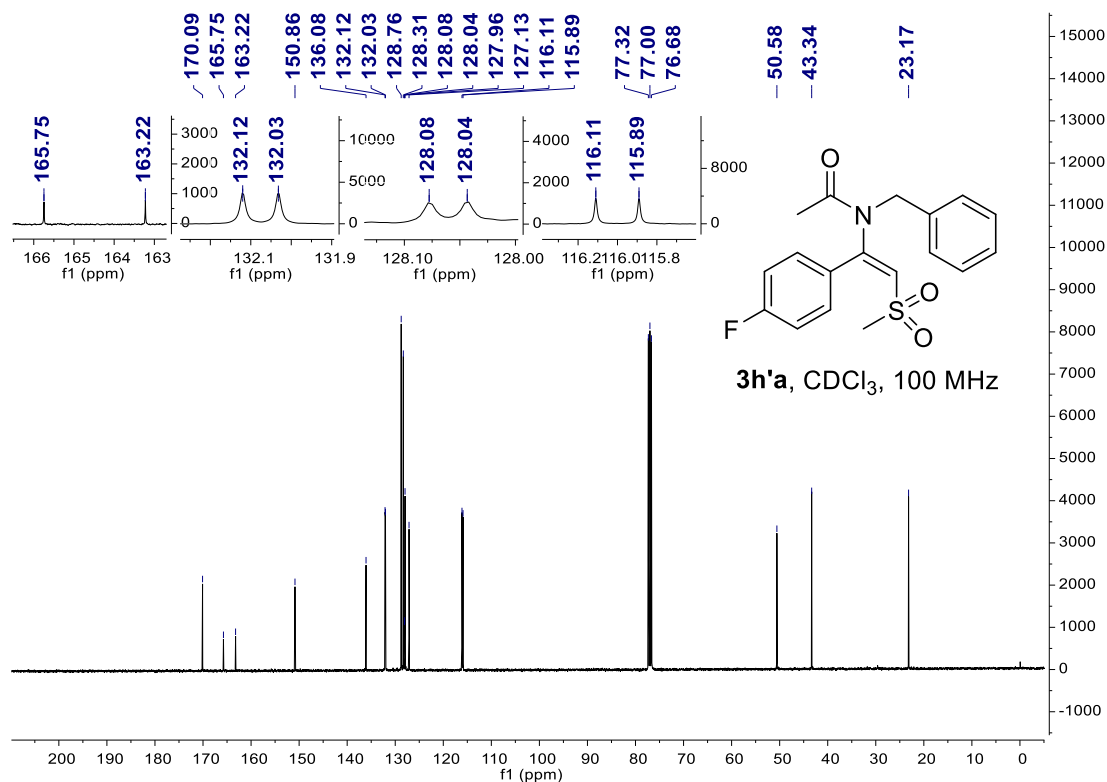



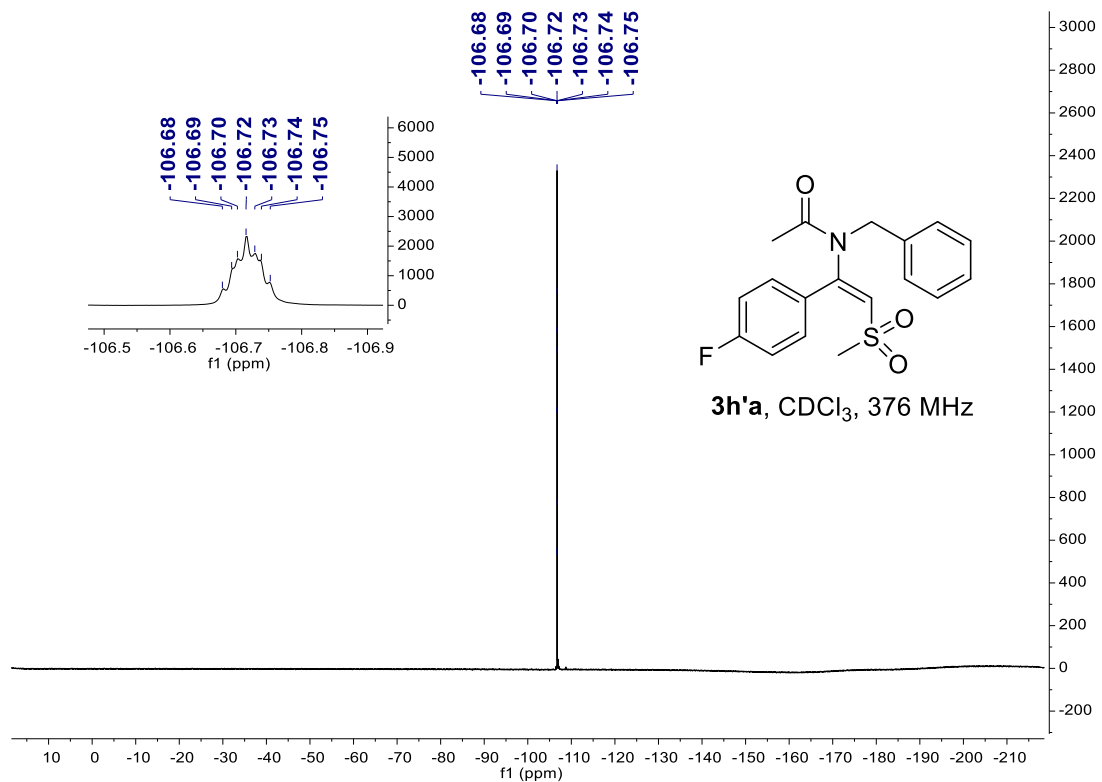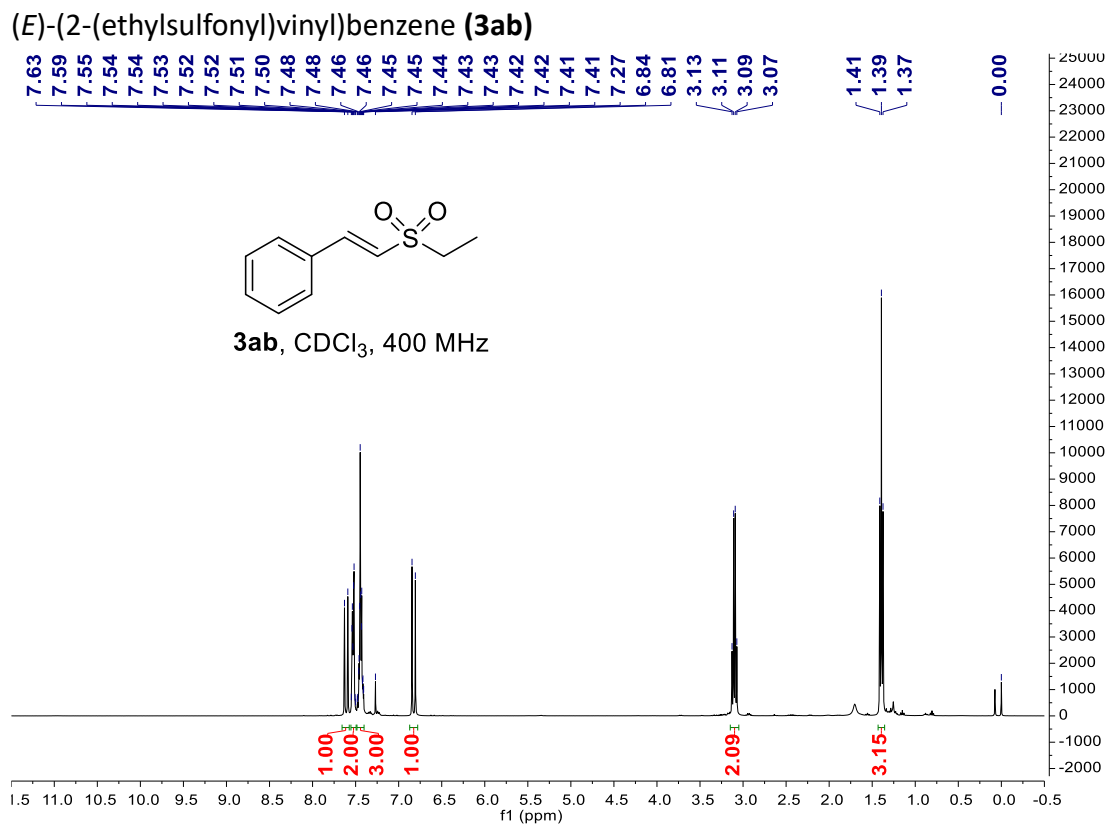

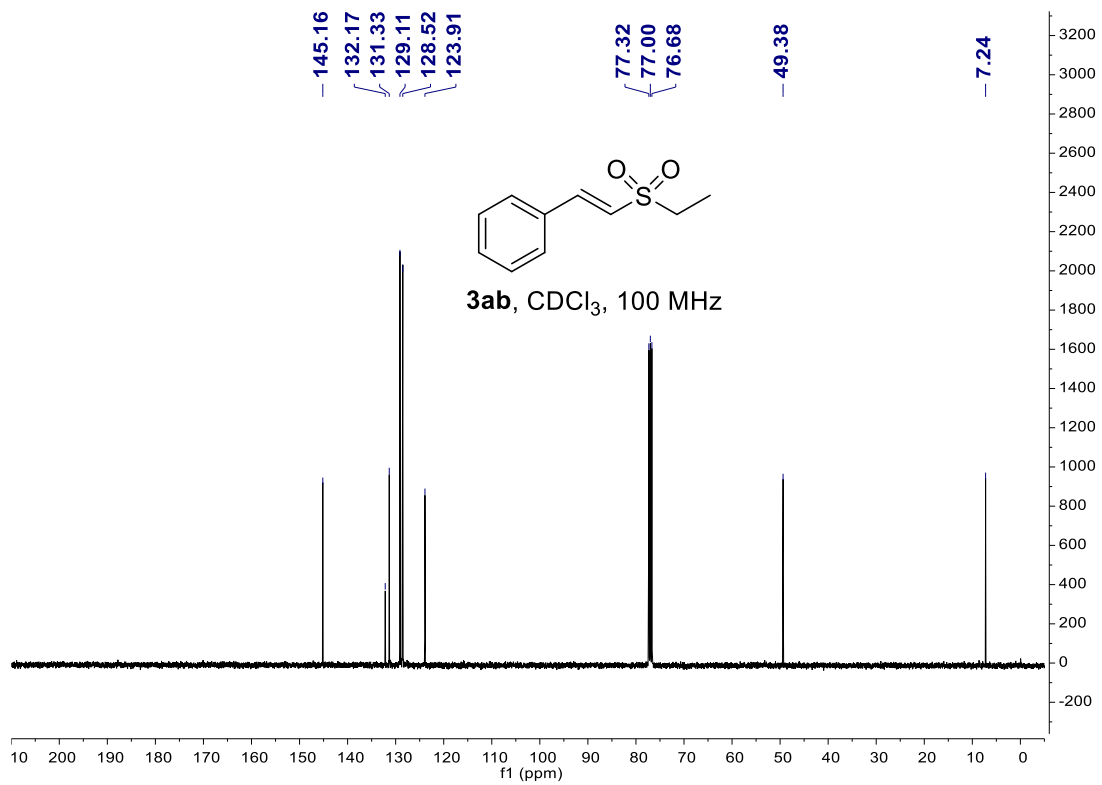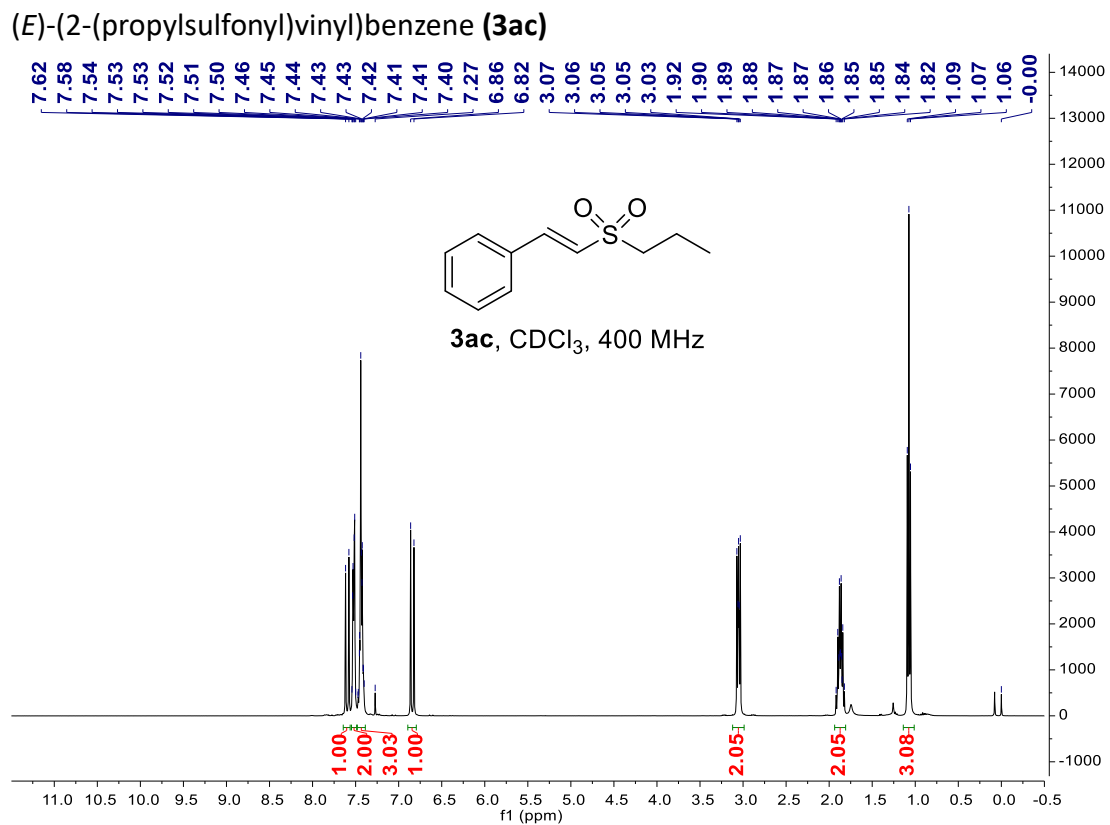

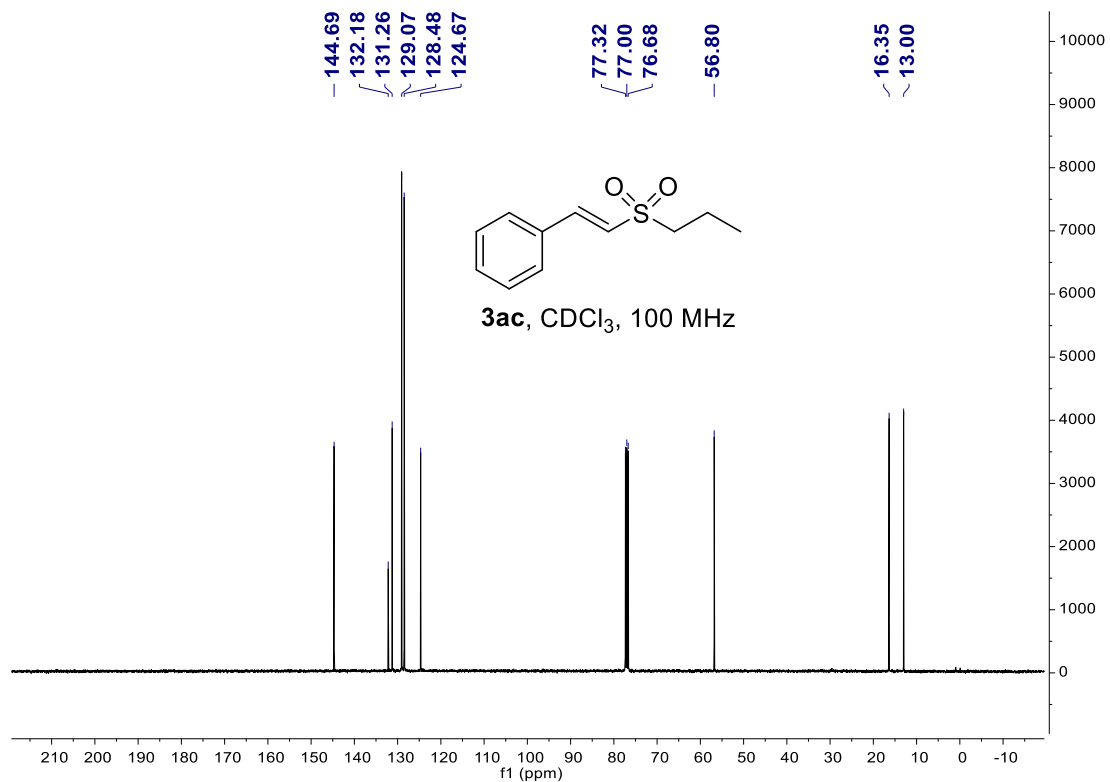

**(E)-2-(propylsulfonyl)vinyl)benzene (3ad)**

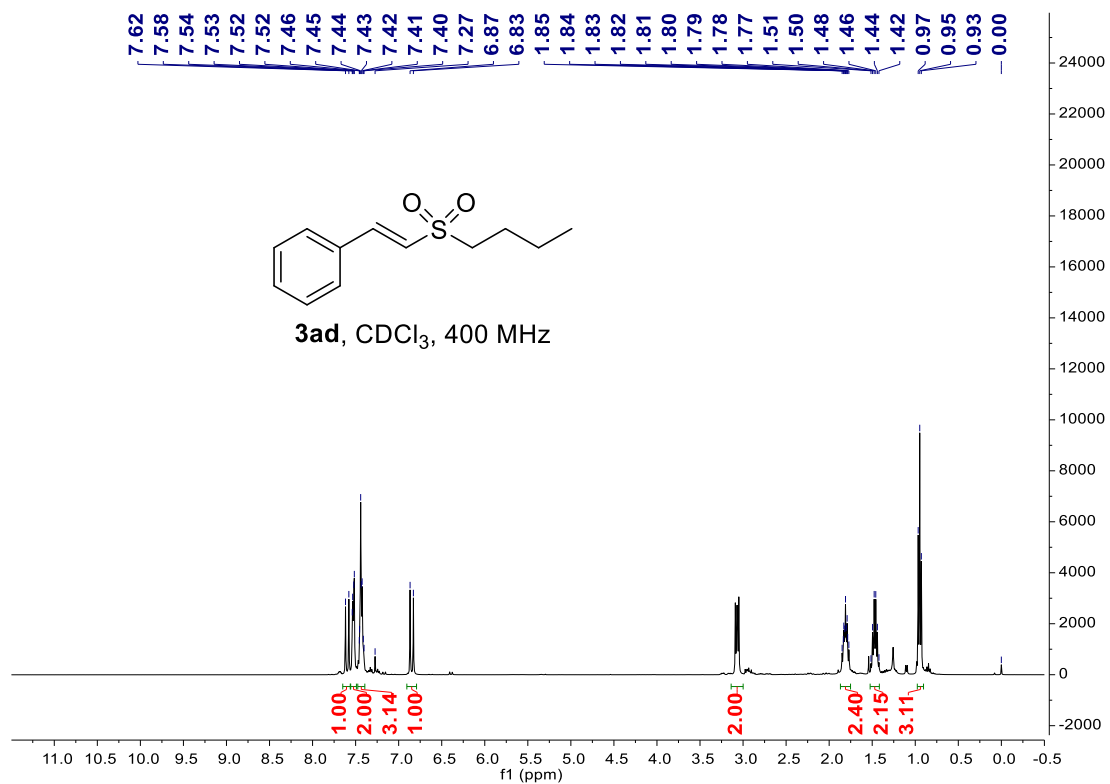

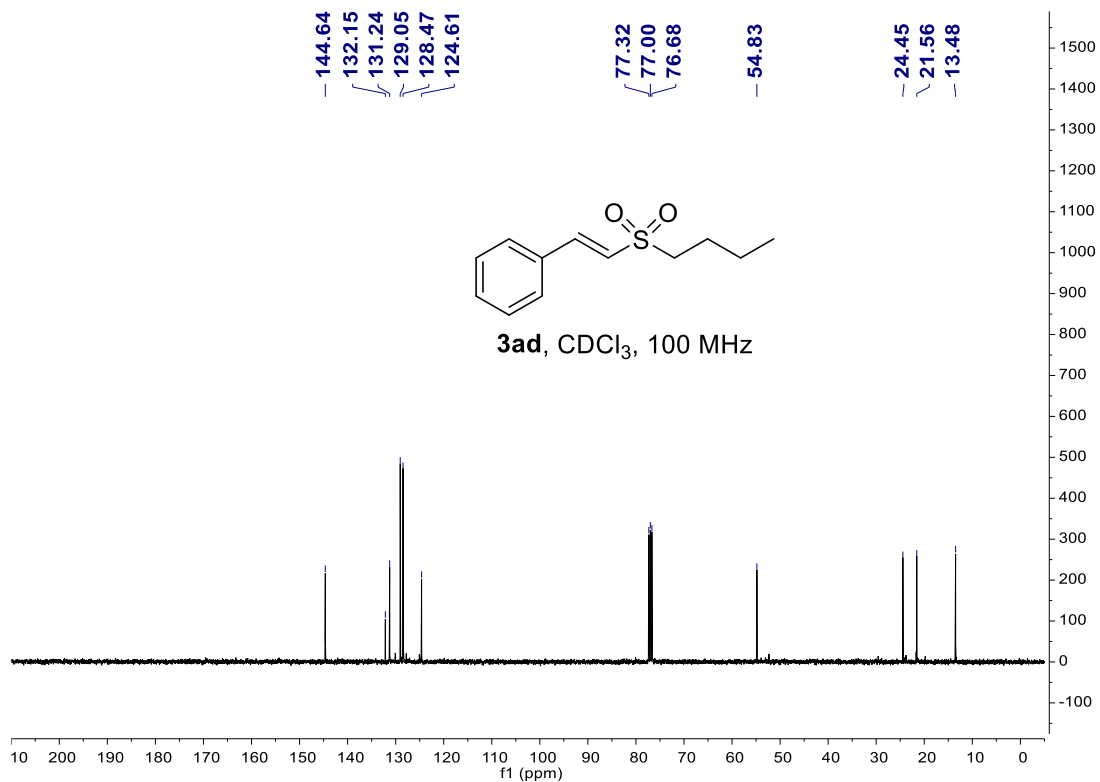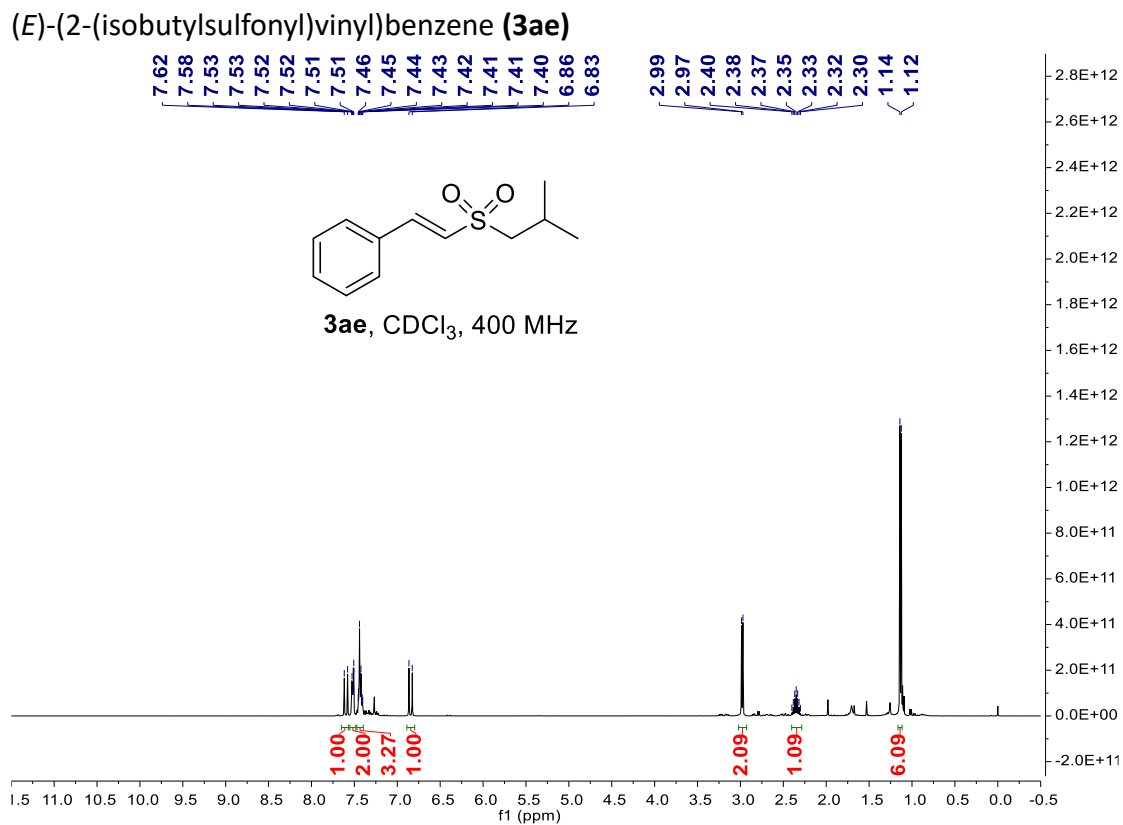

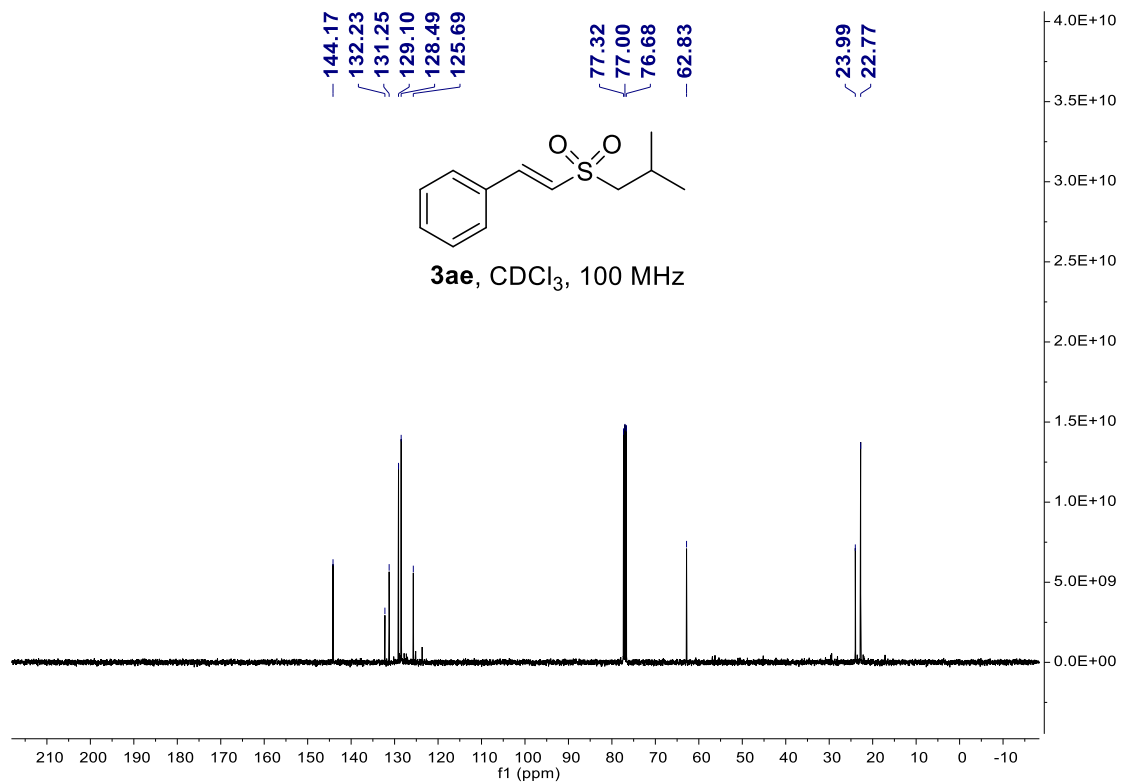

**(E)-2-(isopropylsulfonyl)vinylbenzene (3af)**

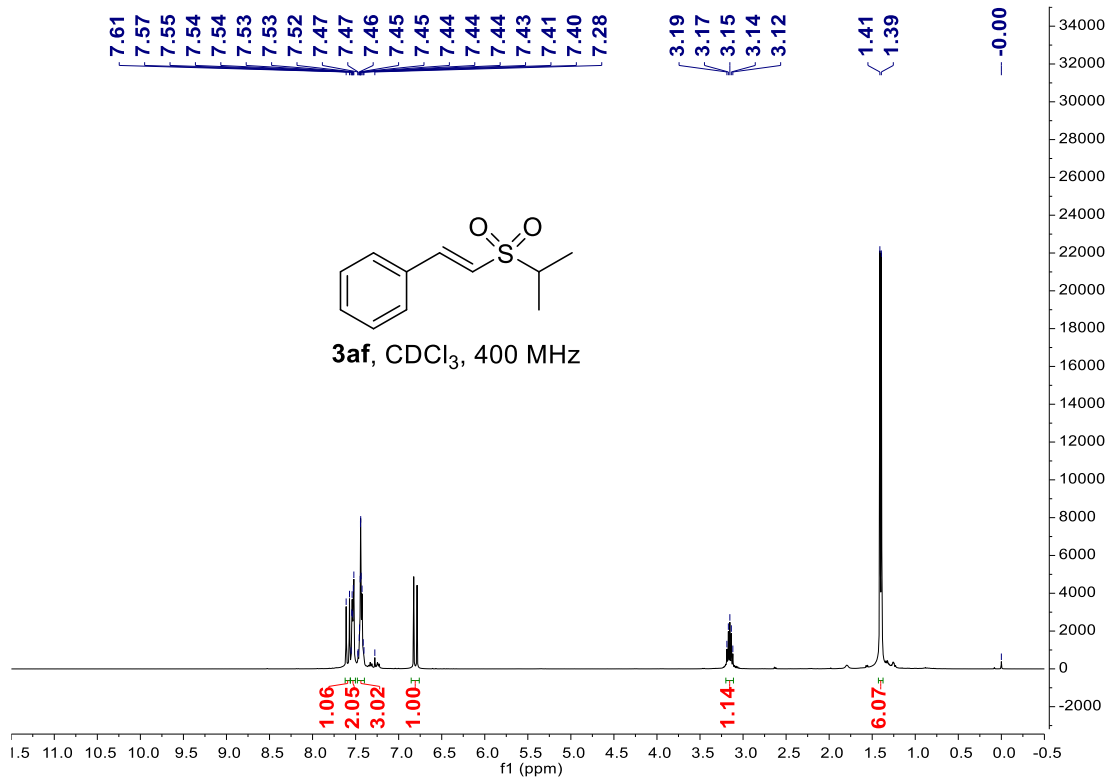

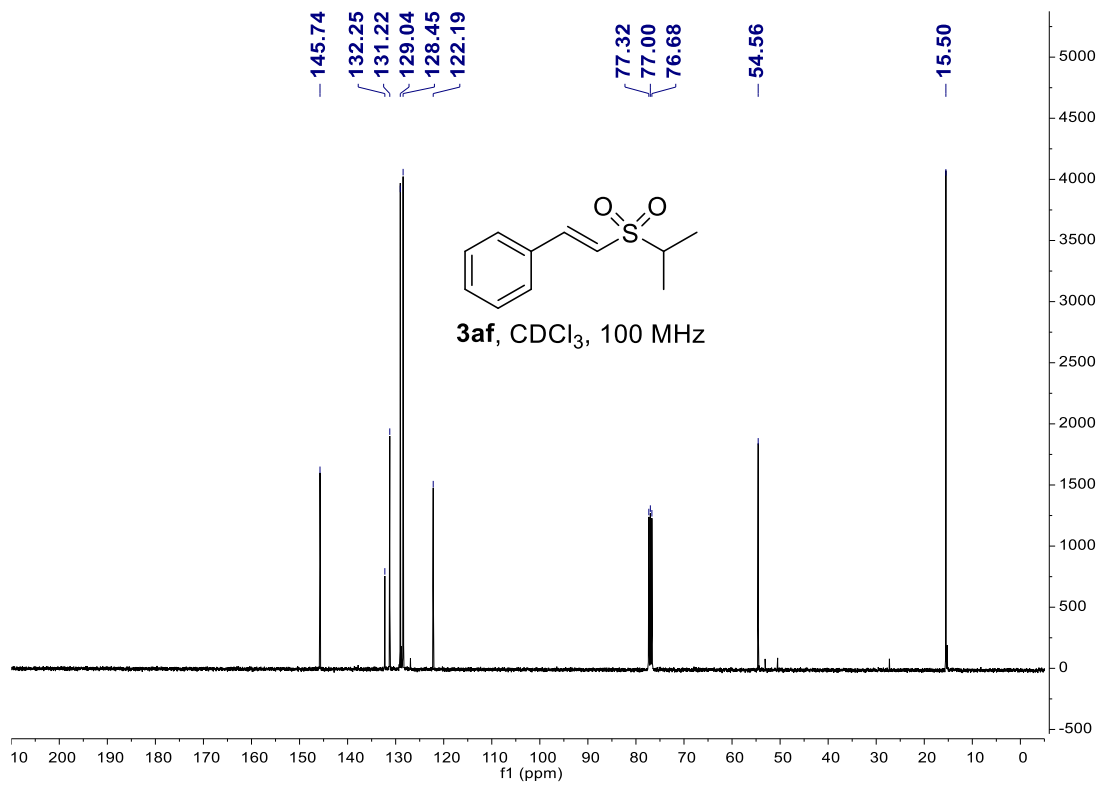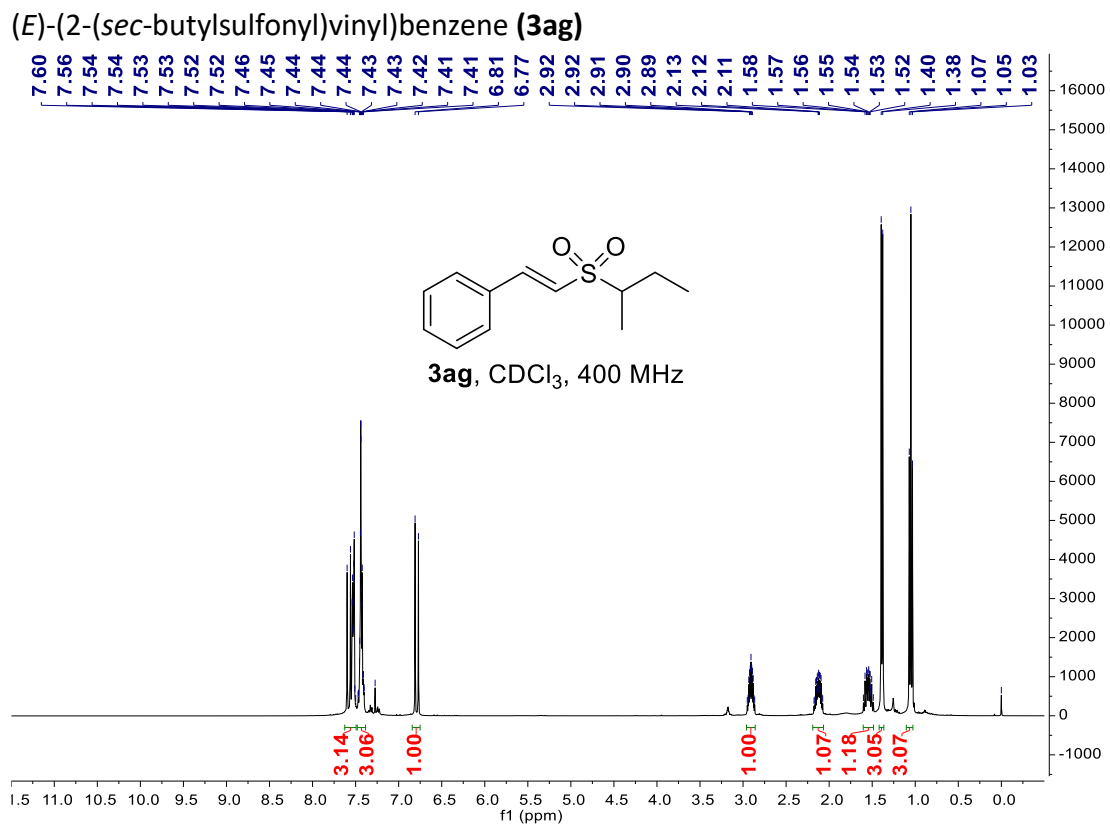

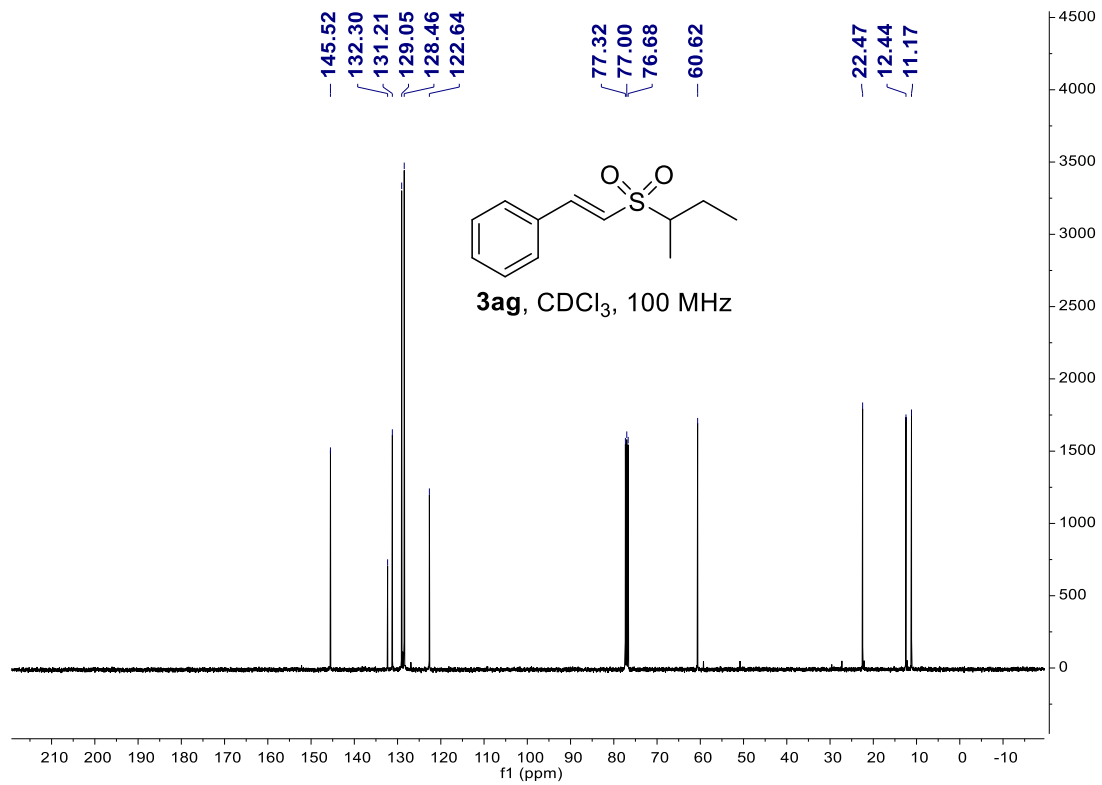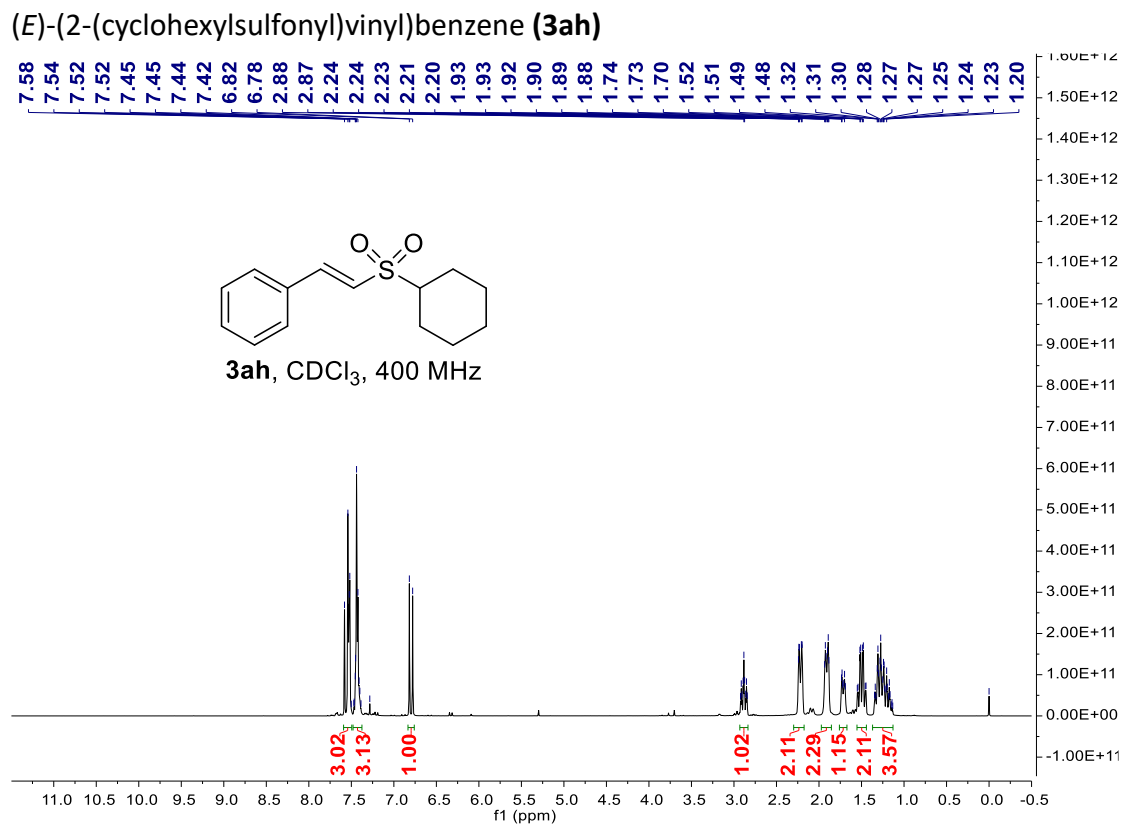

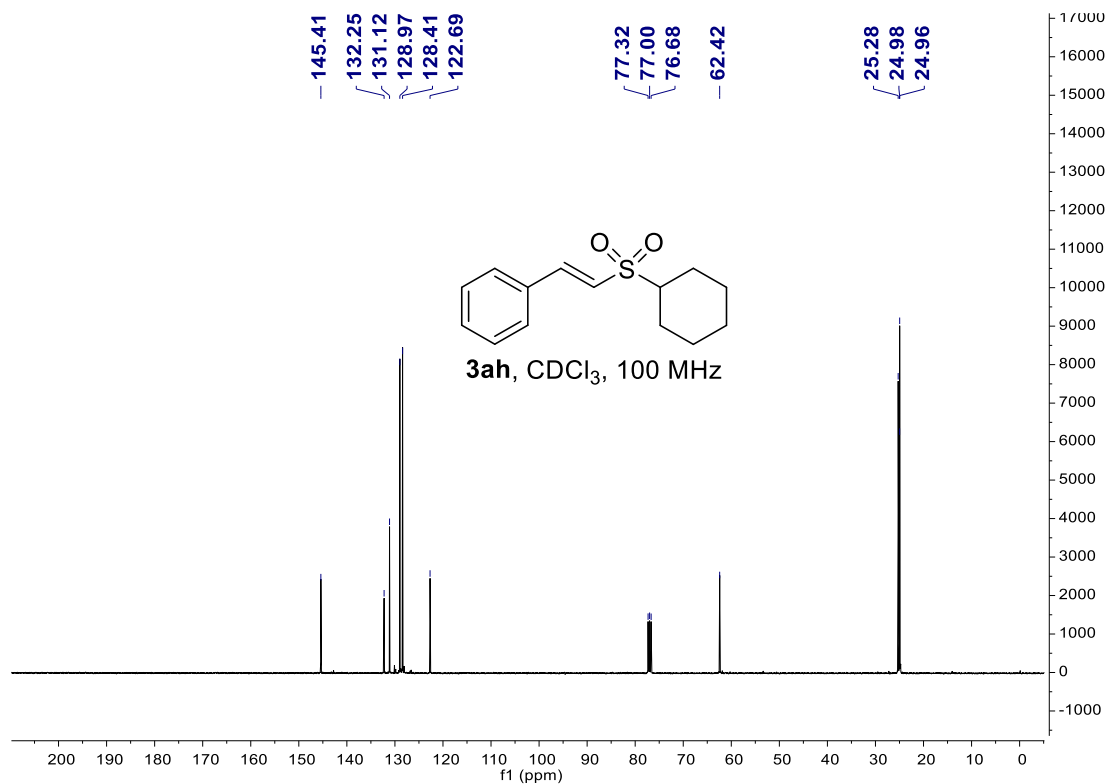

(E)-2-(cyclopentylsulfonyl)vinyl)benzene (**3ai**)

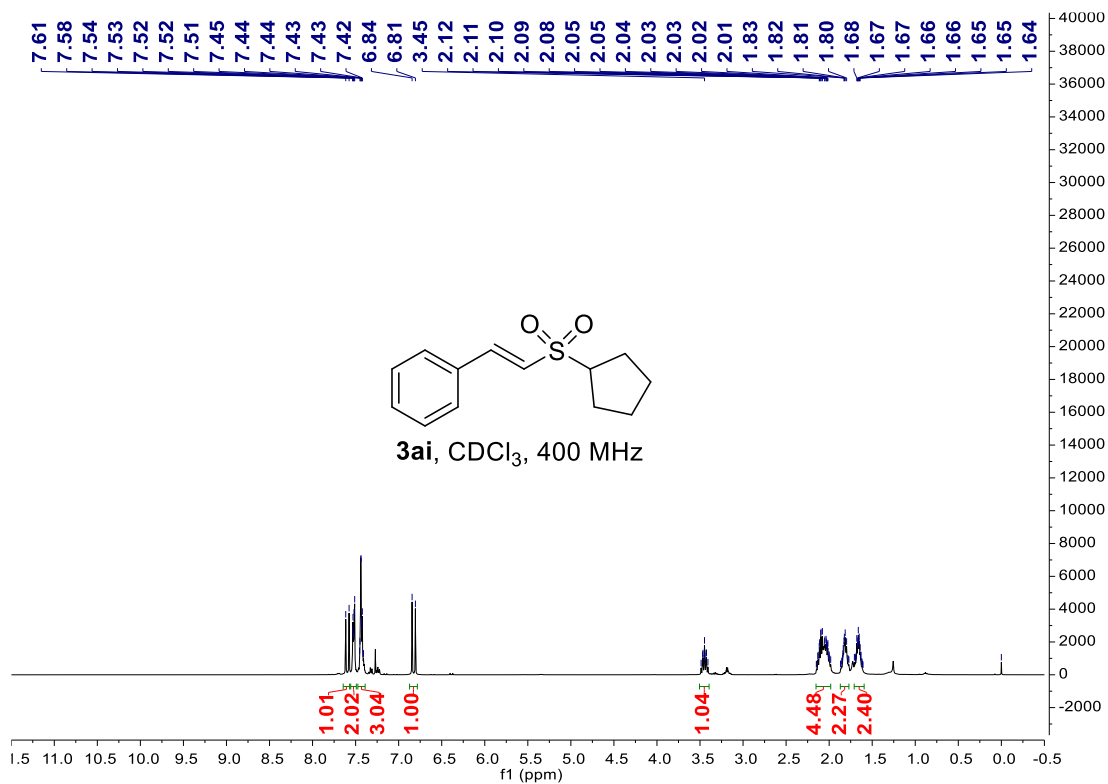



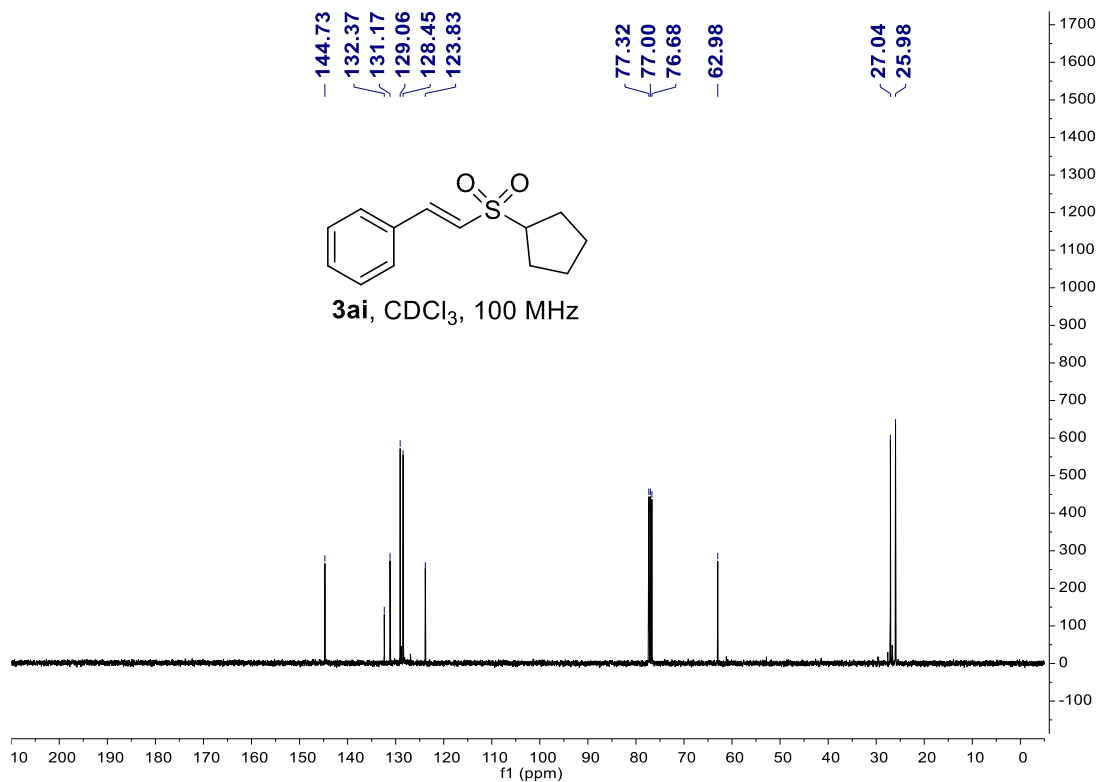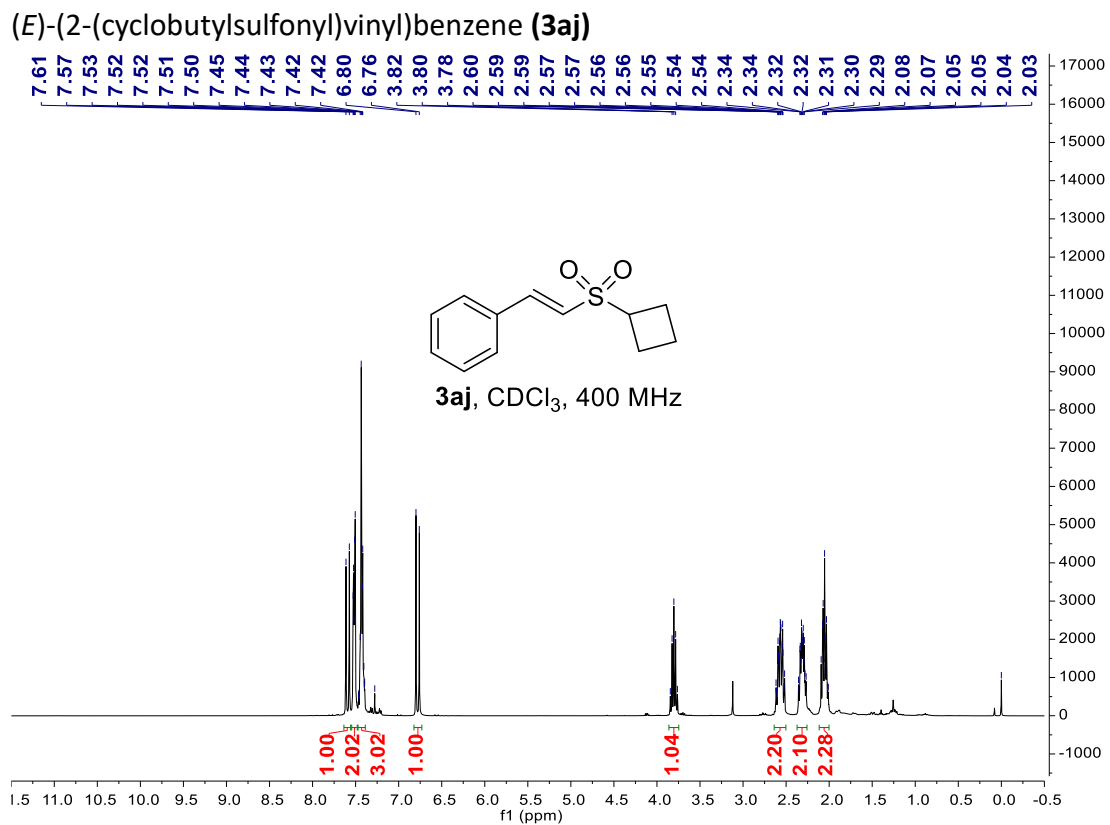

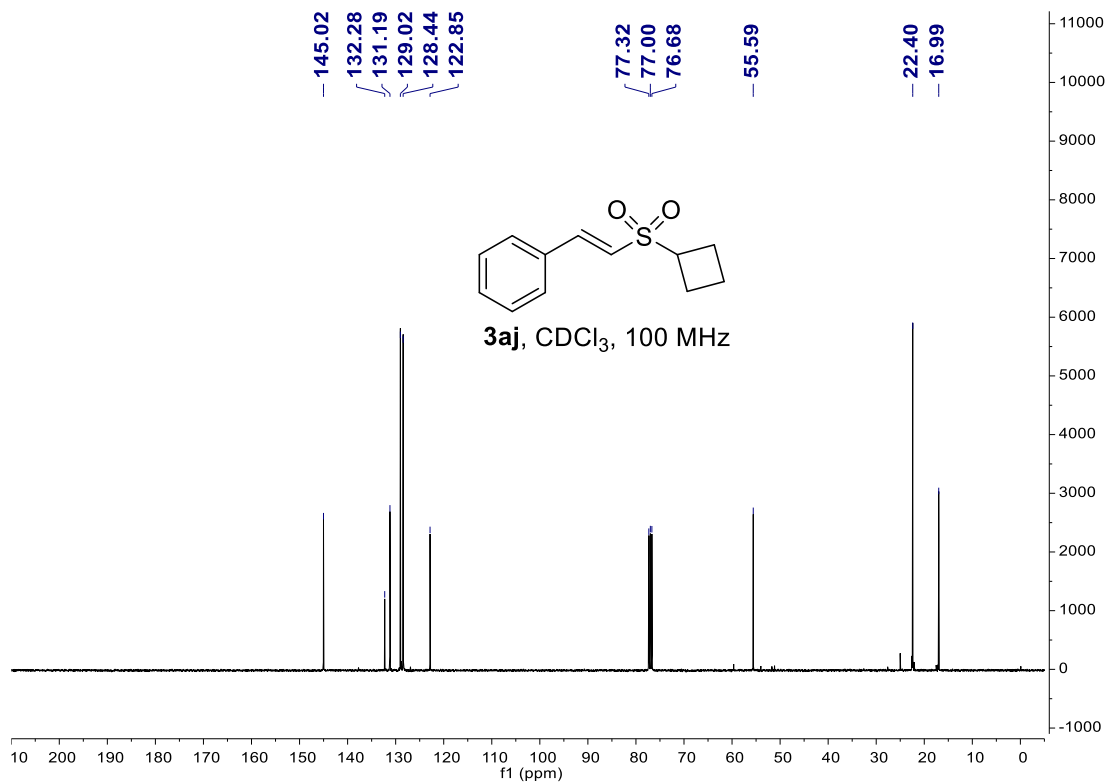

(E)-1-phenyl-6-(styrylsulfonyl)hexan-1-one (3al)

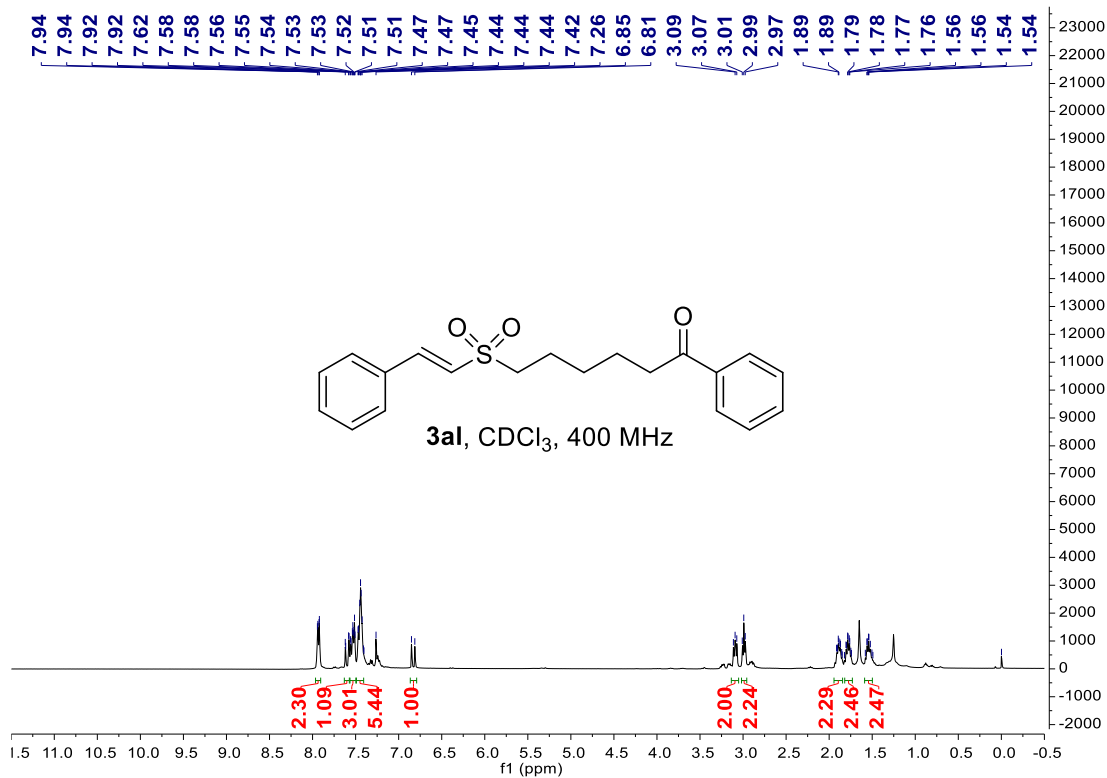

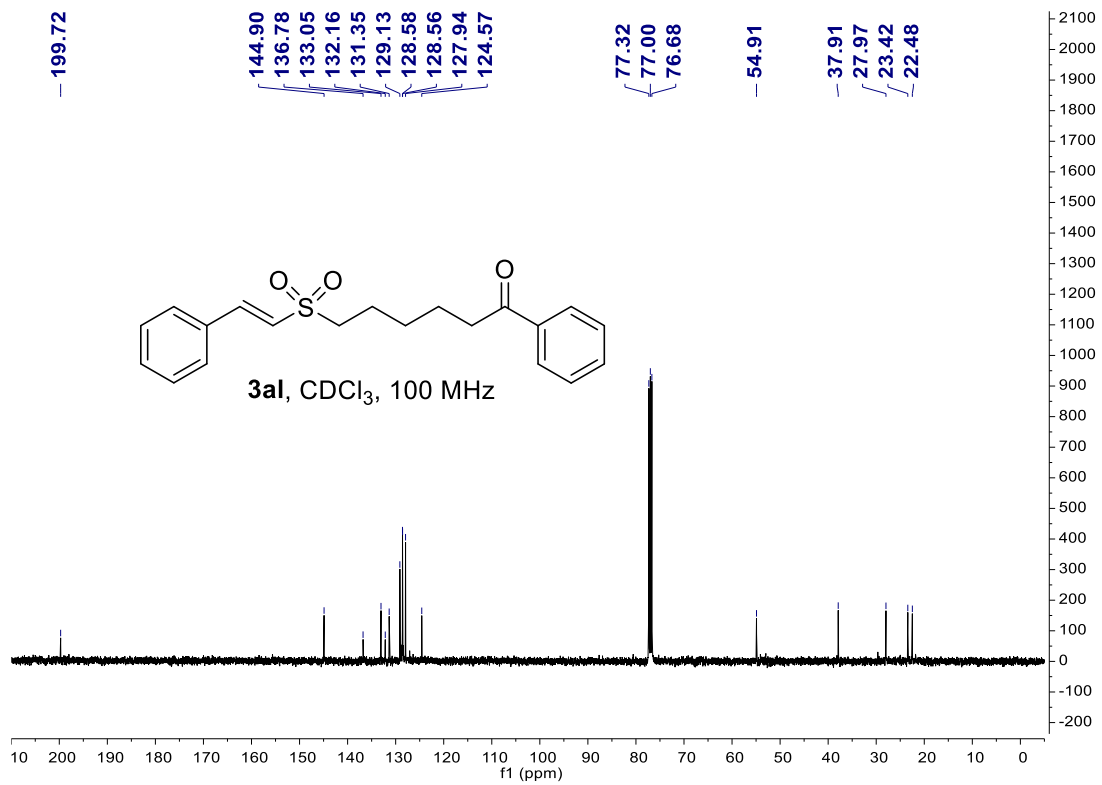

**(E)-1-phenyl-12-(styrylsulfonyl)dodecan-1-one (3am)**

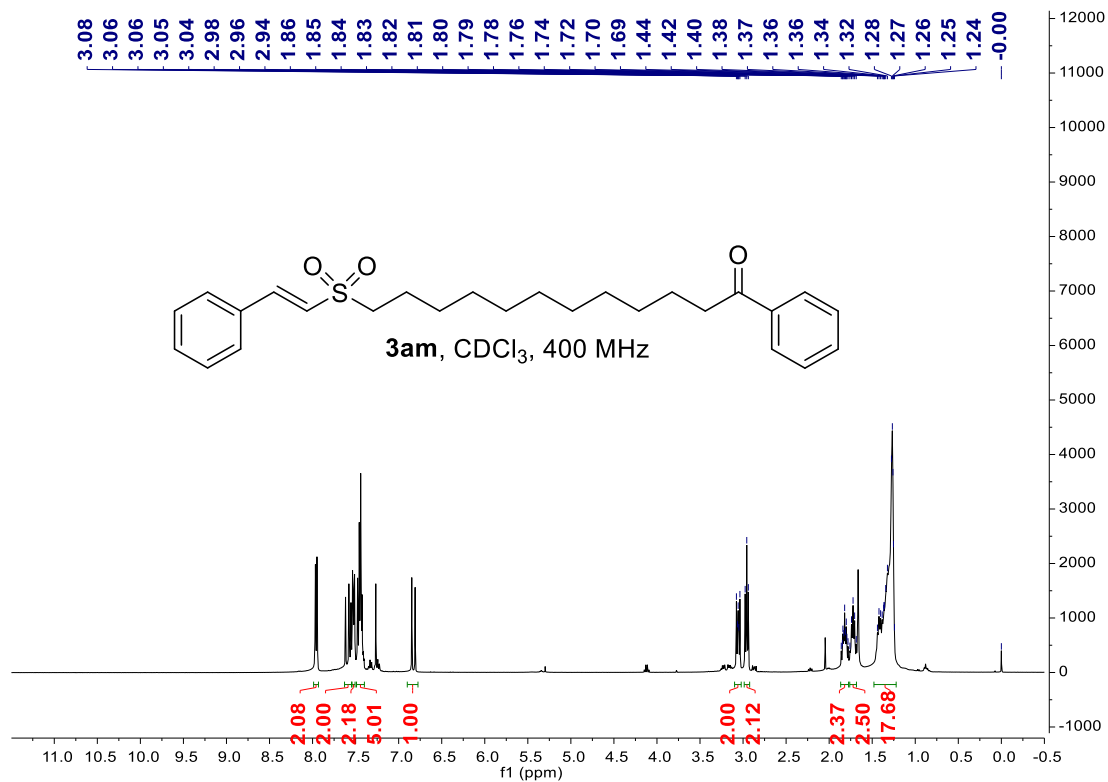

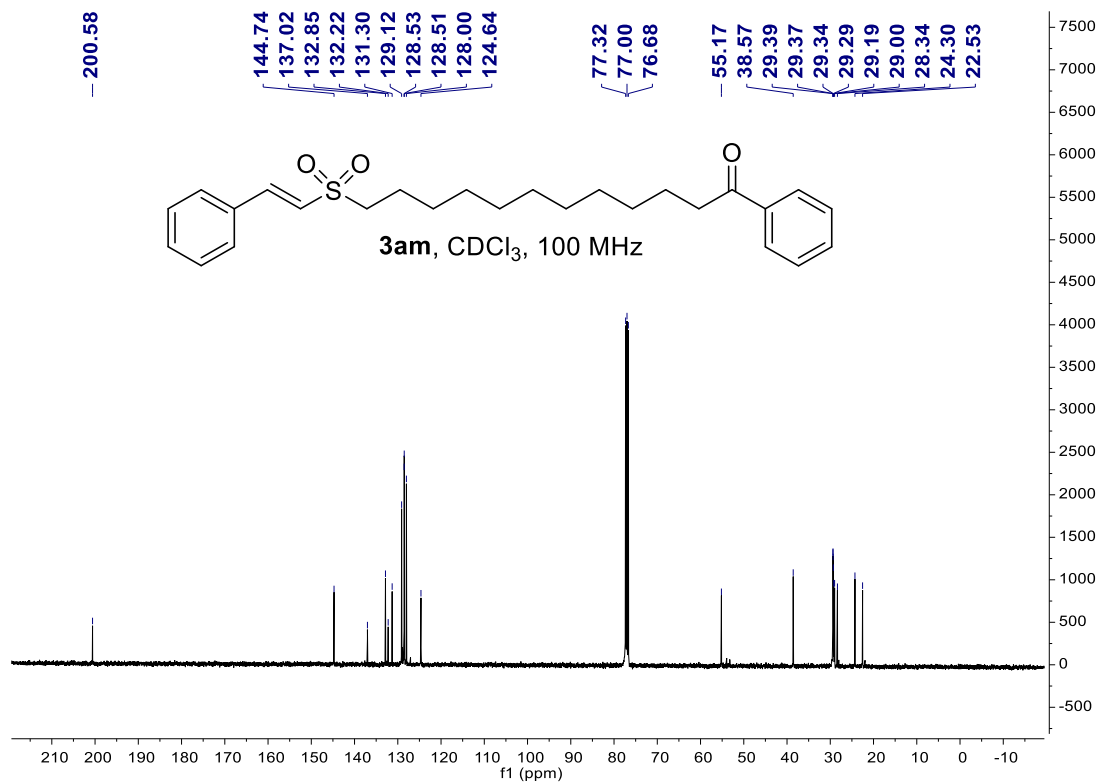

(1*R*,2*S*,5*R*)-2-isopropyl-5-methylcyclohexyl 4-((*E*)-2-(methylsulfonyl)vinyl)benzoate  
**(3n'a)**

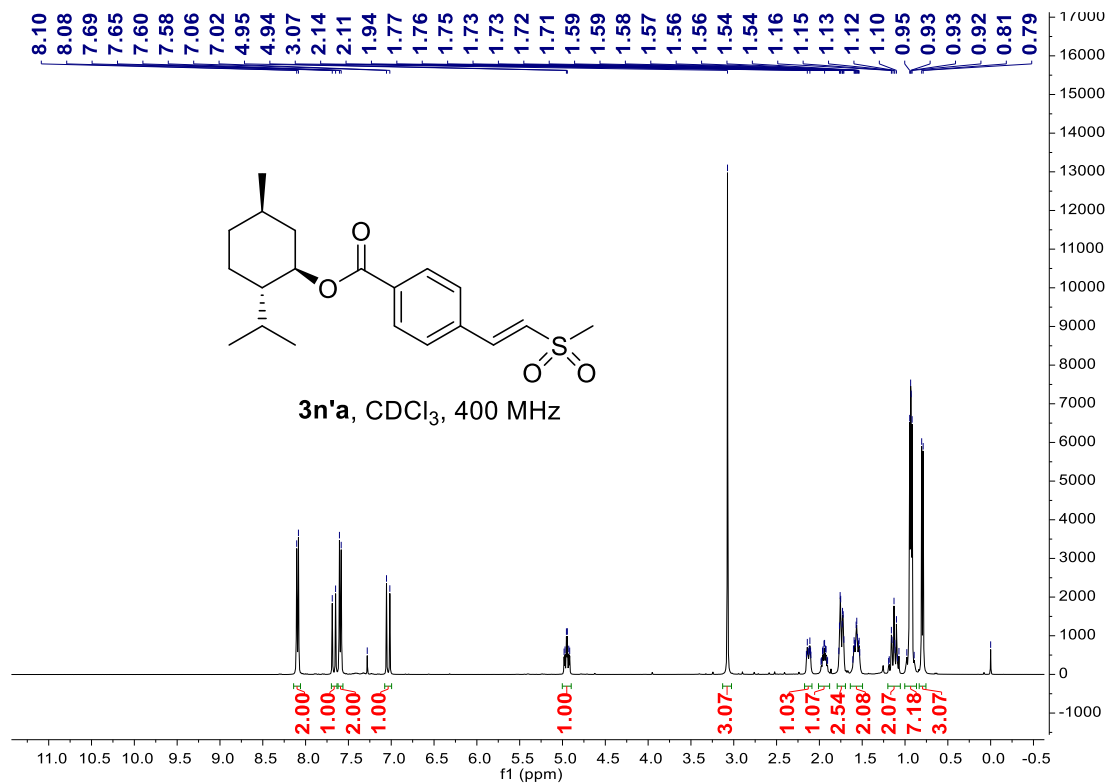

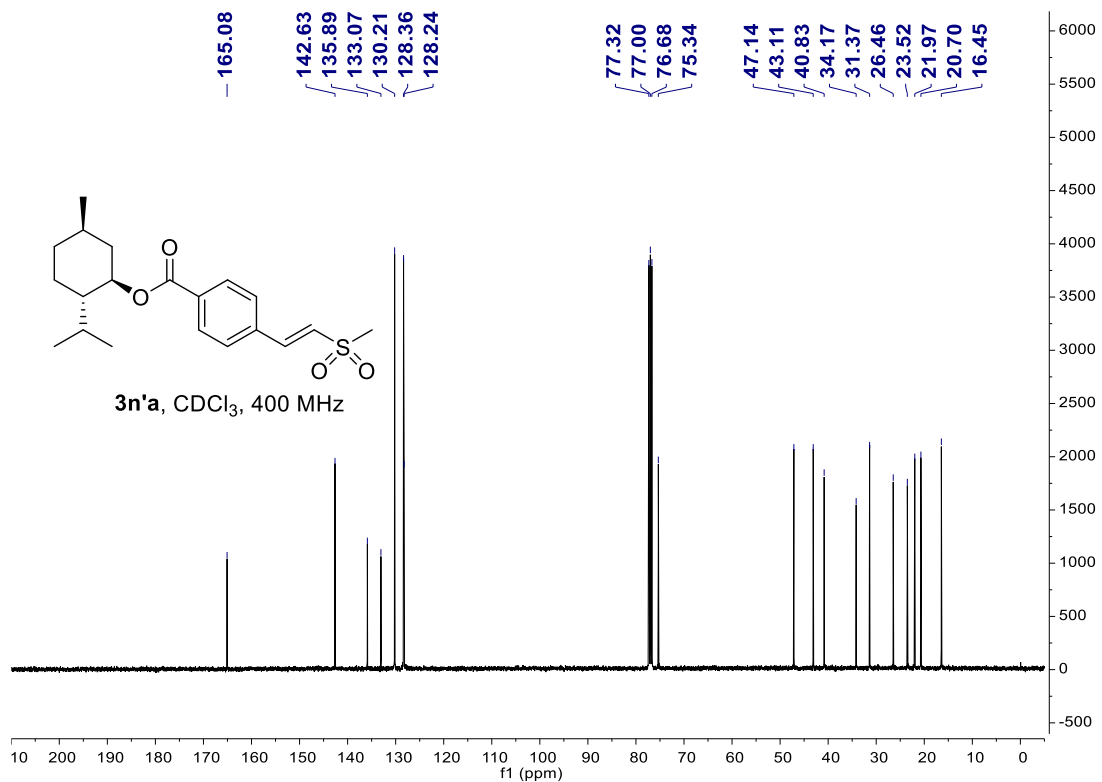

(1*S*,2*R*,4*S*)-1,7,7-trimethylbicyclo[2.2.1]heptan-2-yl 4-((*E*)-2-(methylsulfonyl)vinyl)benzoate (**3o'a**)

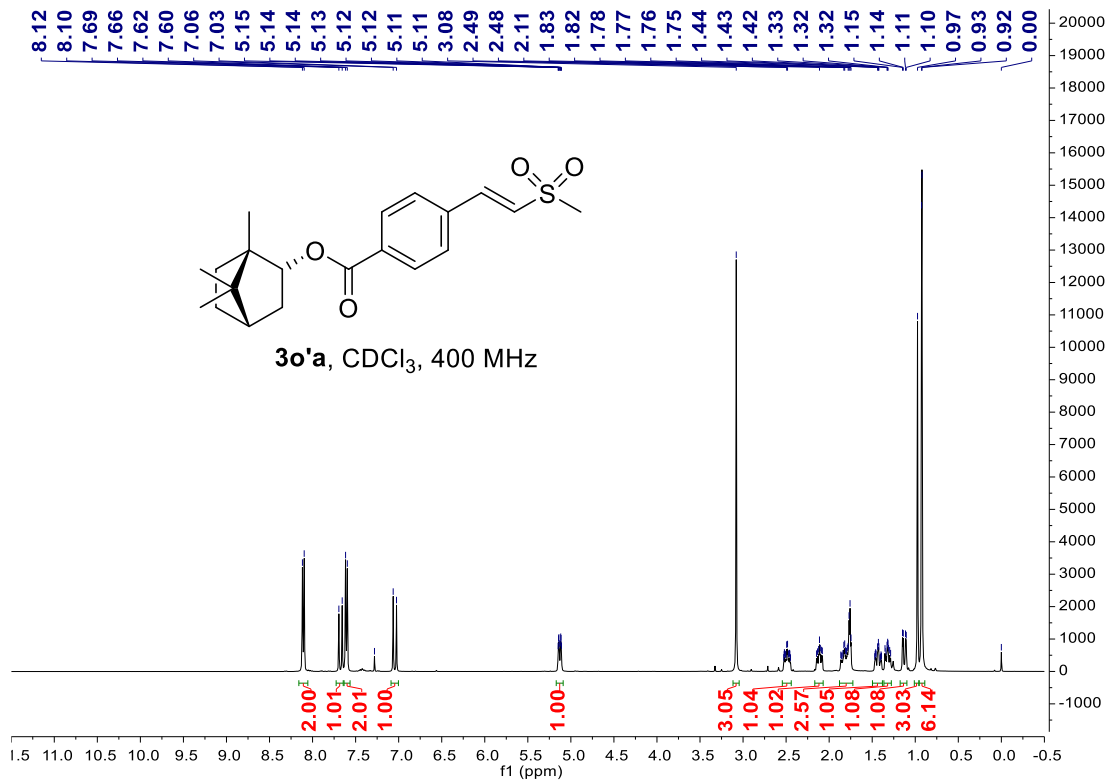

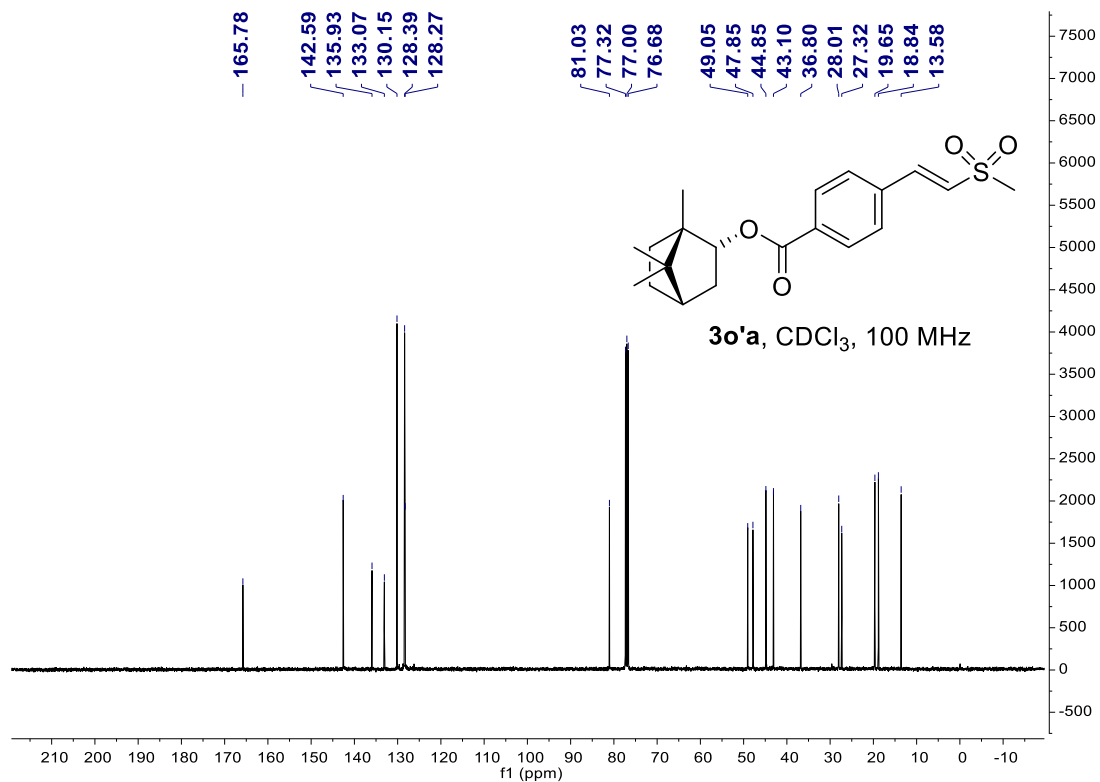

(1*R*,2*R*,4*S*)-1,3,3-trimethylbicyclo[2.2.1]heptan-2-yl 4-((*E*)-2-(methylsulfonyl)vinyl)benzoate (**3p'a**)

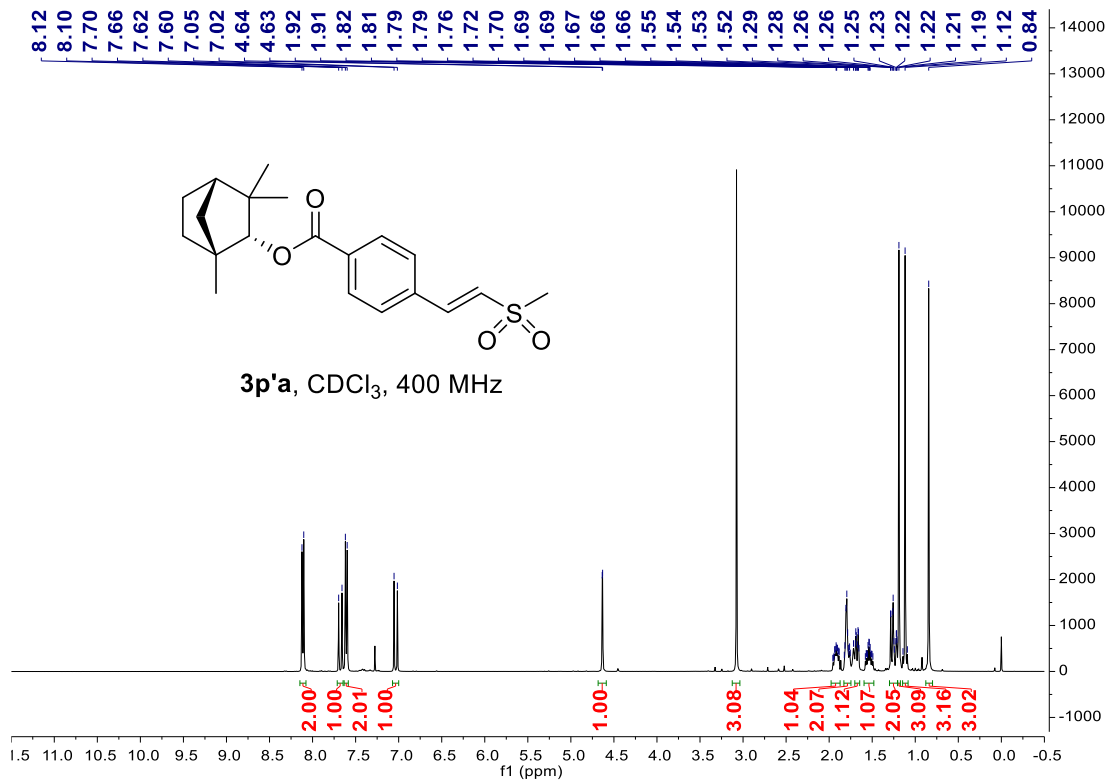



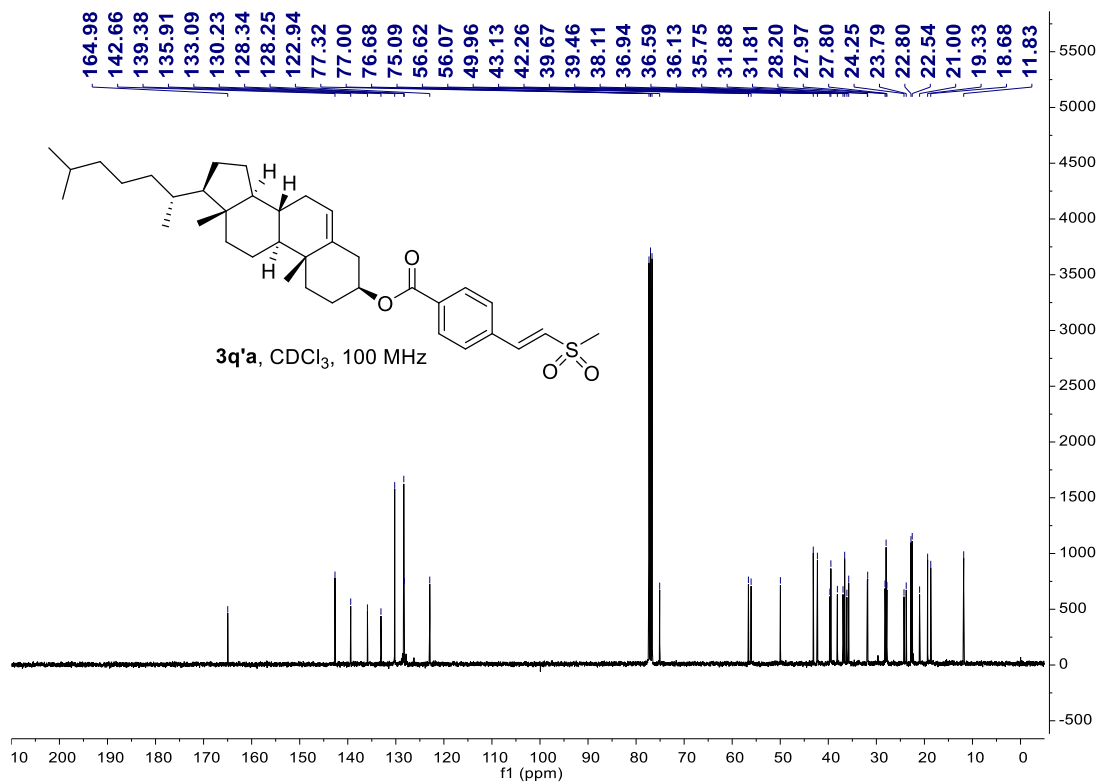

(3S,8S,9S,10R,13S,14S,17S)-17-acetyl-10,13-dimethyl-2,3,4,7,8,9,10,11,12,13,14,15,16,17-tetradecahydro-1H-cyclopenta[a]phenanthren-3-yl 4-((E)-2-(methylsulfonyl)vinyl)benzoate (**3r'a**)

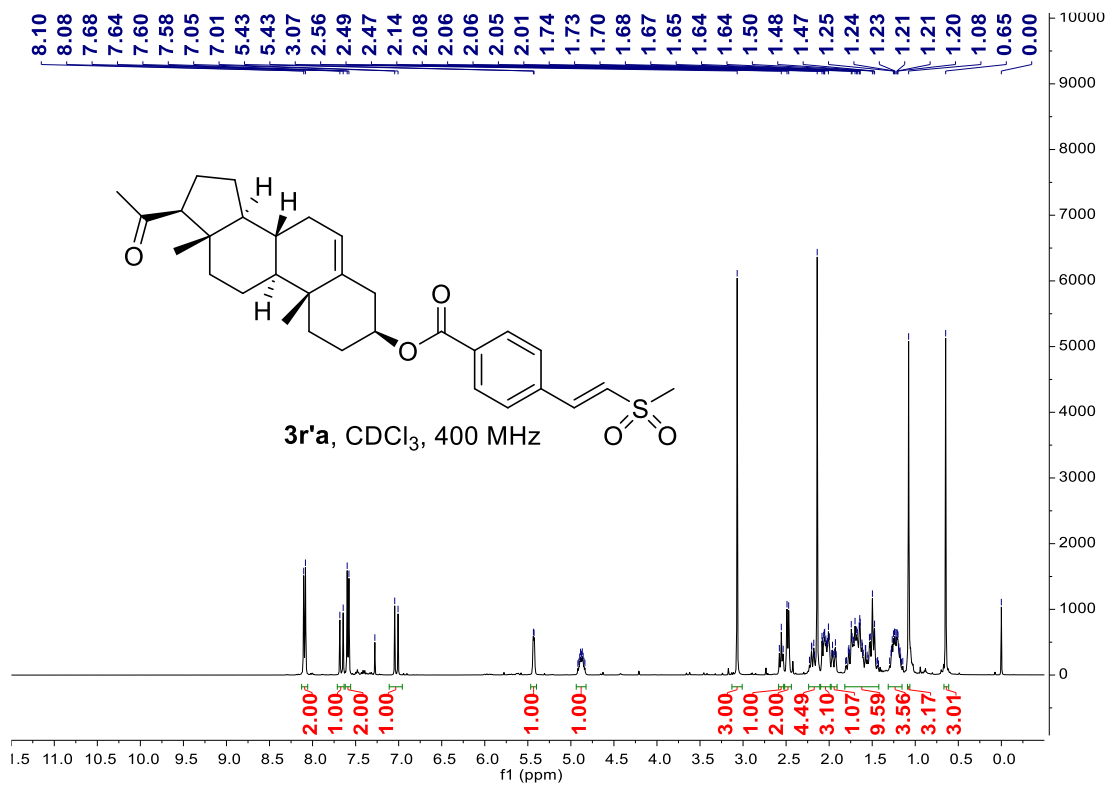



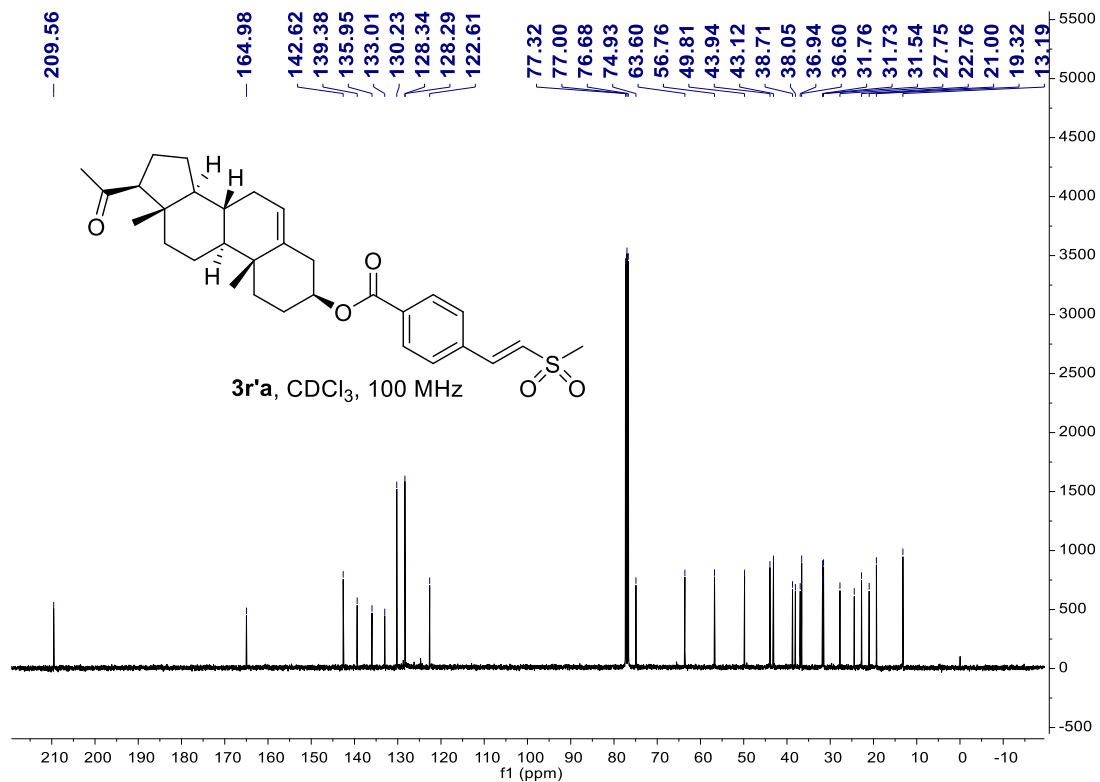

(4*S*,5'*R*,6*aR*,6*bS*,8*aS*,8*bR*,9*S*,10*R*,11*aS*,12*aS*,12*bS*)-5',6*a*,8*a*,9-tetramethyl-1,3,3',4,4',5,5',6,6*a*,6*b*,6',7,8,8*a*,8*b*,9,11*a*,12,12*a*,12*b*-icosahydrospiro[naphtho[2',1':4,5]indeno[2,1-*b*]furan-10,2'-pyran]-4-yl 4-((*E*)-2-(methylsulfonyl)vinyl)benzoate (**3s'a**)

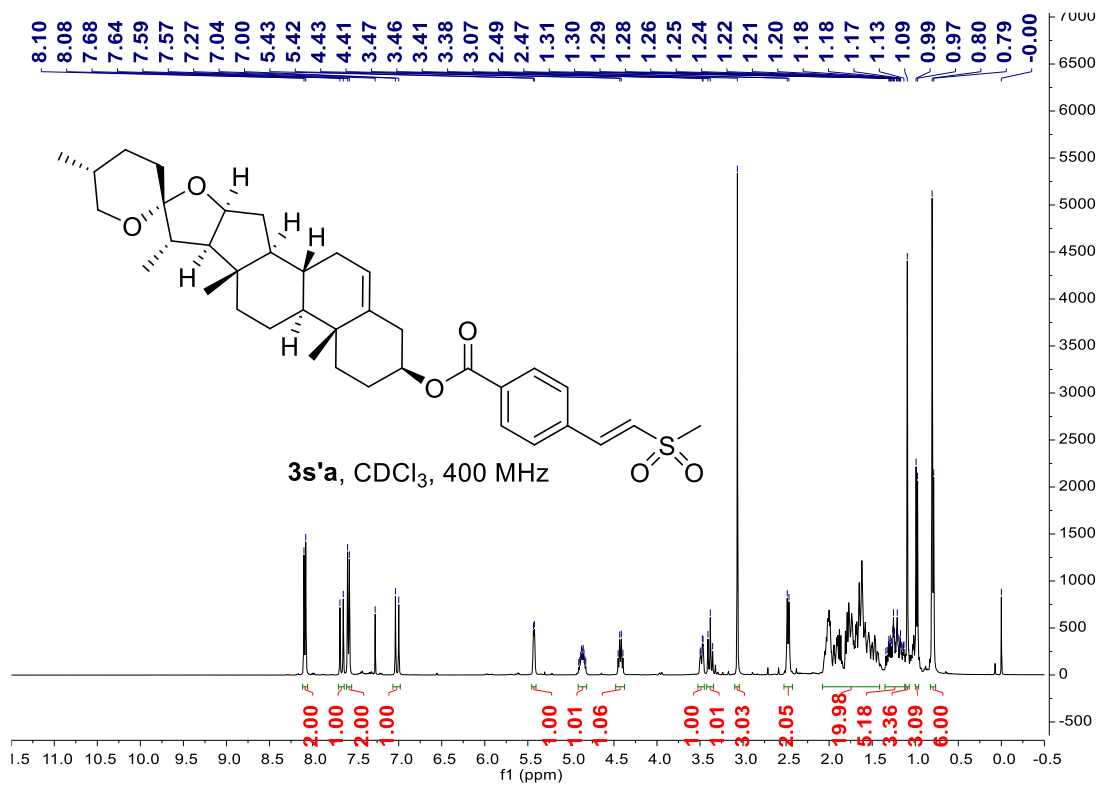

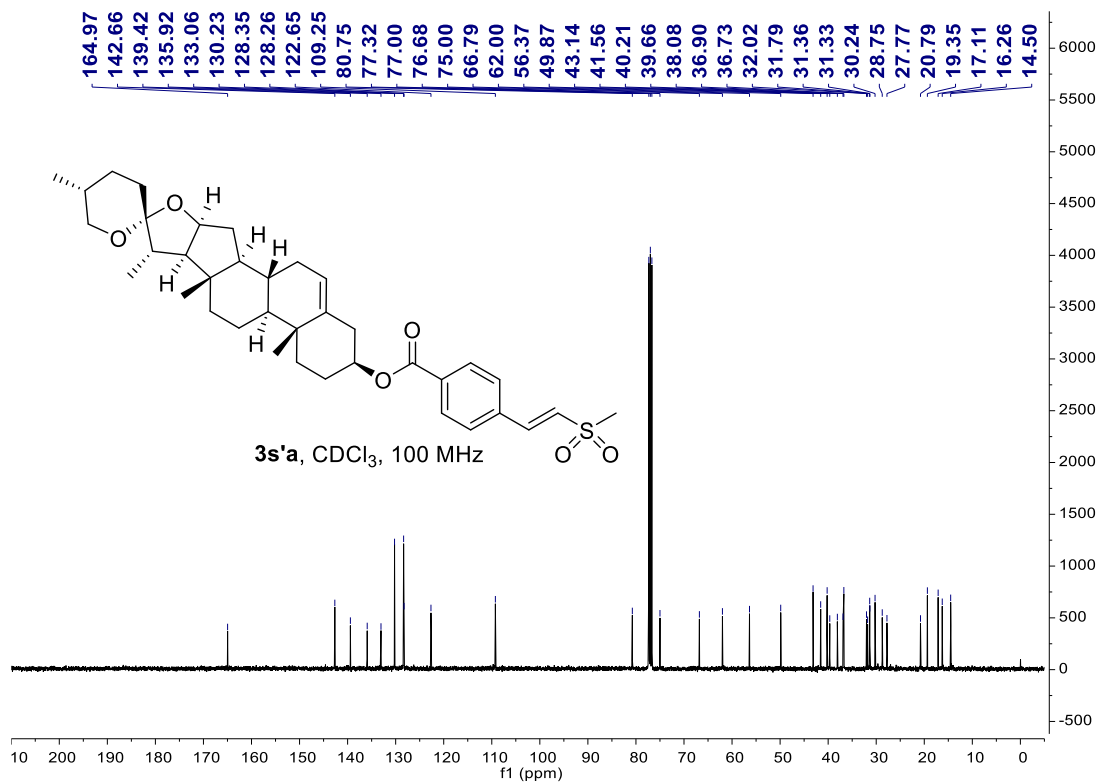

(8*R*,9*S*,10*R*,13*S*,14*S*,17*S*)-10,13-dimethyl-3-oxo-2,3,6,7,8,9,10,11,12,13,14,15,16,17-tetradecahydro-1*H*-cyclopenta[*a*]phenanthren-17-yl 4-((*E*)-2-(methylsulfonyl)vinyl)benzoate (**3t'a**)

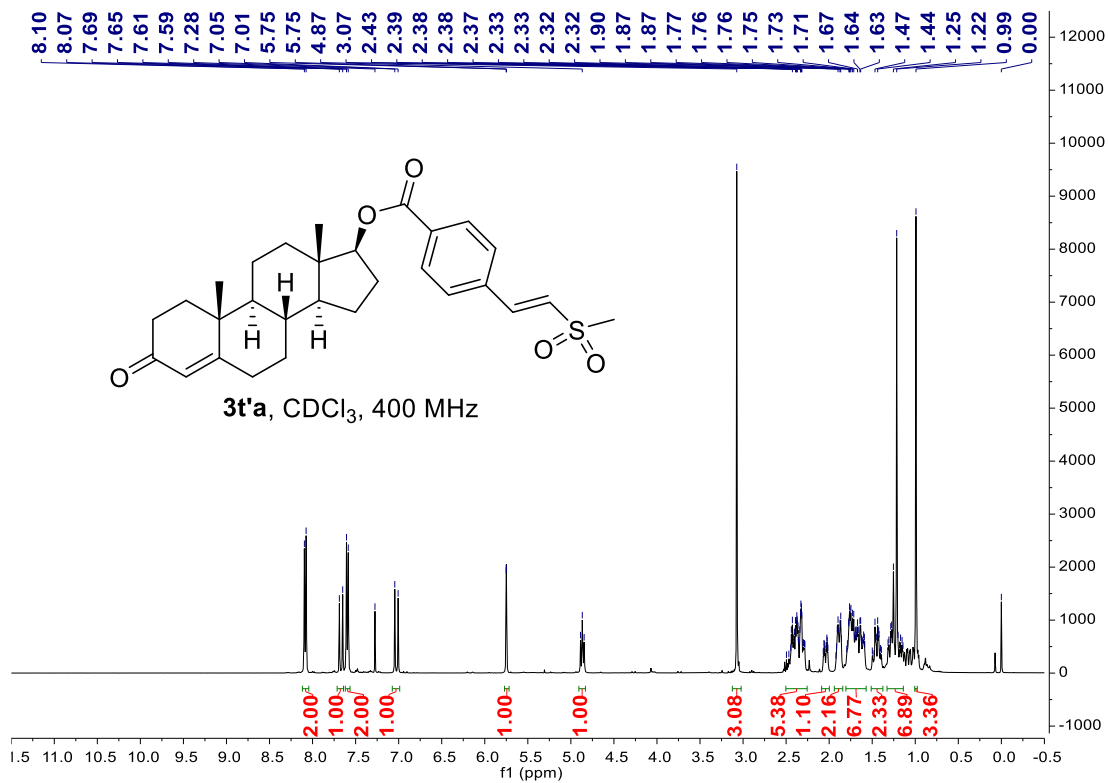

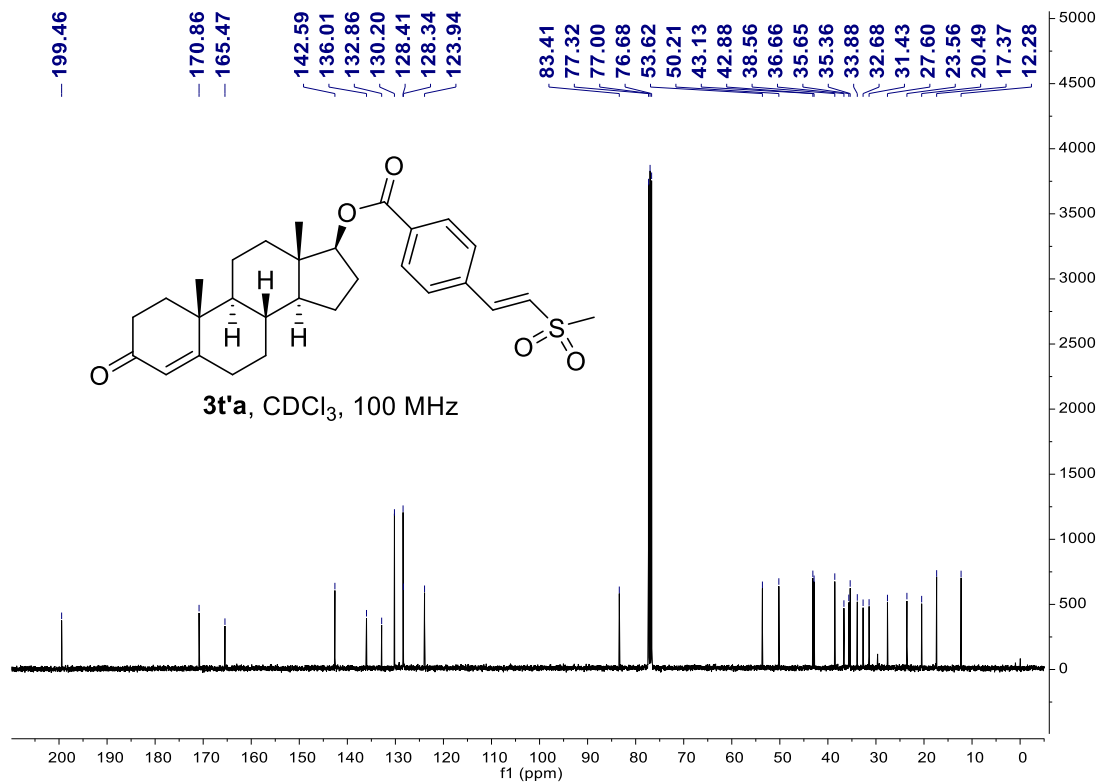

(*E*)-4-(2-(methylsulfonyl)vinyl)phenyl (S)-2-(6-methoxynaphthalen-2-yl)propanoate  
**(3u'a)**

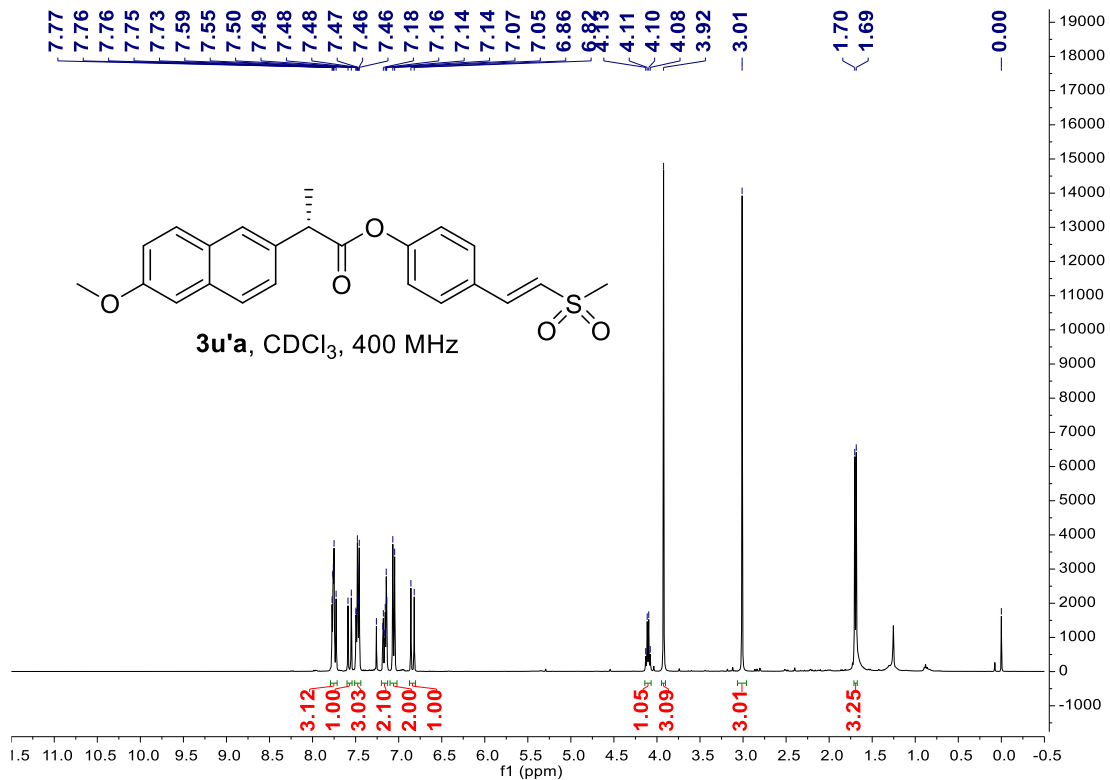

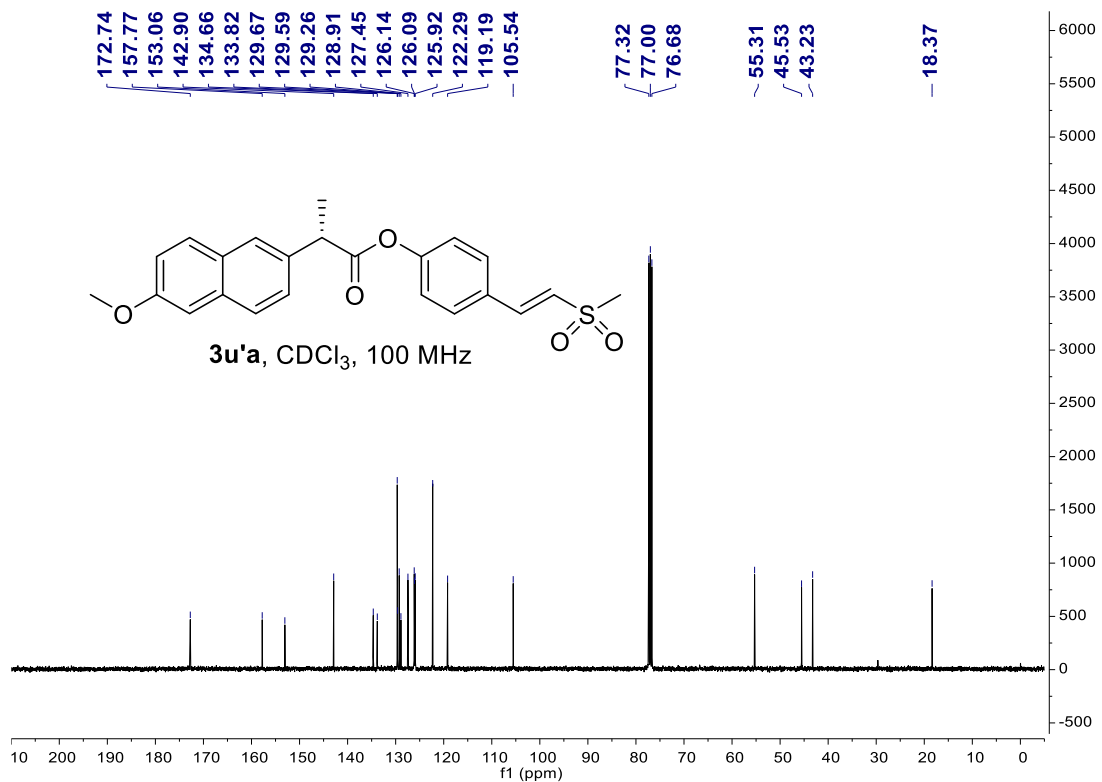

isopropyl (*E*)-2-methyl-2-(4-(4-(2-(methylsulfonyl)vinyl)benzoyl)phenoxy)propanoate  
(**3v'a**)

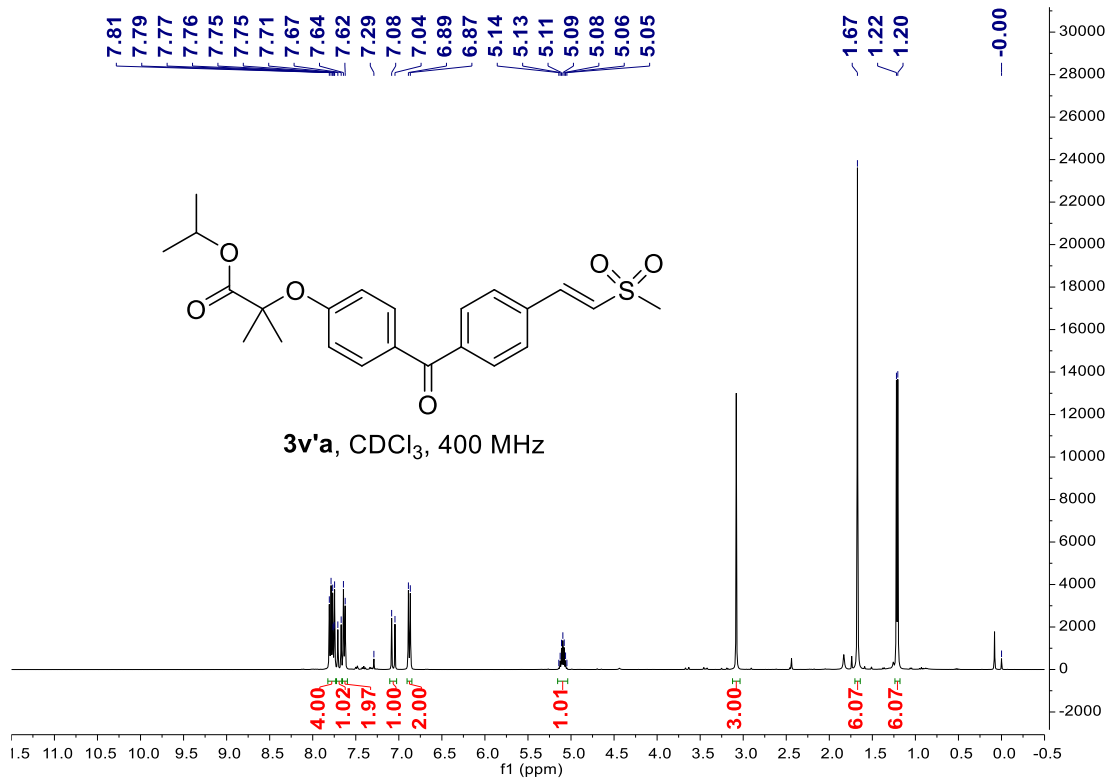

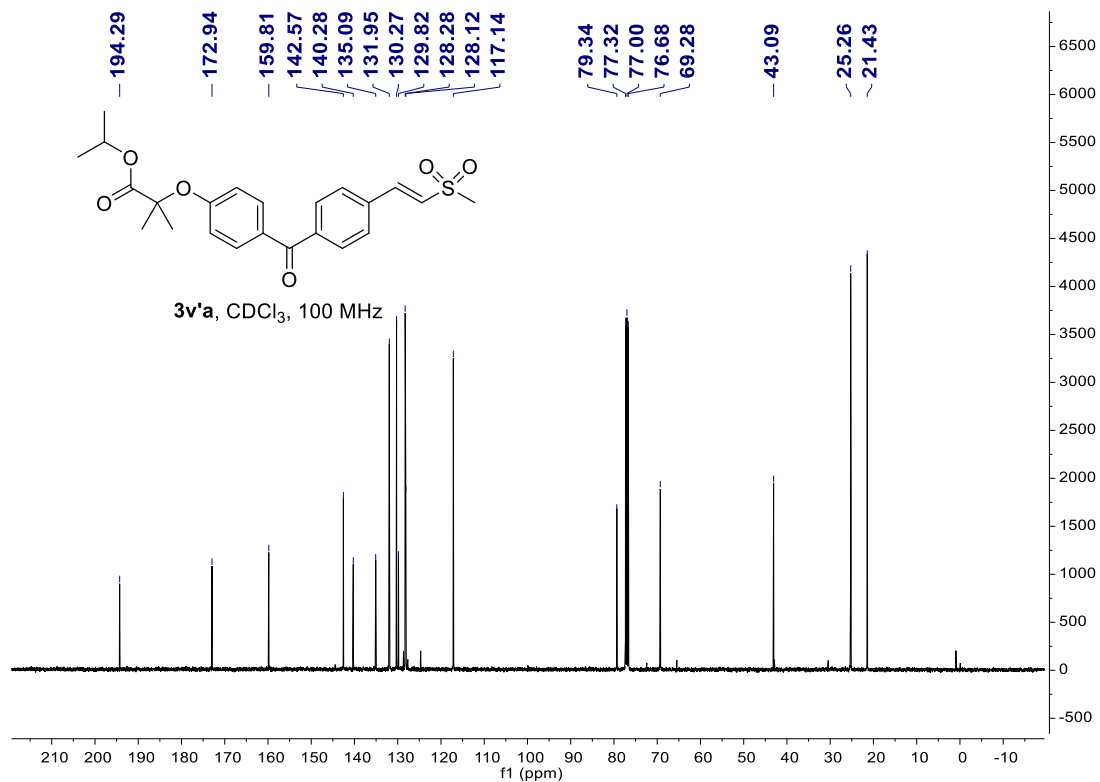

The NMR spectra of the reaction system of **1e'**, **2a** and DABCO·(SO<sub>2</sub>)<sub>2</sub>

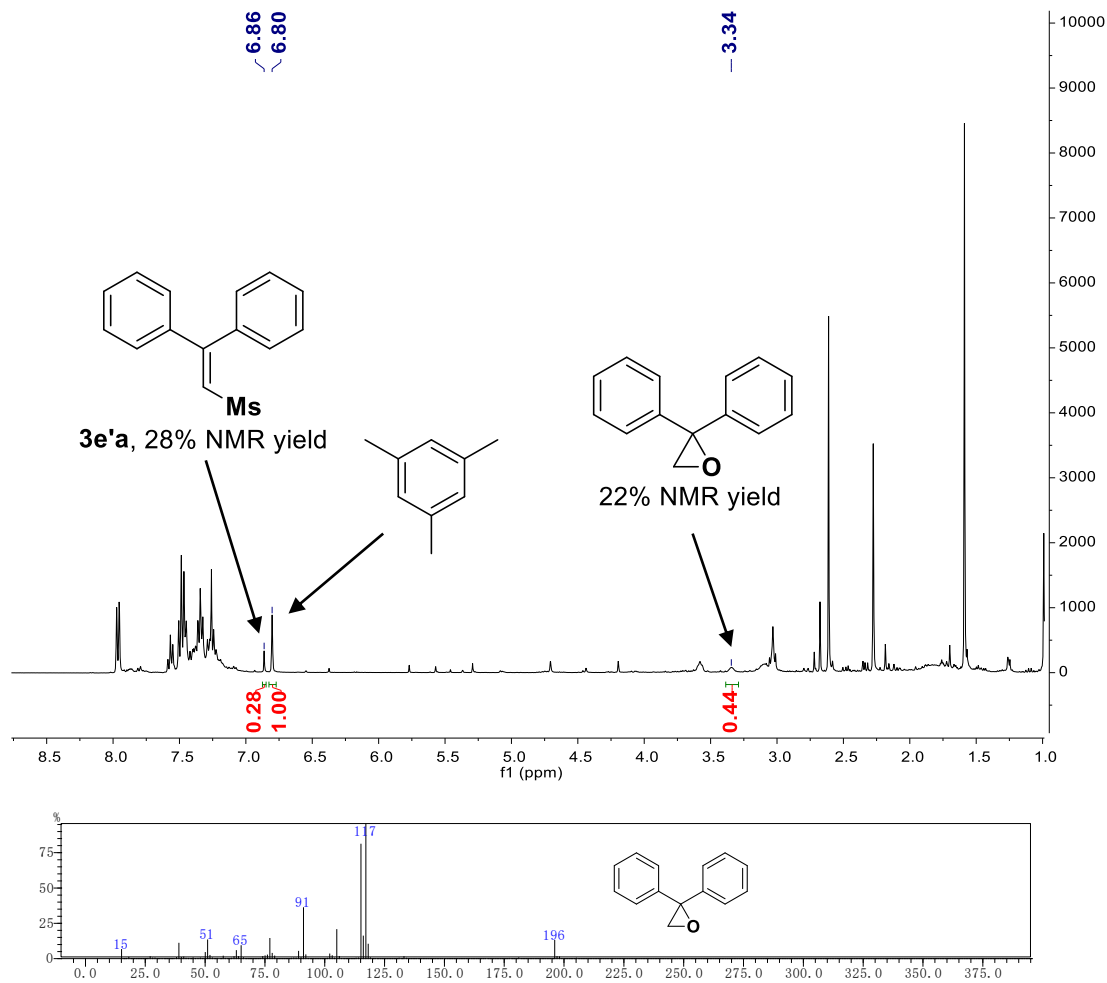

## The GC-MS spectra of the adducts 4, 5, 6 and 7

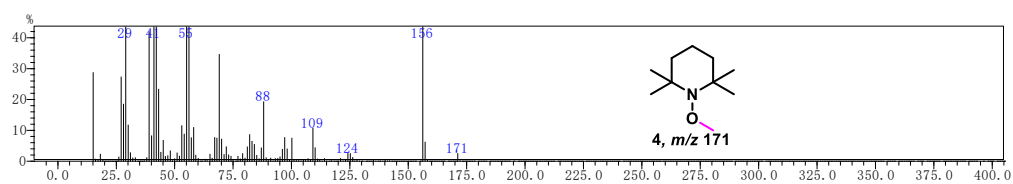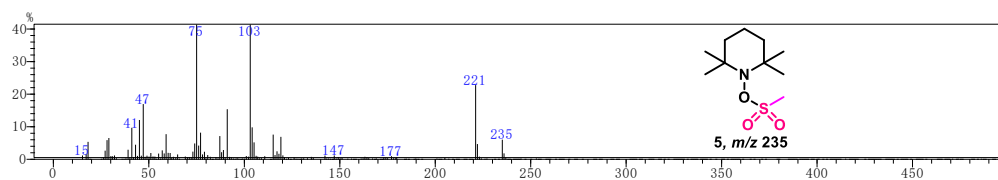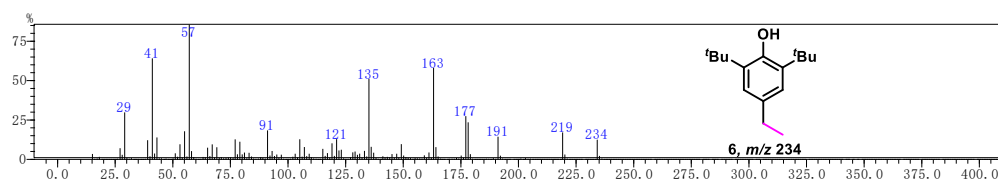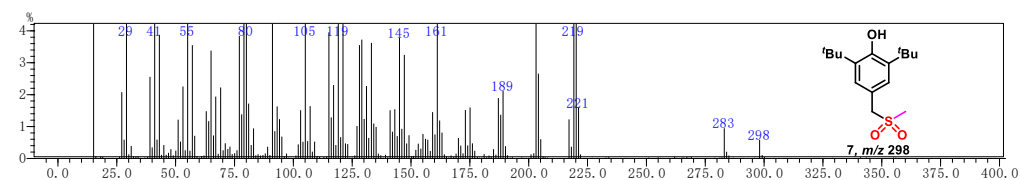

## The GC-MS spectra of PhCOMe

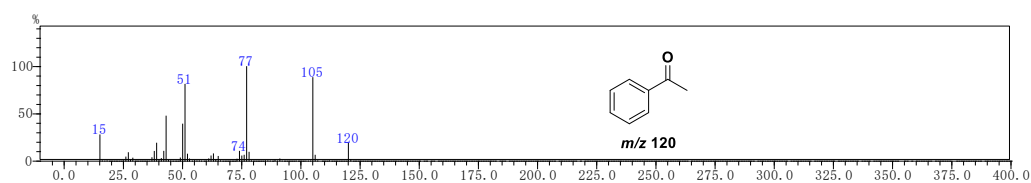

Supplement: d3qo01119d1.pdf [file d3qo01119d1.pdf]
